# Supplementary material for: Design, synthesis, and cell-based in vitro assay of deoxyinosine-mixed SATE-dCDN prodrugs that activate all common STING variants
Source: Royal Society of Chemistry journal article supplement (doi:10.1039/d3ob01838e), 2023-12-16

## Supplementary information

### Design, synthesis, and cell-based in vitro assay of deoxyinosine-mixed SATE-dCDN prodrugs that activate all common STING variants

Zhiqiang Xie <sup>a</sup>, Yuchen Yang <sup>a</sup>, Dejun Ma <sup>a</sup>, Zhen Xi <sup>\*, a, b, c, d</sup>

<sup>a</sup> State key Laboratory of Elemento-organic Chemistry, College of Chemistry, Nankai University, Tianjin 300071, China

<sup>b</sup> National Pesticide Engineering Research Centre (Tianjin 300071)

<sup>c</sup> Haihe Laboratory of Sustainable Chemical Transformations, Tianjin 300192 (China)

<sup>d</sup> Collaborative Innovation Centre of Chemical Science and Engineering (Tianjin), Tianjin 300071, China

\* Corresponding author.

*E-mail address:* [zhenxi@nankai.edu.cn](mailto:zhenxi@nankai.edu.cn). (Z. Xi)

#### Table of Contents

| Title                                                                                                 | Page    |
|-------------------------------------------------------------------------------------------------------|---------|
| 1. Serum stability                                                                                    | S2      |
| 2. Intracellular uptake and efflux of SATE-dCDN prodrugs                                              | S3      |
| 3. Activities of deoxyinosine-mixed dCDN prodrugs and CDNs                                            | S3      |
| 4. Cell viability                                                                                     | S4      |
| 5. Activity against five hSTING variants                                                              | S5      |
| 6. RT-qPCR primers of target genes and the internal control gene                                      | S5      |
| 7. Relative quantification of phospho-STING, phospho-TBK1, phospho-IRF3                               | S6      |
| 8. Chemical characterization of <sup>1</sup> H, <sup>13</sup> C, <sup>31</sup> P NMR and HPLC spectra | S7-S53  |
| 9. Raw Images of western blots                                                                        | S54-S60 |

## 1. Serum stability

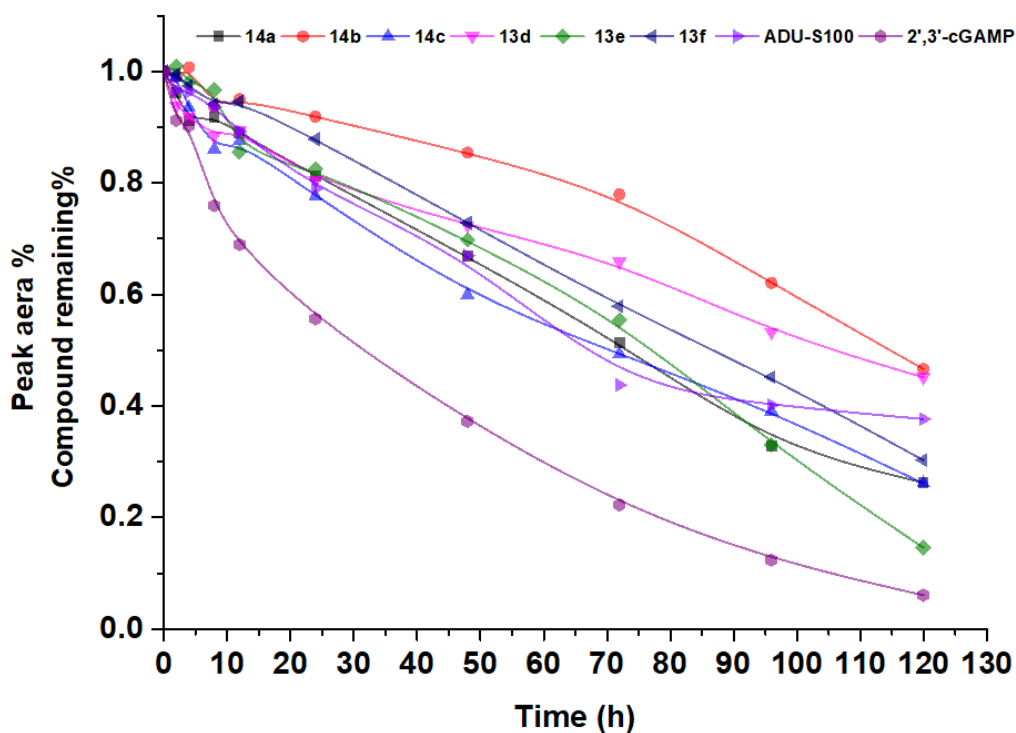

**Fig. S1** Deoxyinosine-mixed SATE-dCDN prodrugs retained the high serum stability. The serum stability analysis of prodrugs was determined in 20% FBS. Each compound (100  $\mu$ M) was incubated in 20 % FBS at 37°C. At various time (0 h, 2 h, 4 h, 8 h, 12 h, 24 h, 48 h, 72 h, 96 h, 120 h), aliquots of the reaction mixture were analyzed with HPLC at 254 nm. The % remaining of test compounds after incubation in serum was calculated.

**Table S1.** The half-life period of deoxyinosine-mixed dCDN prodrugs and CDNs

| Compounds   | $T_{1/2}$ (h) |
|-------------|---------------|
| <b>13d</b>  | 105           |
| <b>13e</b>  | 77            |
| <b>13f</b>  | 86            |
| <b>14a</b>  | 73            |
| <b>14b</b>  | 114           |
| <b>14c</b>  | 70            |
| <b>15</b>   | 72            |
| 2',3'-cGAMP | 31            |
| ADU-S100    | 67            |

## 2. Intracellular uptake and efflux of SATE-dCDN prodrugs

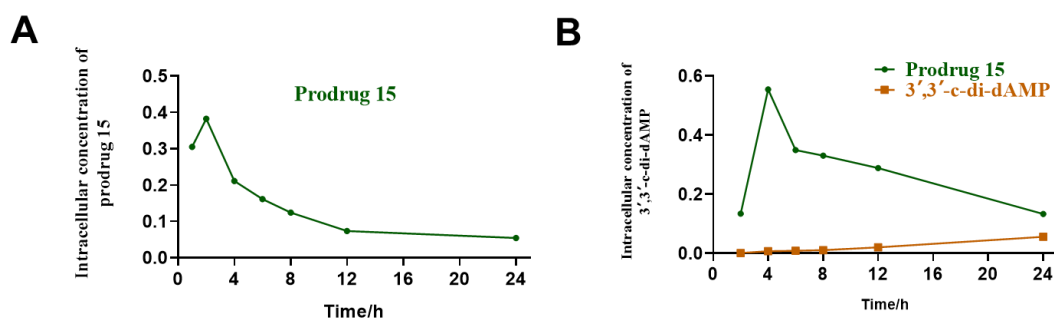

**Fig. S2.** Uptake and efflux of SATE-dCDN prodrugs. (A) (B) THP-1 cells were treated with 10  $\mu$ M prodrug **15** or 100  $\mu$ M parent dCDN 3',3'-c-di-dAMP for the indicated period of time, and intracellular levels of the metabolites were determined in cellular extracts.

## 3. Activities of deoxyinosine-mixed dCDN prodrugs and CDNs

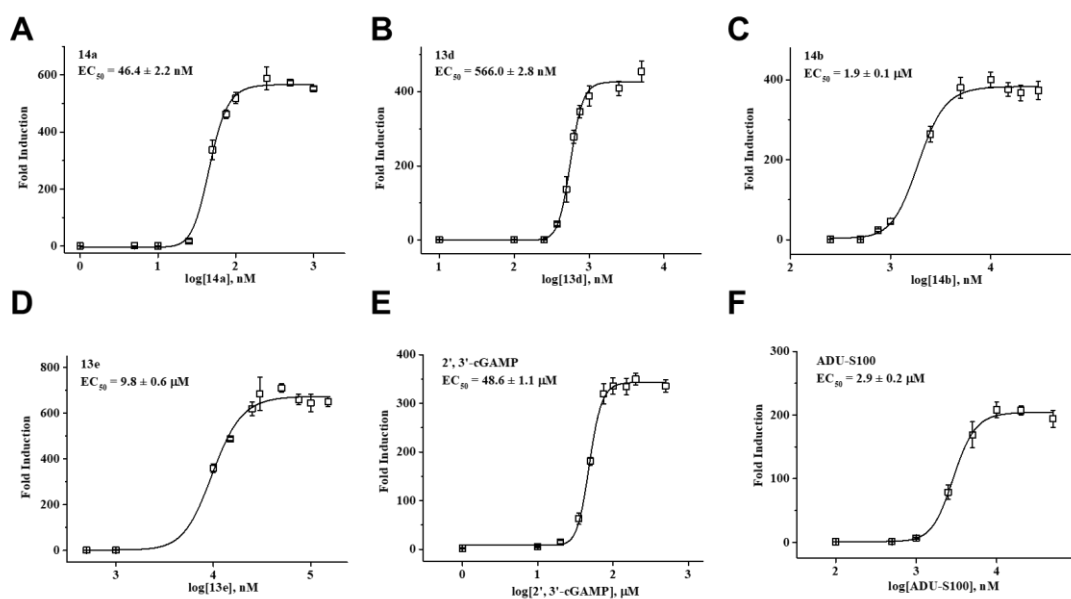

**Fig. S3.** Activities of deoxyinosine-mixed dCDN prodrugs and CDNs. The EC<sub>50</sub> values of **14a** (A), **13d** (B), **14b** (C), **13e** (D), 2',3'-cGAMP (E) and ADU-S100 (F) were also assessed in THP1-Lucia cells.

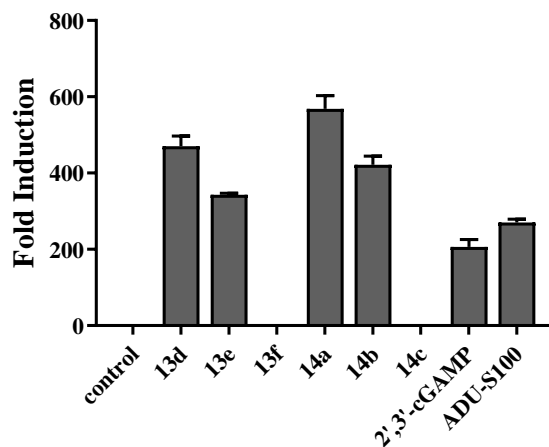

**Fig. S4.** The comparison of  $E_{max}$ . The  $E_{max}$  values of **13d-13e**, **14a-14c**, 2',3'-cGAMP and ADU-S100 were also assessed in THP1-Lucia cells.

#### 4. Cell viability

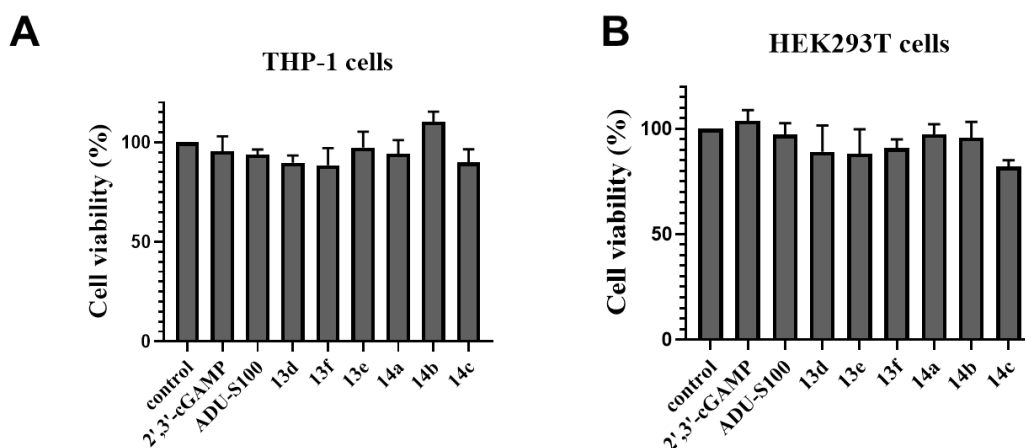

**Fig. S5.** Cell viability of THP-1 and HEK293T cells stimulated by inosine-mixed dCDN prodrugs and CDNs. (A)  $5 \times 10^3$  HEK293T cells or (B) THP-1 cells were seeded in 96-well plates. Cells were stimulated with inosine-mixed dCDN prodrugs (10  $\mu$ M), 2',3'-cGAMP (100  $\mu$ M) and ADU-S100 (10  $\mu$ M) for 24 h. Then Cell Counting Kit-8 (CCK8) (US EVERBRIGHT, c6005) was used to quantitatively assess cell viability through the OD value at 450 nm. Data were presented as mean  $\pm$  SD, n = 3.

## 5. Activity against five hSTING variants

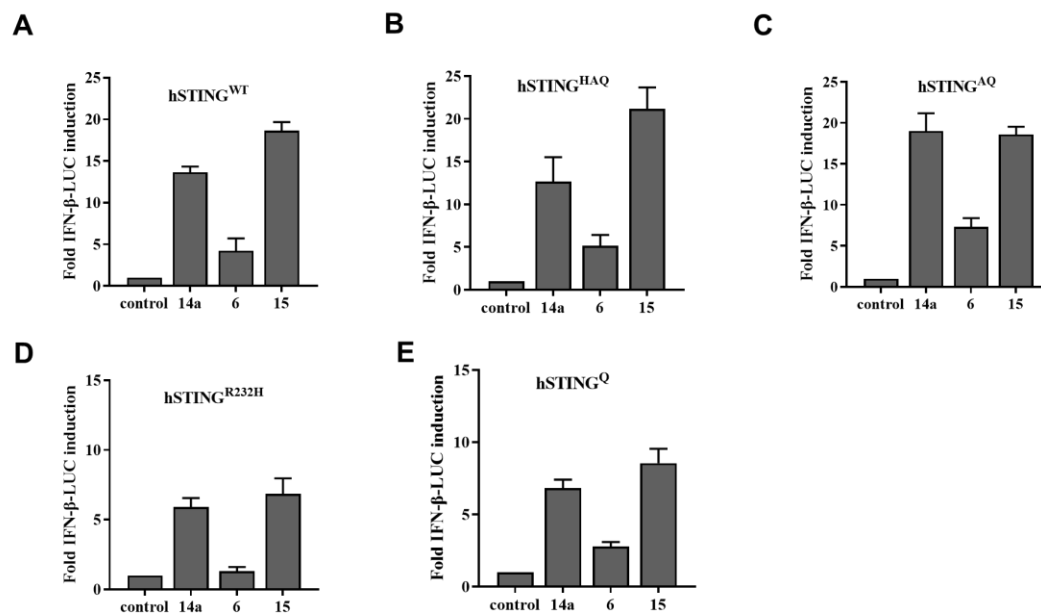

**Fig. S6.** The luciferase-based bioactivity evaluation of **14a**, 3',3'-c-di-IdAMP (**6**), SATE-3',3'-c-di-dAMP (**15**) against five hSTING variants. HEK293T cells were cotransfected with IFN-β-luciferase reporter plasmids and the test plasmids expressing (A) hSTING-WT, (B) hSTING-HAQ, (C) hSTING-AQ, (D) hSTING-R232H, and (E) hSTING-R293Q. After 24 h, cells were further stimulated for 24 h in the presence of tested compound (50 μM). The cells were lysed for luciferase assay. Data were presented as mean ± SD, n=3.

## 6. RT-qPCR primers of target genes and the internal control gene

**Table S2.** RT-qPCR primers of target genes and the internal control gene

| Primer name | Sequence (5'-3')       |
|-------------|------------------------|
| IFN-β-F     | AACAAGTGTCTCCTCCAAT    |
| IFN-β-R     | TCTCCTCAGGGATGTCAAAG   |
| CXCL10-F    | CATTCTGATTTGCTGCCTTAT  |
| CXCL10-R    | TTGATGGCCTTCGATTCTGG   |
| IL-6-F      | AGACAGCCACTCACCTCTTCAG |
| IL-6-R      | TTCTGCCAGTGCCTCTTTGCTG |
| TNF-α-F     | TGAAAGCATGATCCGGGACG   |
| TNF-α-R     | AGGCAGAAGAGCGTGGTGCC   |

GADPH -F

GGACCTGACCTGCCGTCTA

GADPH-R

GAGTGGGTGTCGCTGTTGA

---

### 7. Relative quantification of phospho-STING, phospho-TBK1, phospho-IRF3

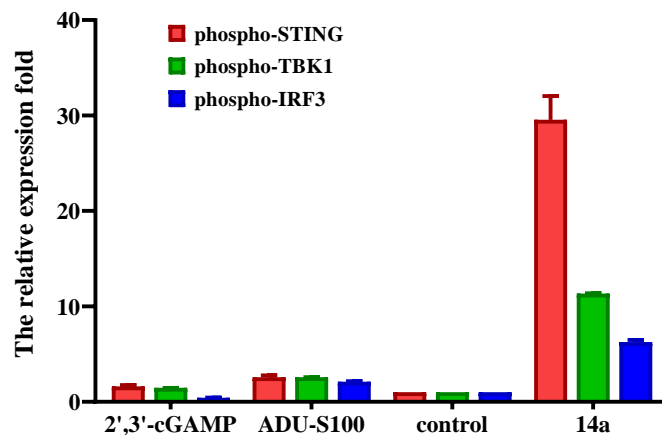

**Fig. S7.** Relative quantification of phospho-STING, phospho-TBK1, phospho-IRF3. Prodrug **14a** (10  $\mu$ M), 2',3'-cGAMP (100  $\mu$ M) and ADU-S100 (10  $\mu$ M) were used to treat THP1 cells for 4 h, and the levels of total STING, phospho-STING, total TBK1, phospho-TBK1, total IRF3, phospho-IRF3, and  $\beta$ -actin were assessed by Western blotting.

## 8. Chemical characterization of $^1\text{H}$ , $^{13}\text{C}$ , $^{31}\text{P}$ NMR and HPLC spectra

$^1\text{H}$ ,  $^{13}\text{C}$  spectra of **8**:

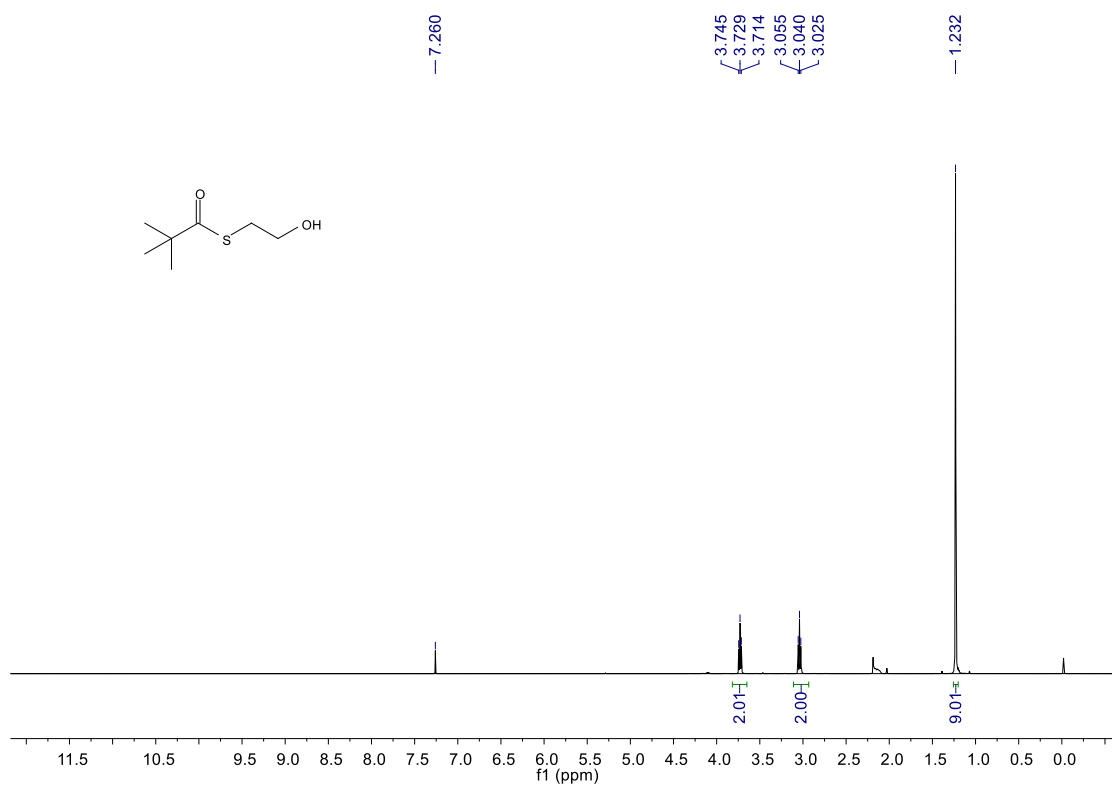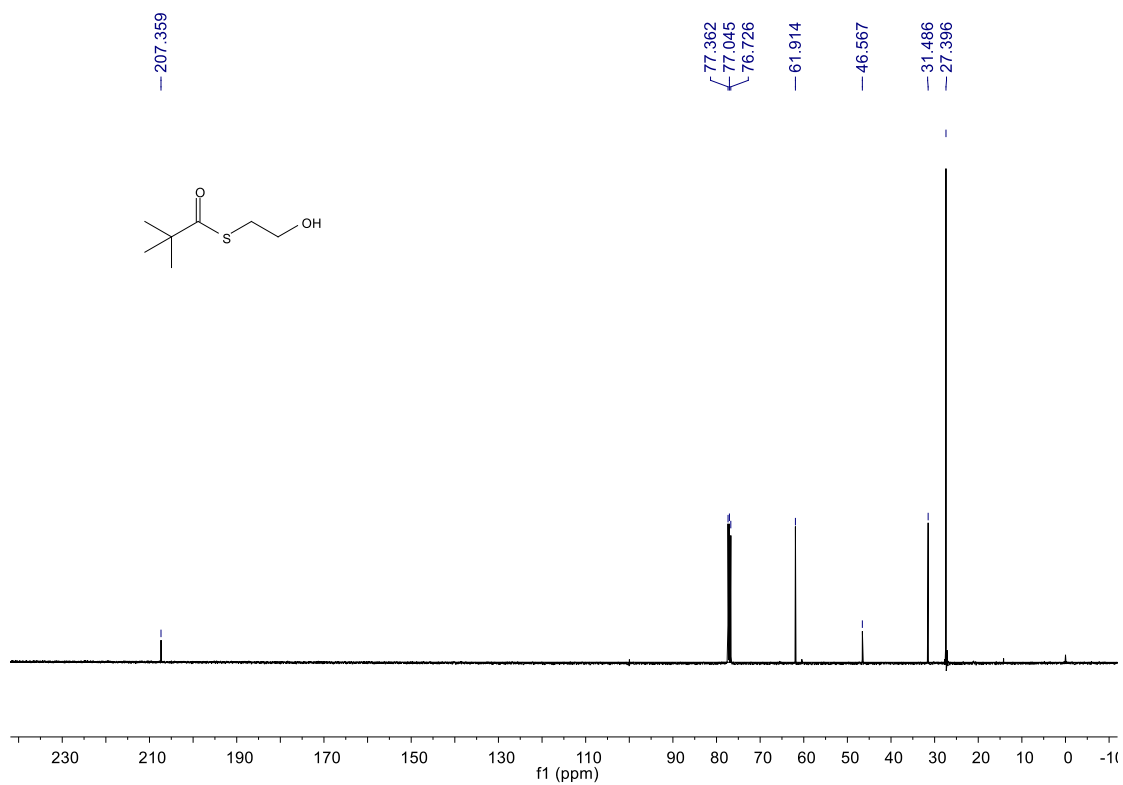

$^1\text{H}$ ,  $^{13}\text{C}$ ,  $^{31}\text{P}$  NMR spectra of **9a**:

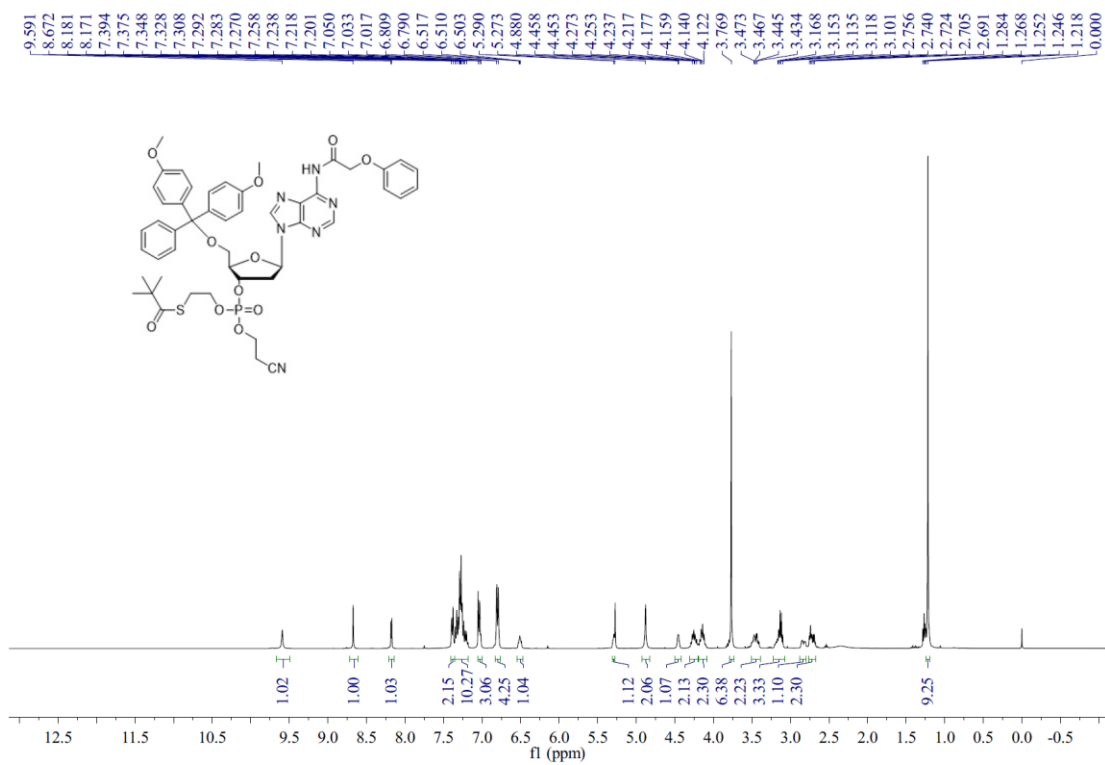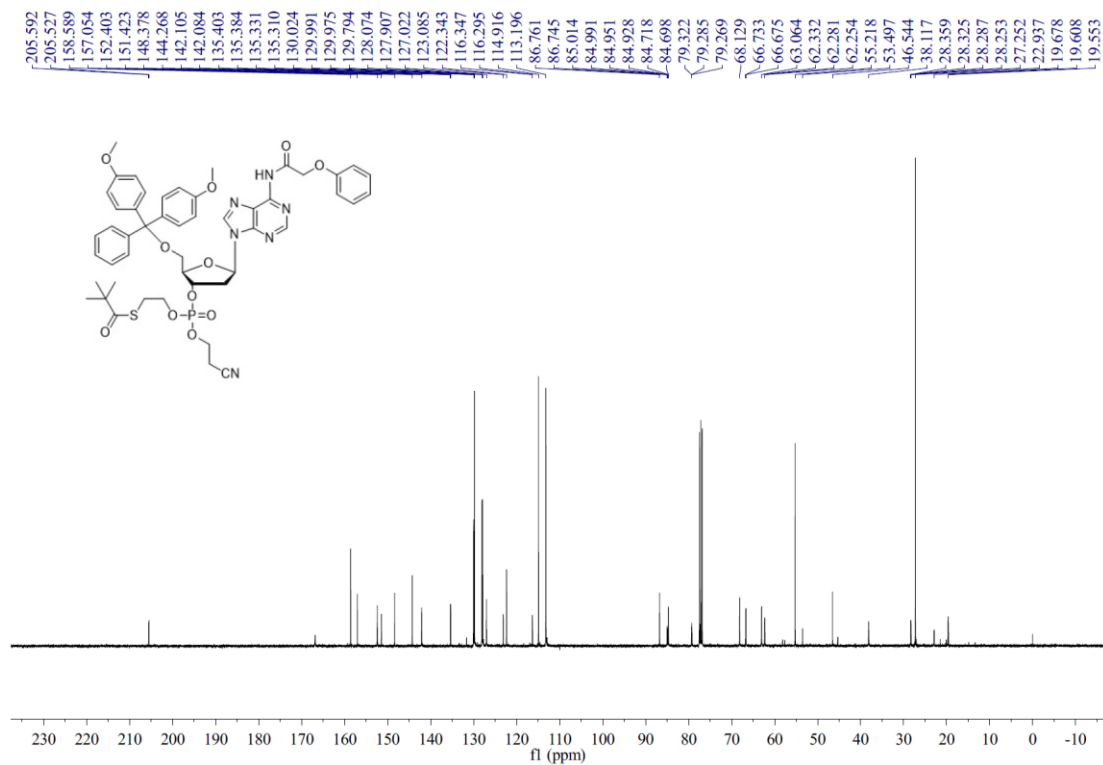



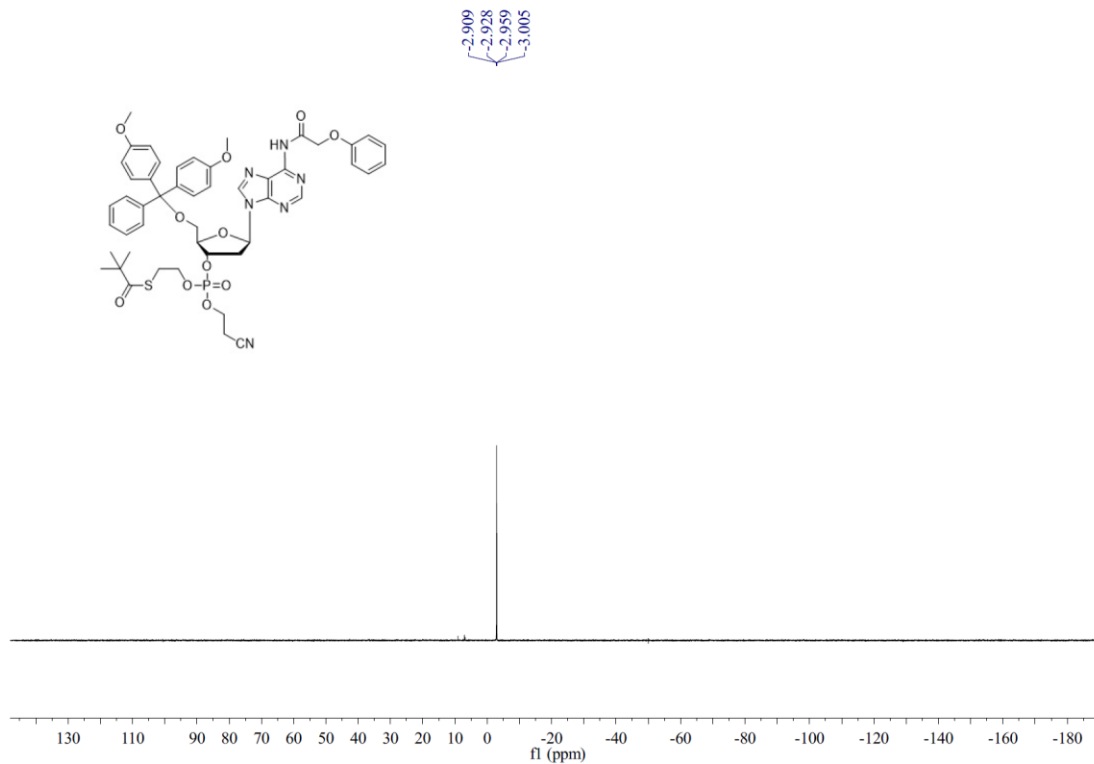

$^1\text{H}$ ,  $^{13}\text{C}$ ,  $^{31}\text{P}$  NMR of **9b**:

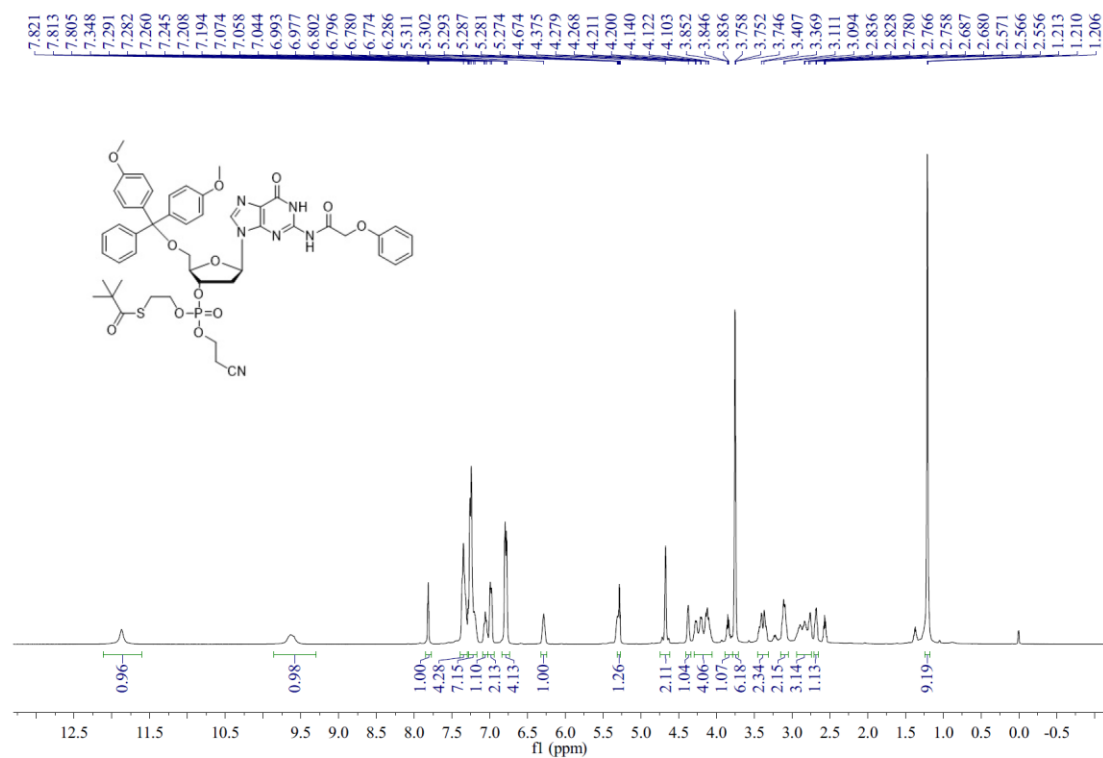

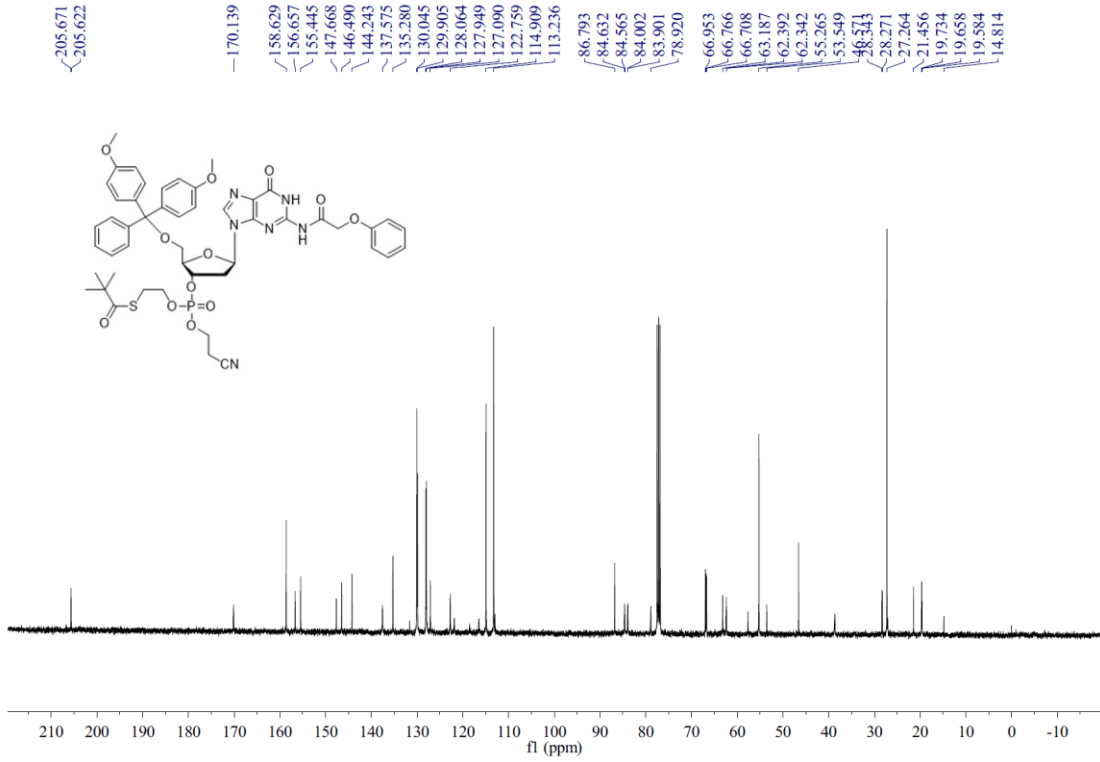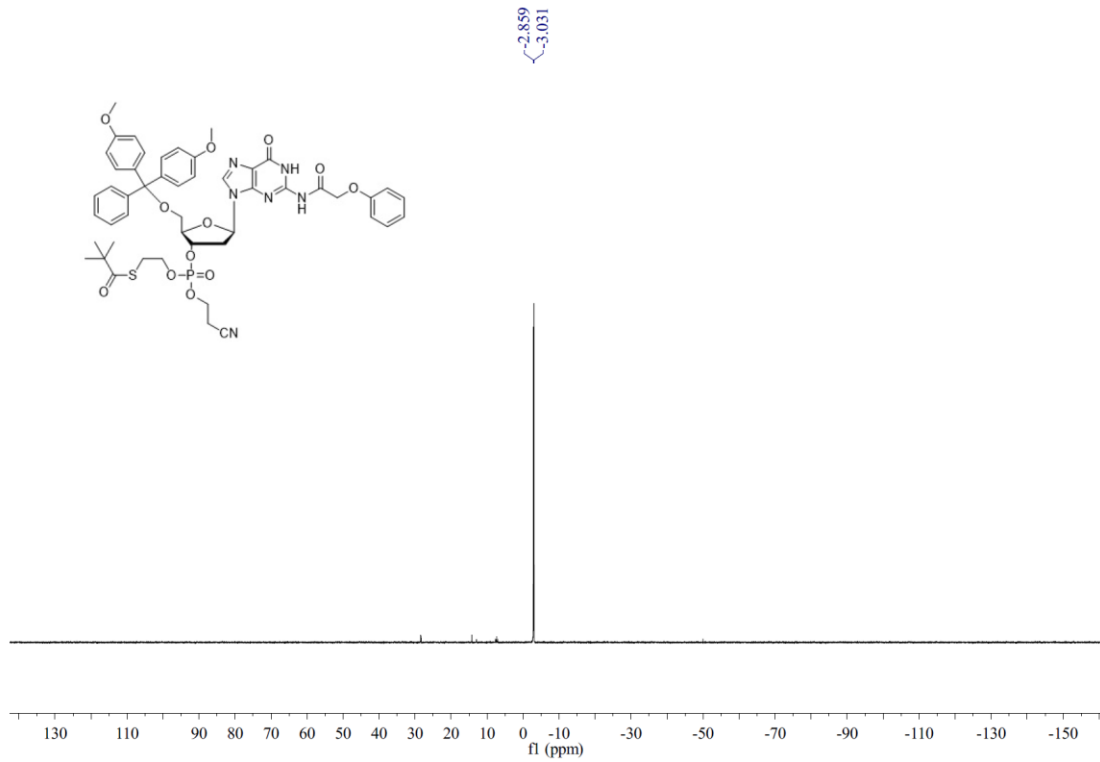

$^1\text{H}$ ,  $^{13}\text{C}$ ,  $^{31}\text{P}$  NMR of **9c**:

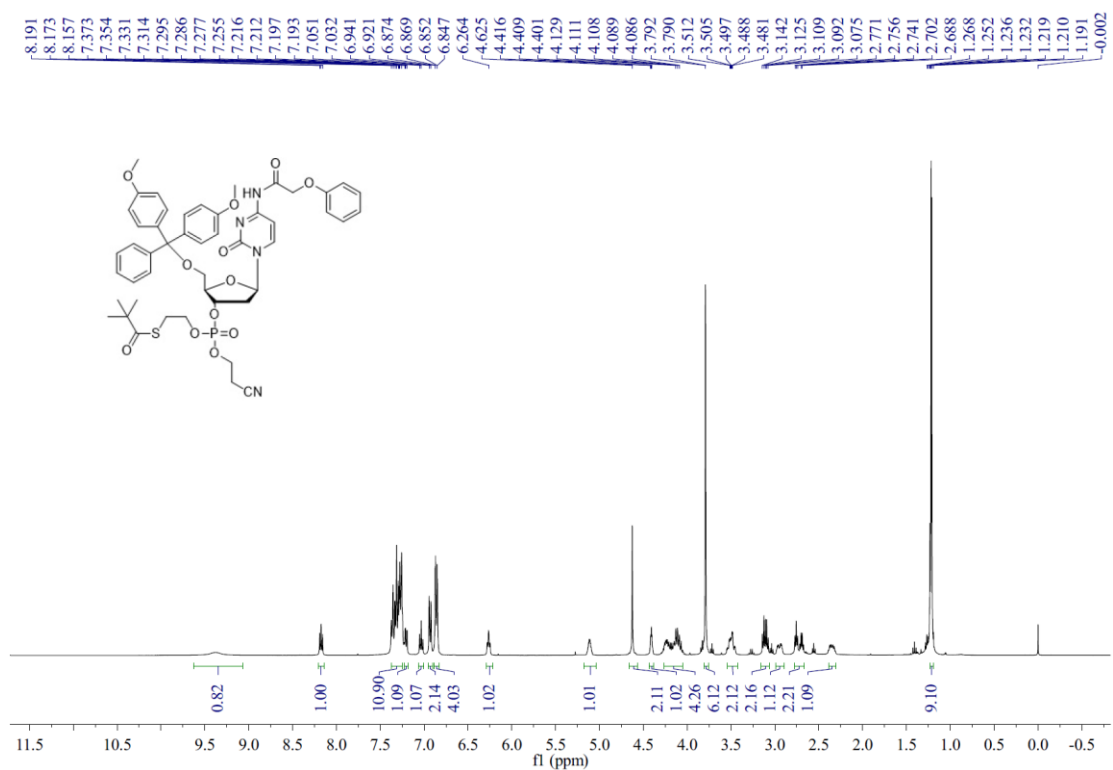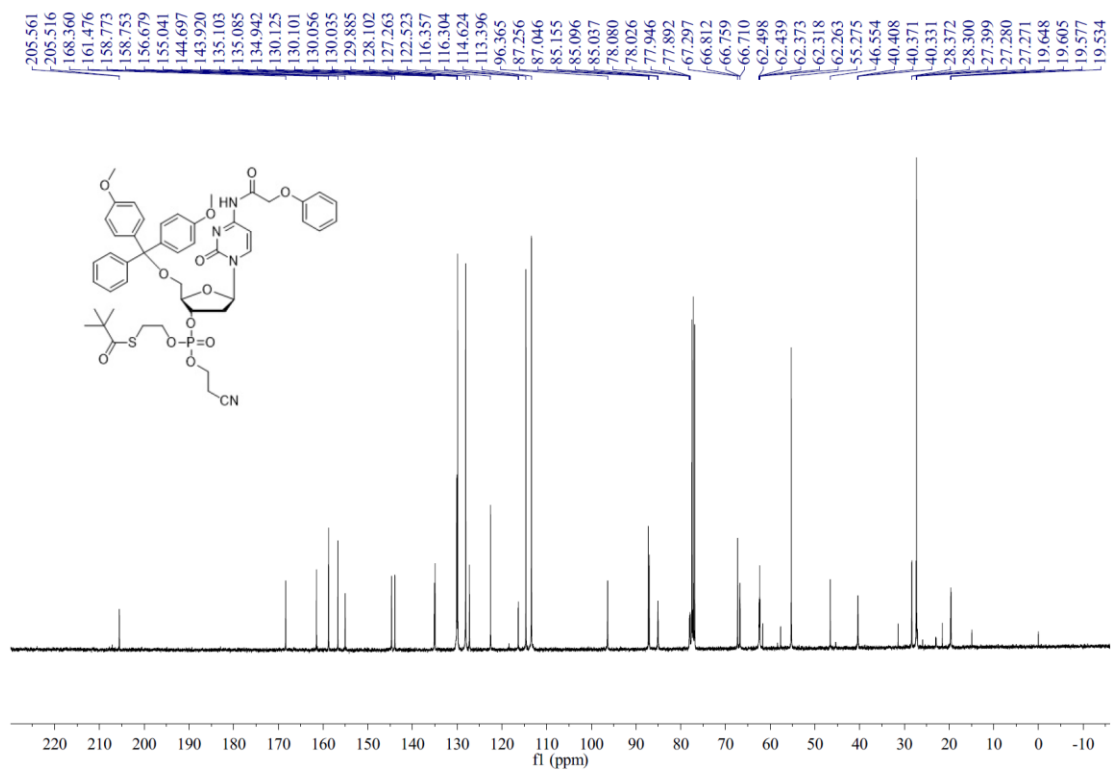

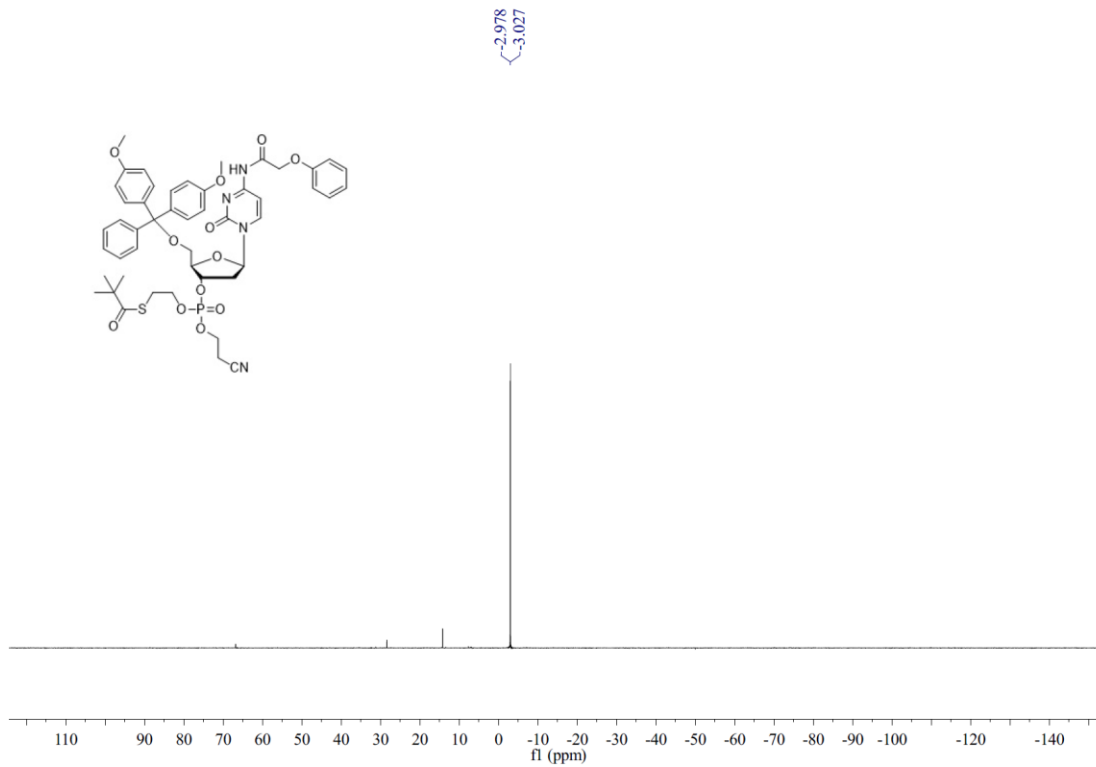

$^1\text{H}$ ,  $^{13}\text{C}$ ,  $^{31}\text{P}$  NMR of **9d**:

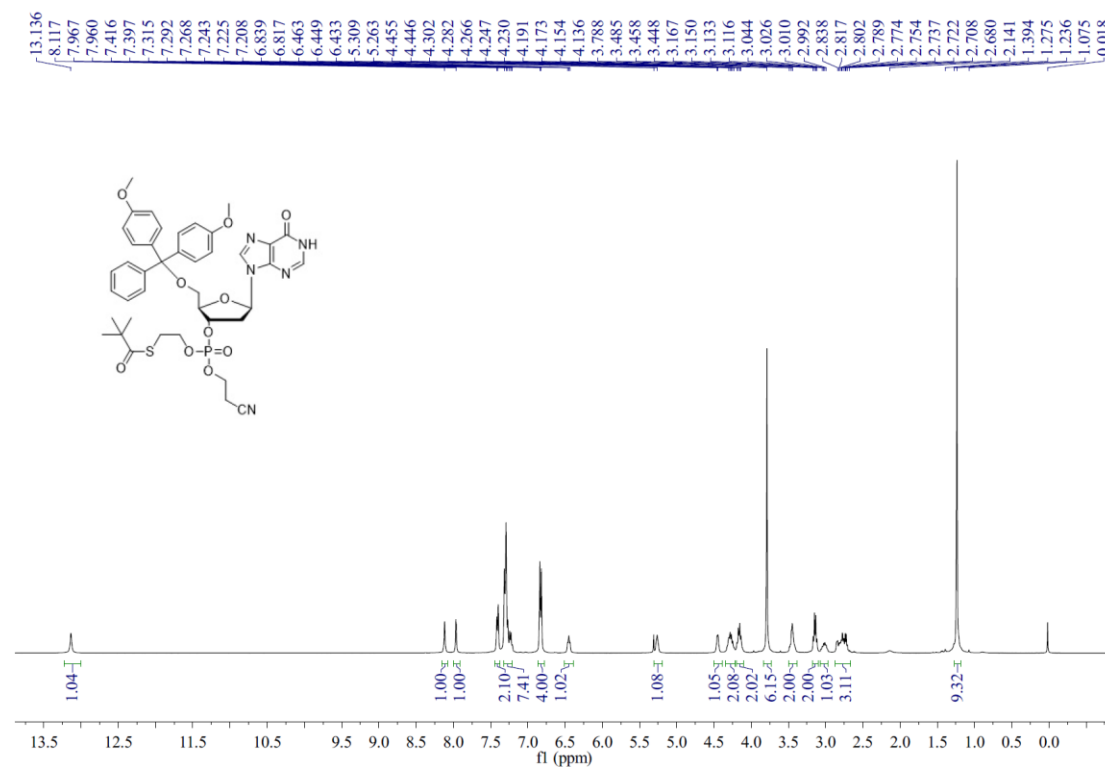

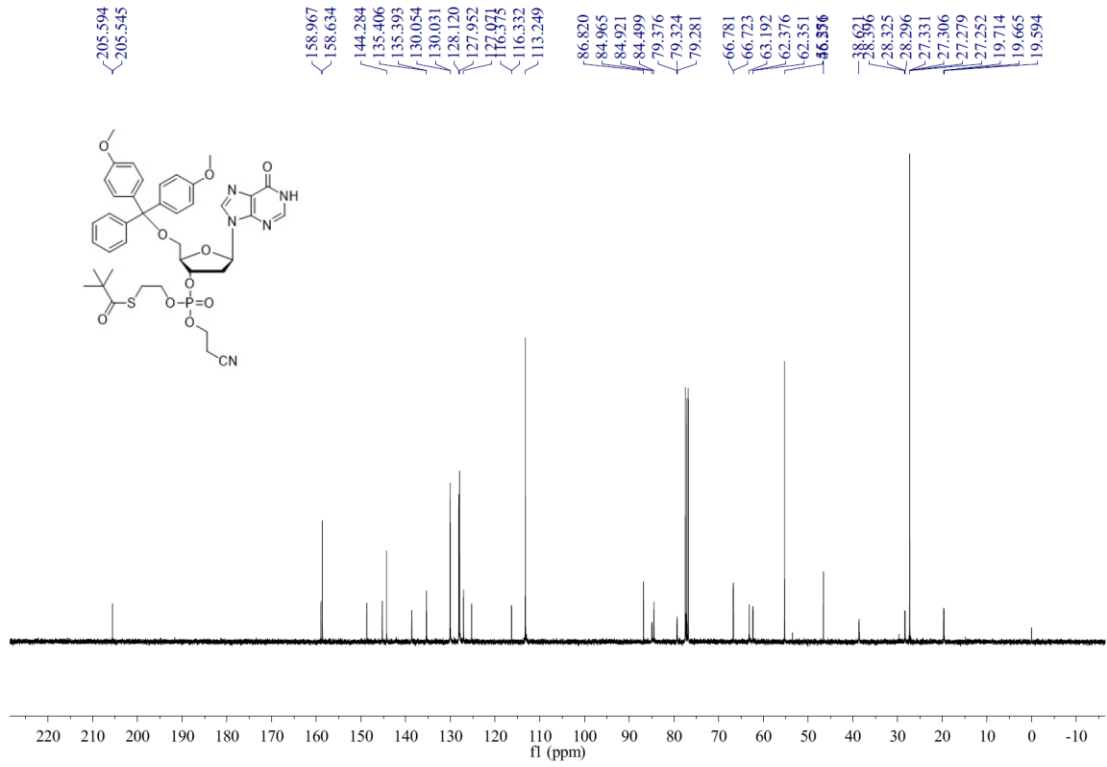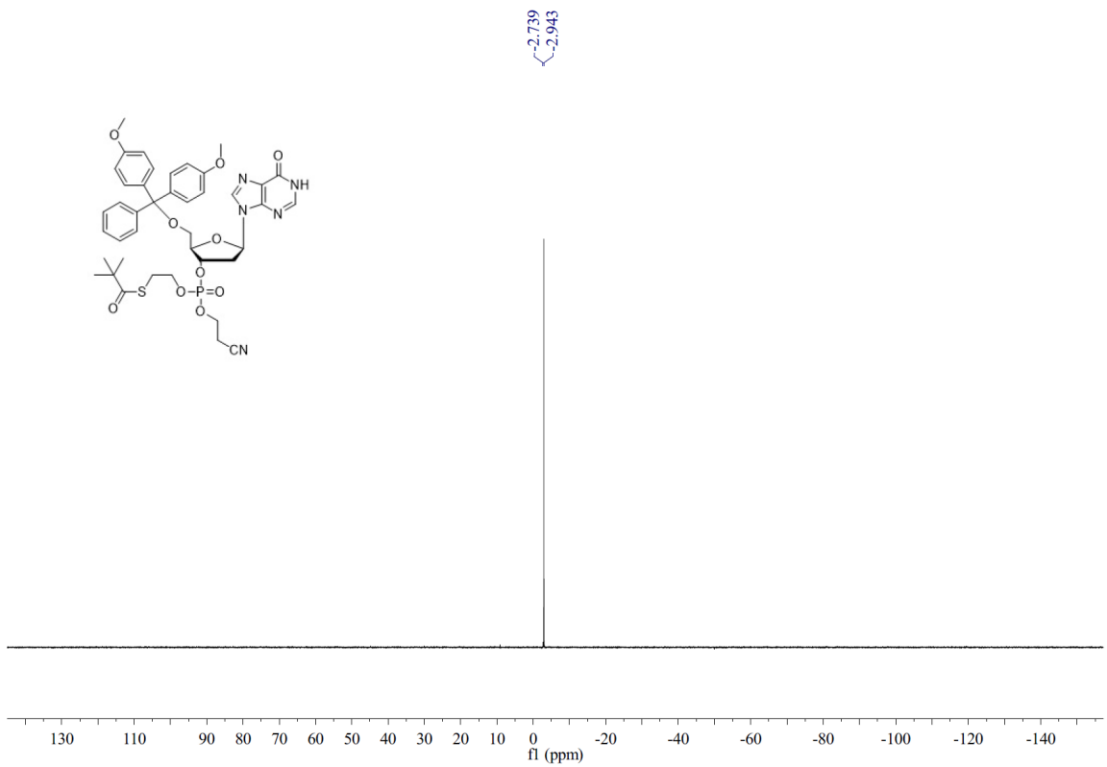

$^1\text{H}$ ,  $^{13}\text{C}$ ,  $^{31}\text{P}$  NMR of **9e**:

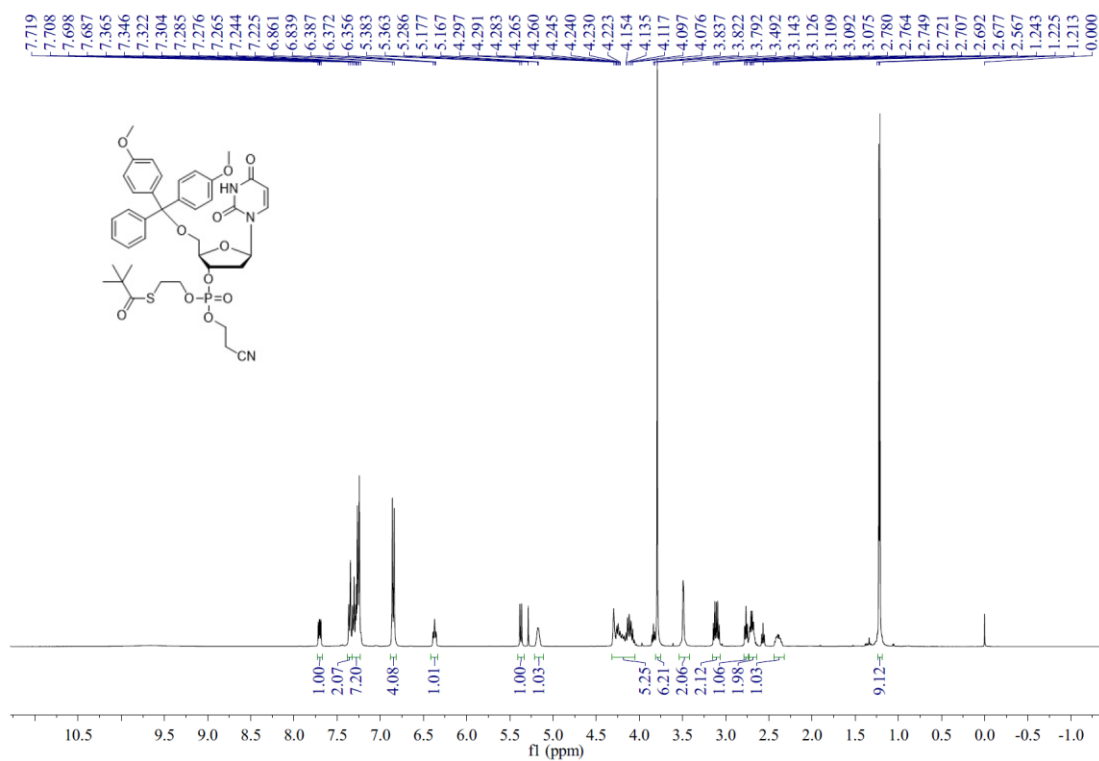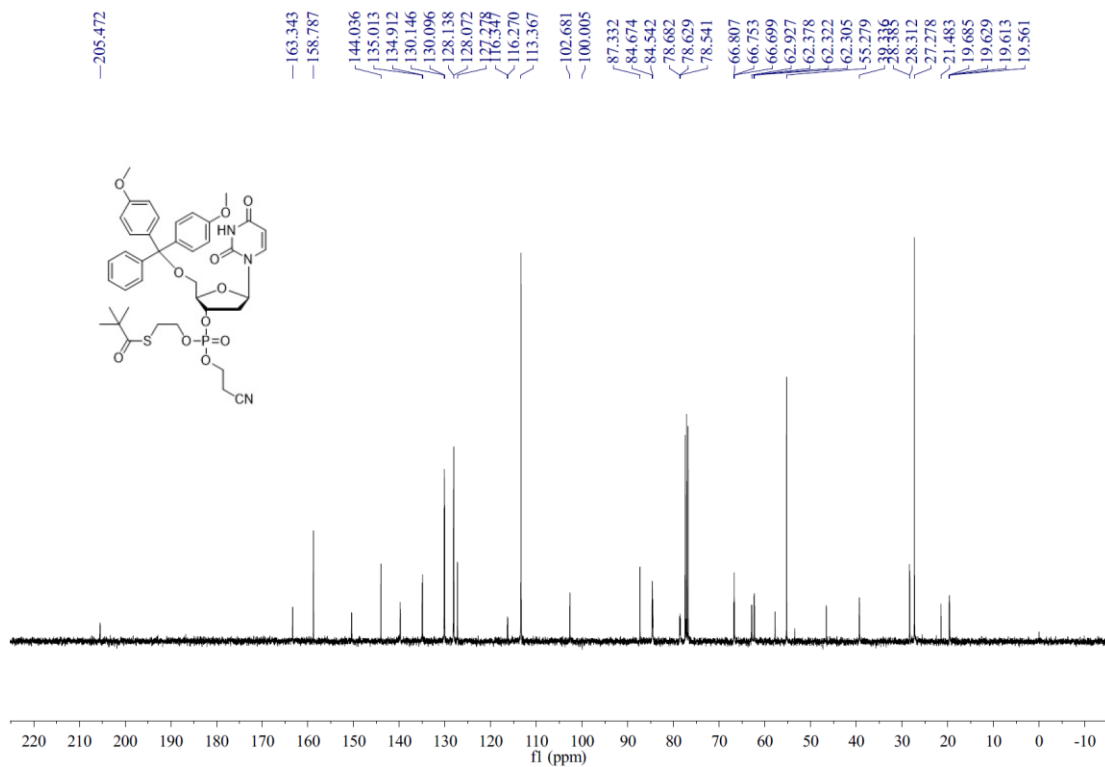

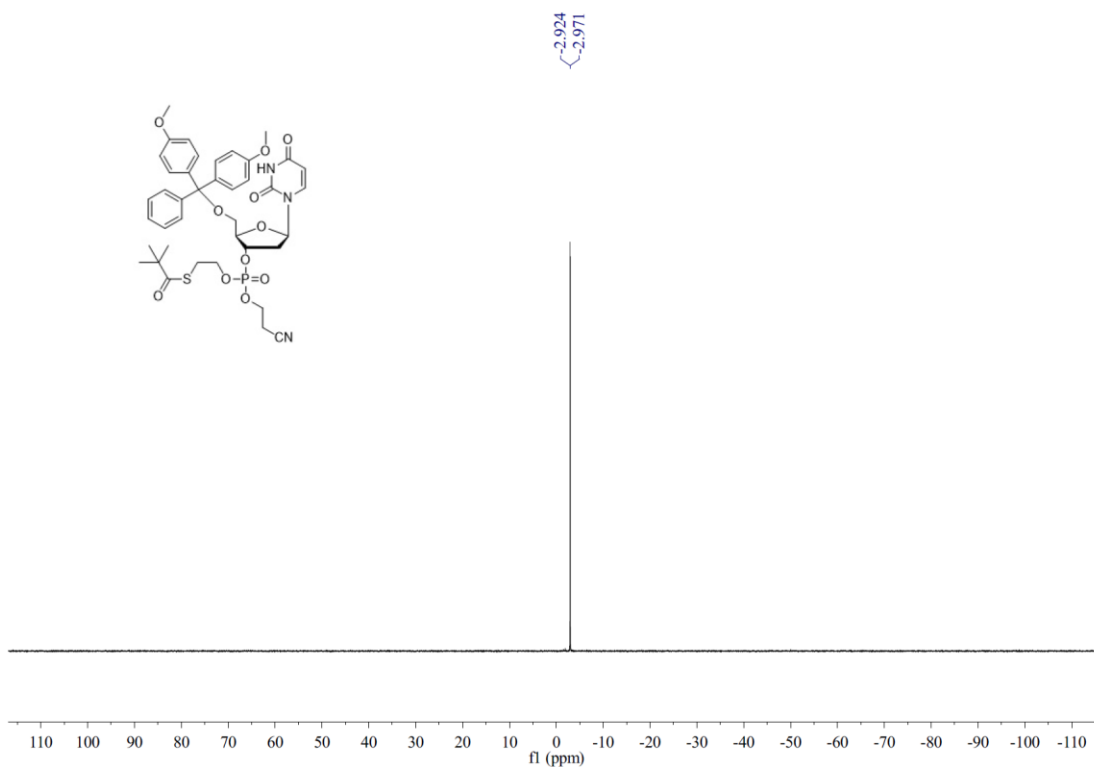

$^1\text{H}$ ,  $^{13}\text{C}$ ,  $^{31}\text{P}$  NMR of **9f**:

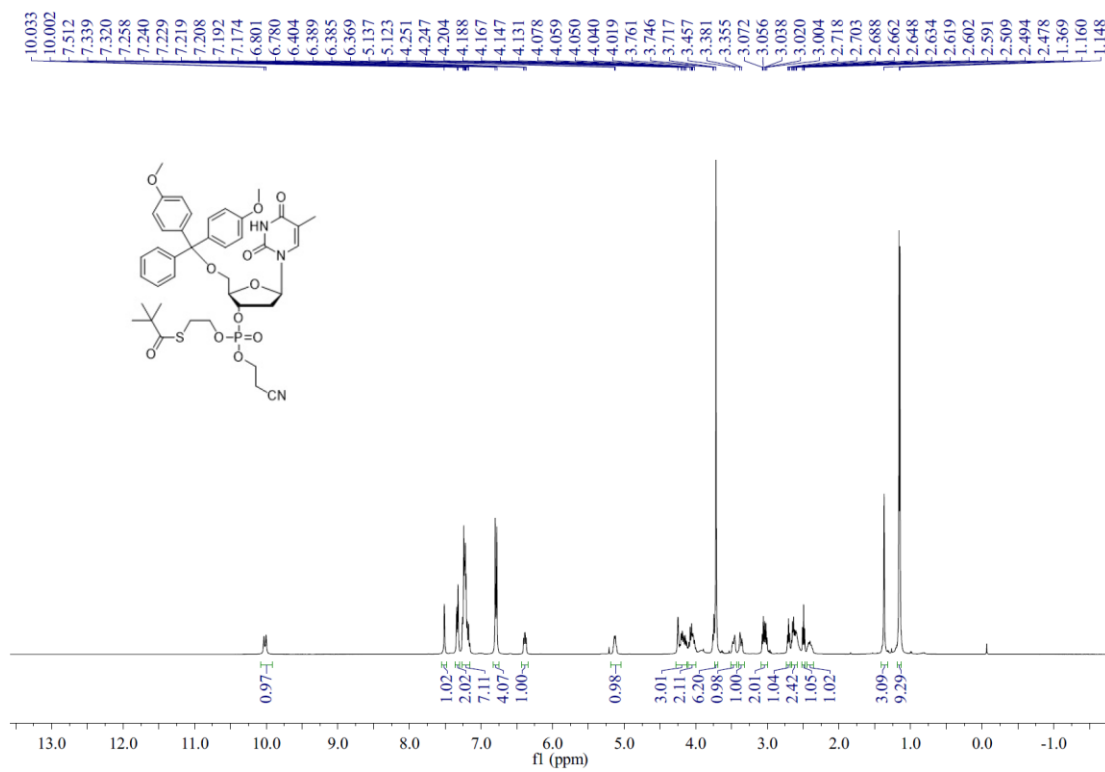

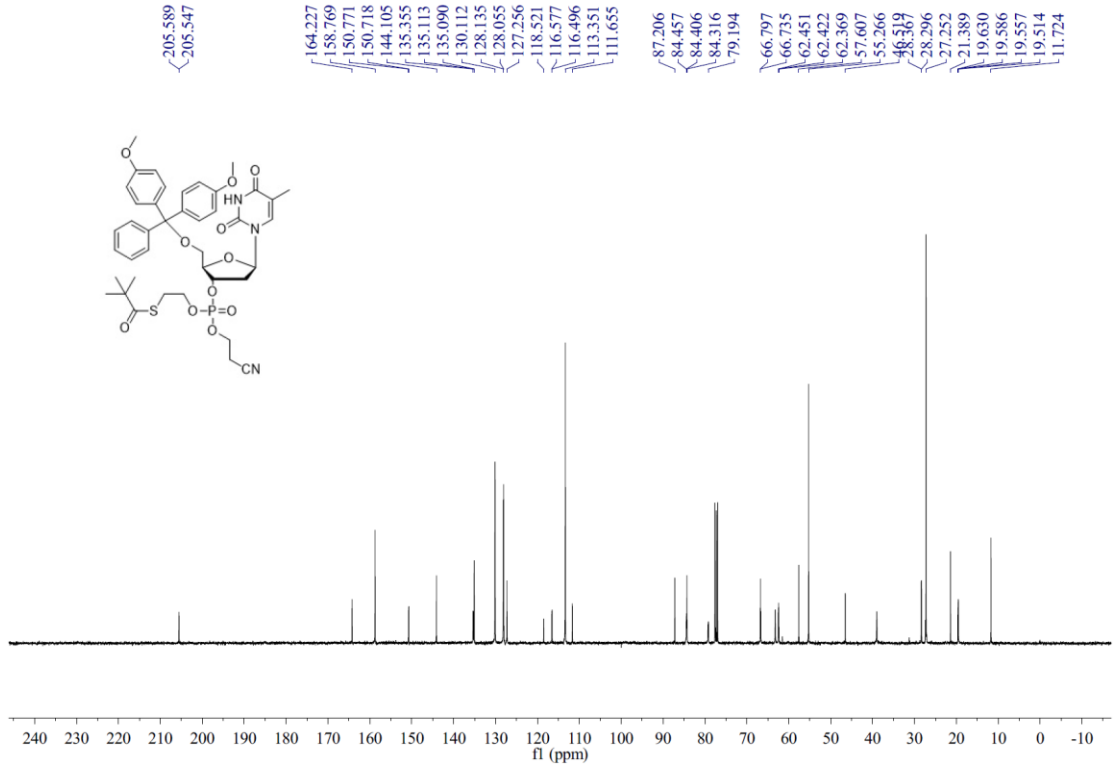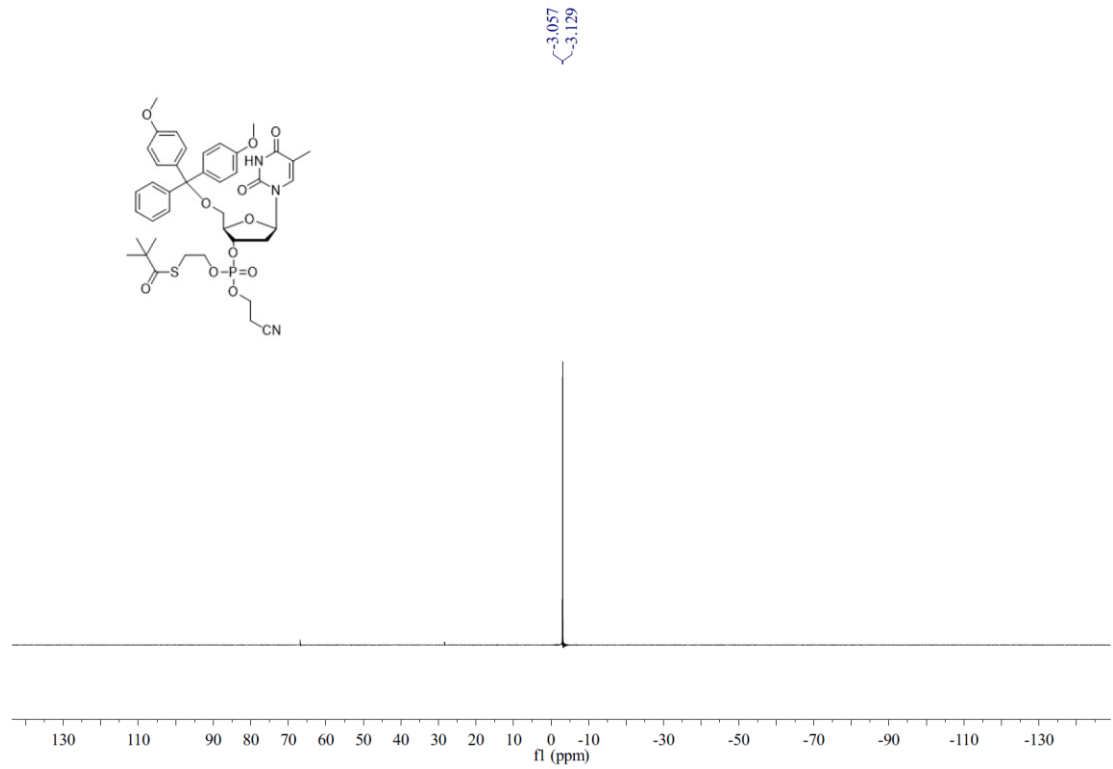



$^1\text{H}$ ,  $^{13}\text{C}$ ,  $^{31}\text{P}$  NMR of **10**:

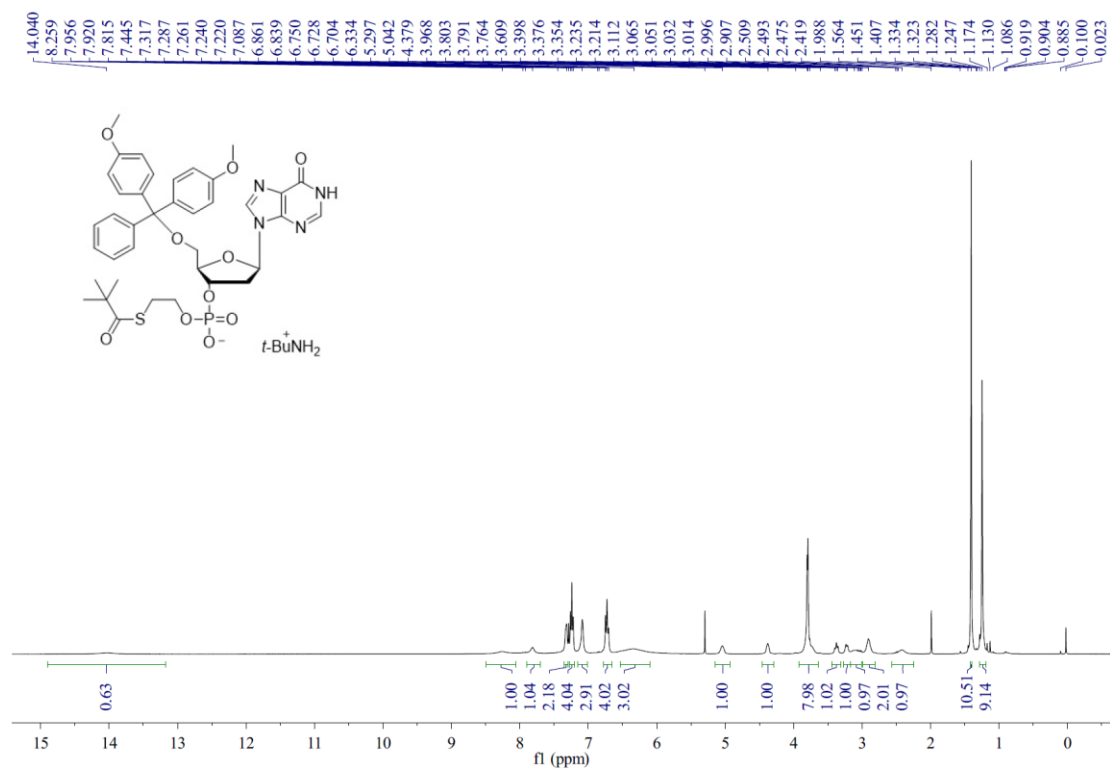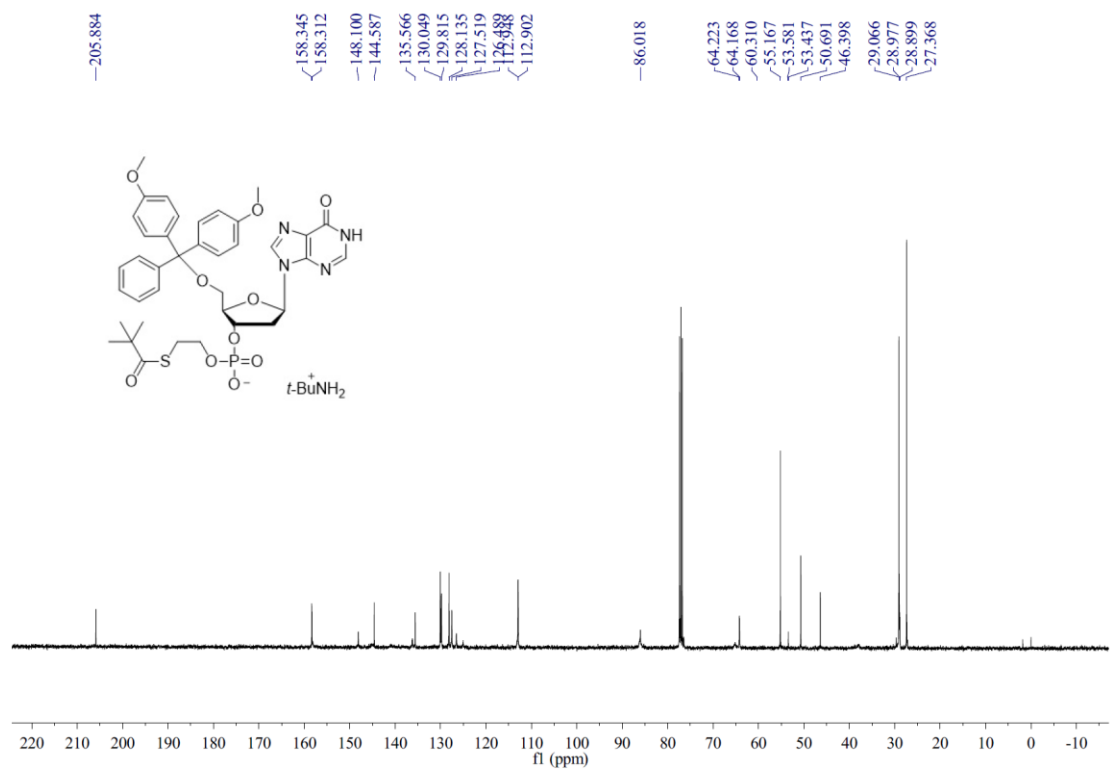

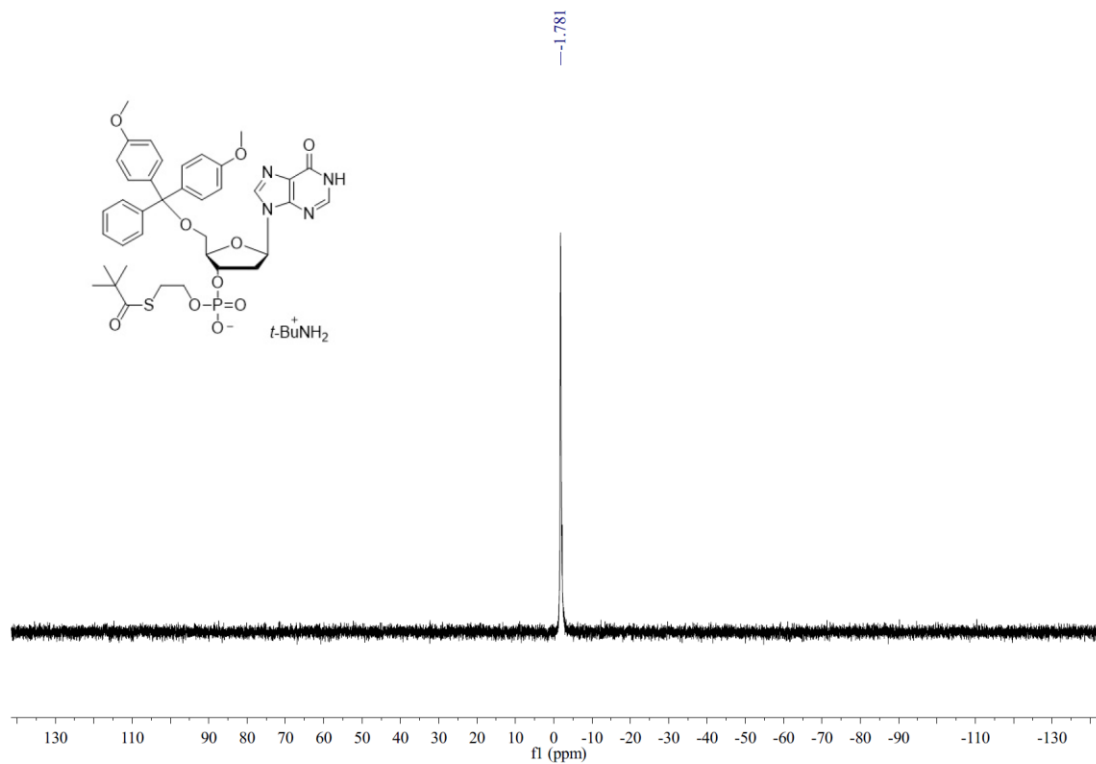

$^1\text{H}$ ,  $^{13}\text{C}$ ,  $^{31}\text{P}$  NMR of **11a**:

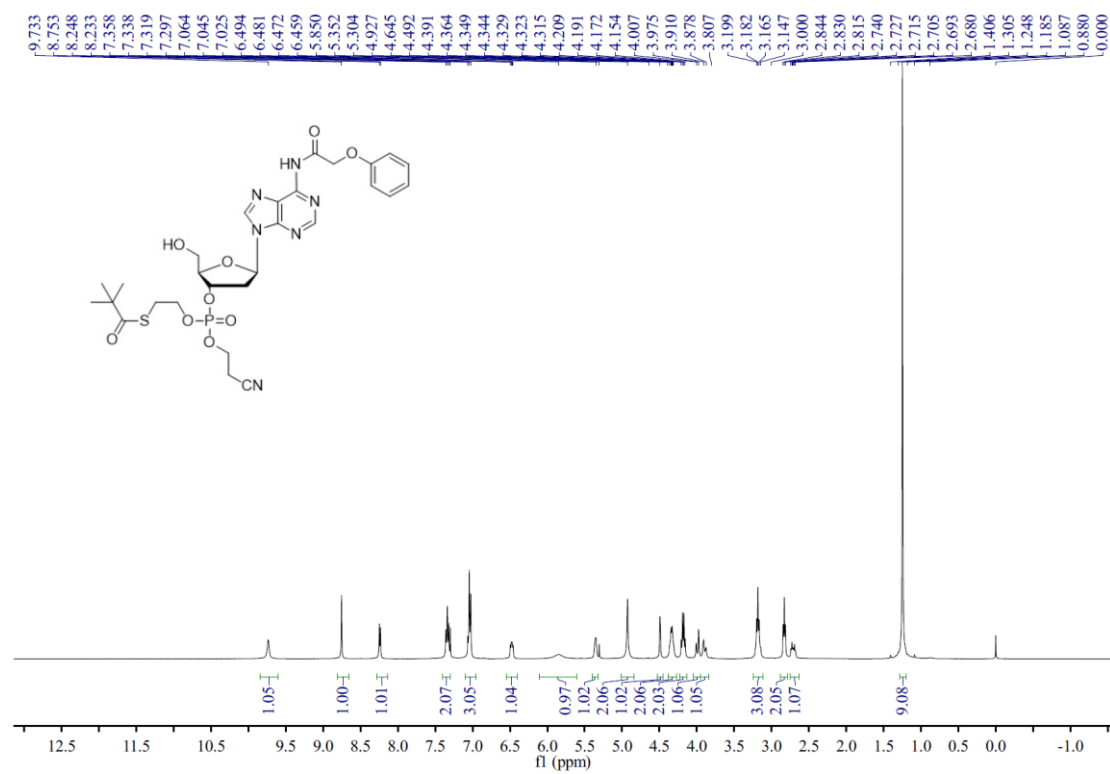

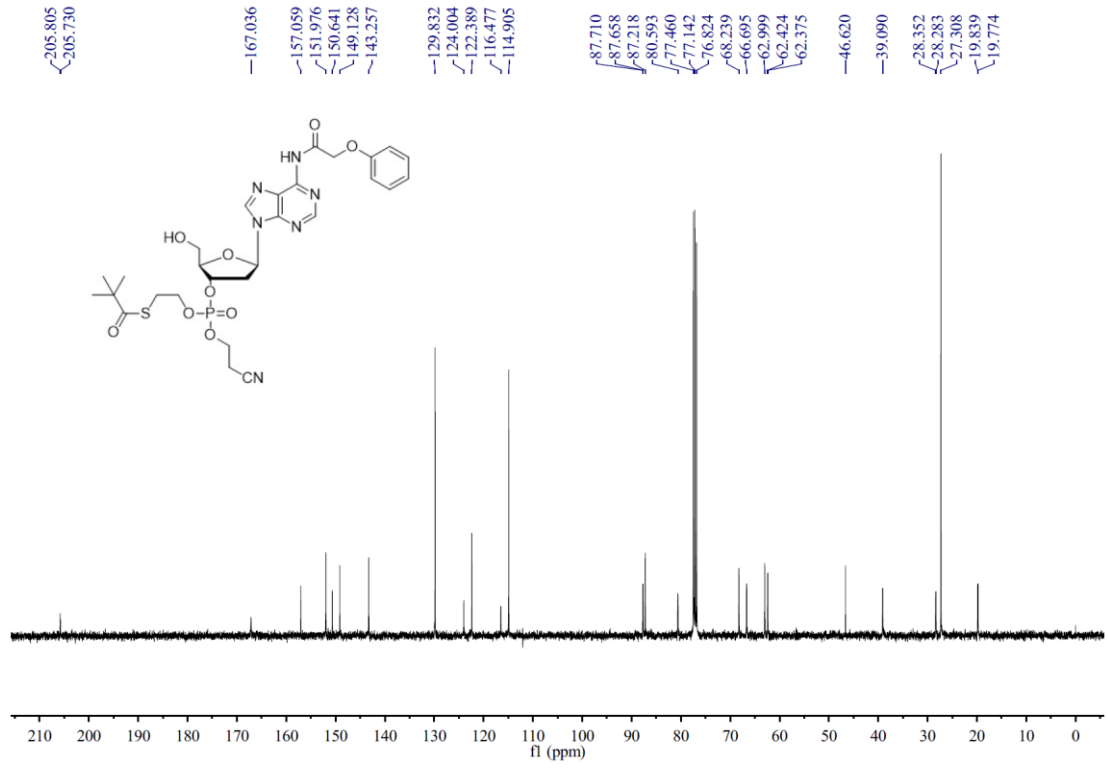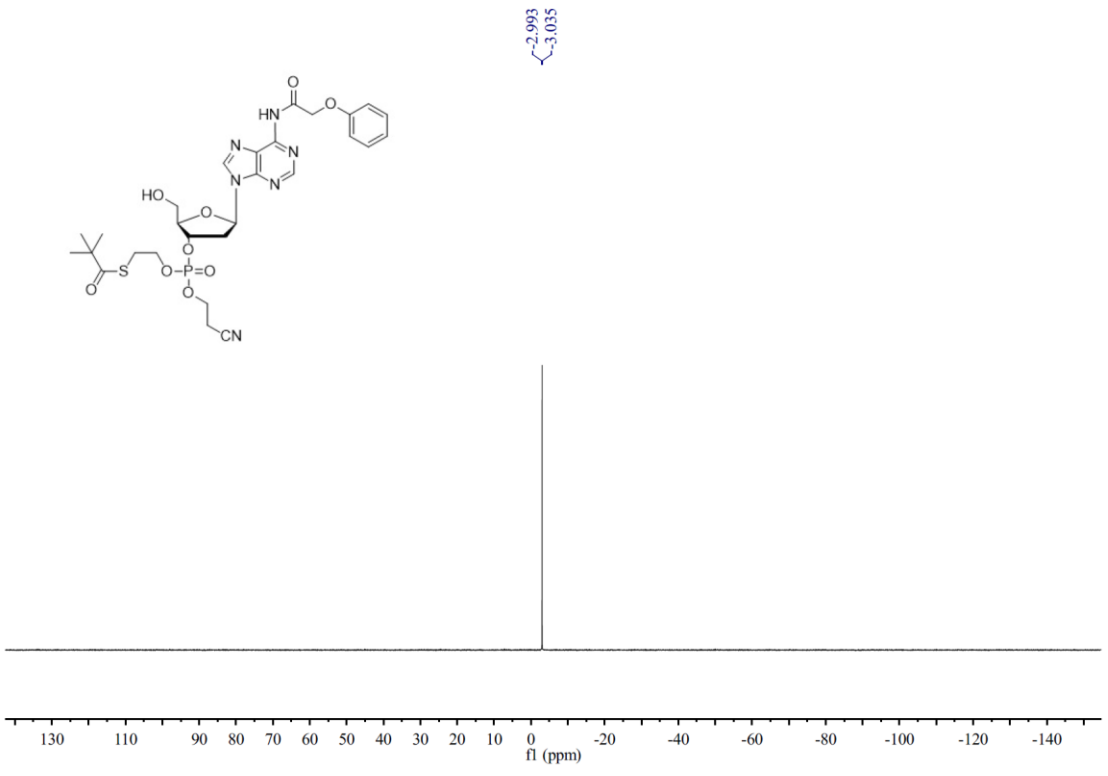

$^1\text{H}$ ,  $^{13}\text{C}$ ,  $^{31}\text{P}$  NMR of **11b**:

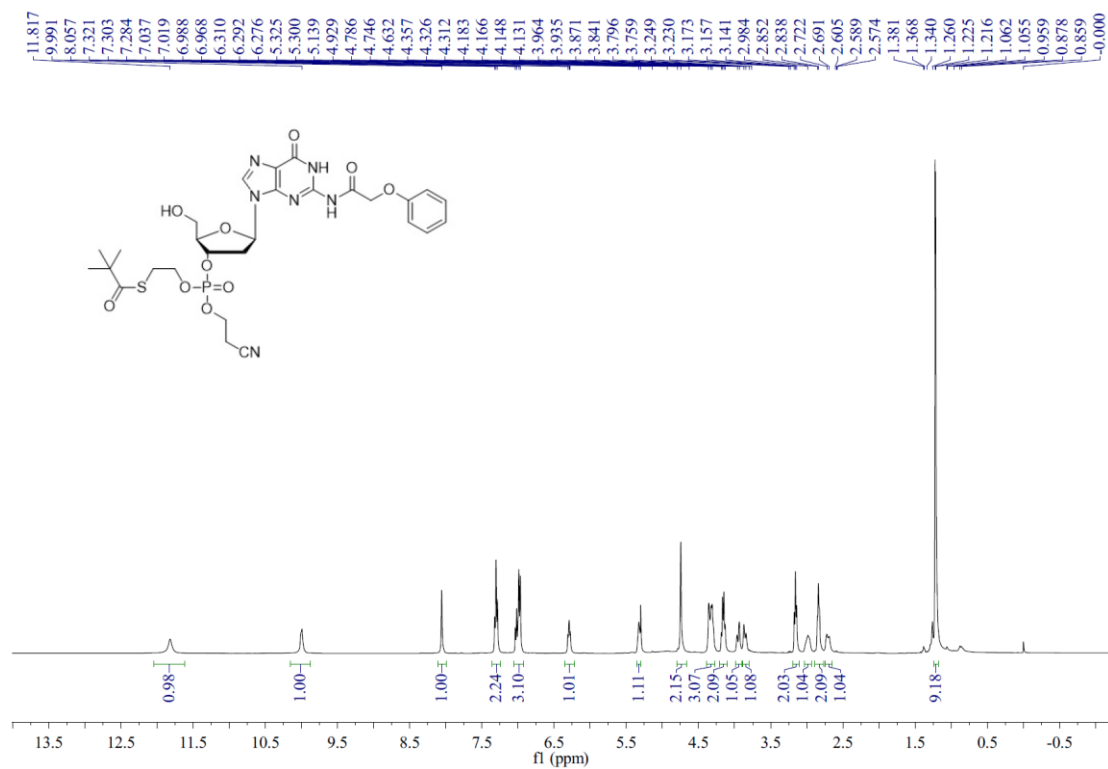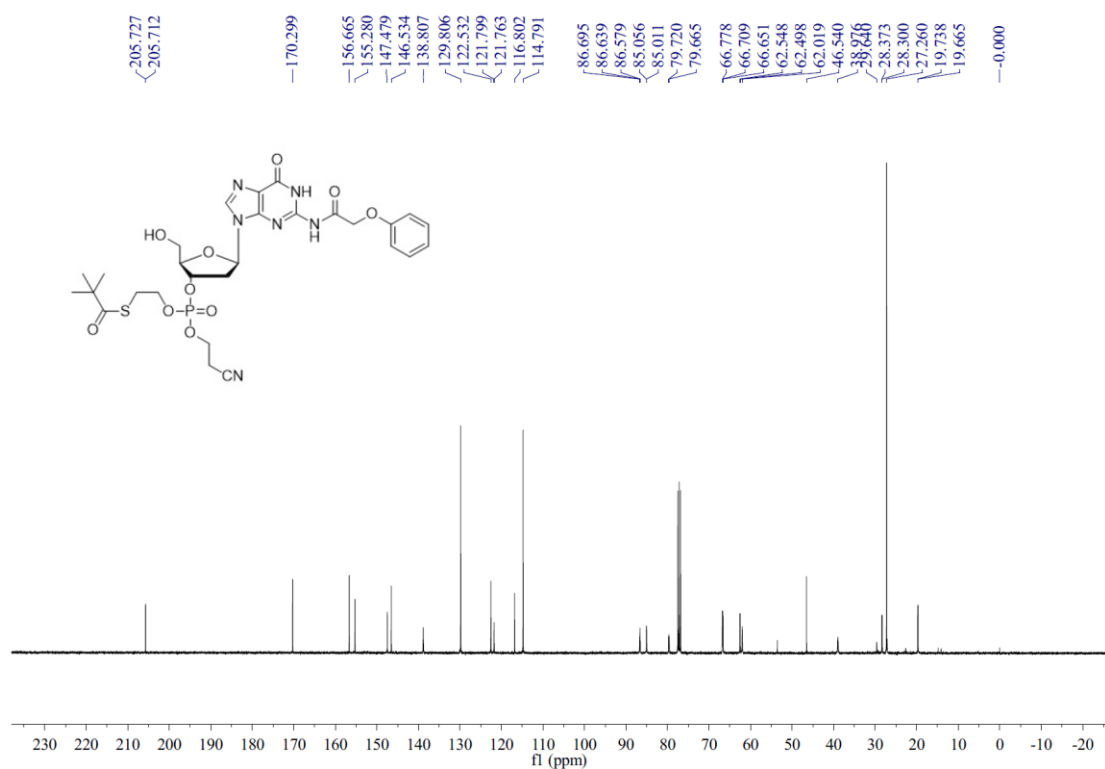

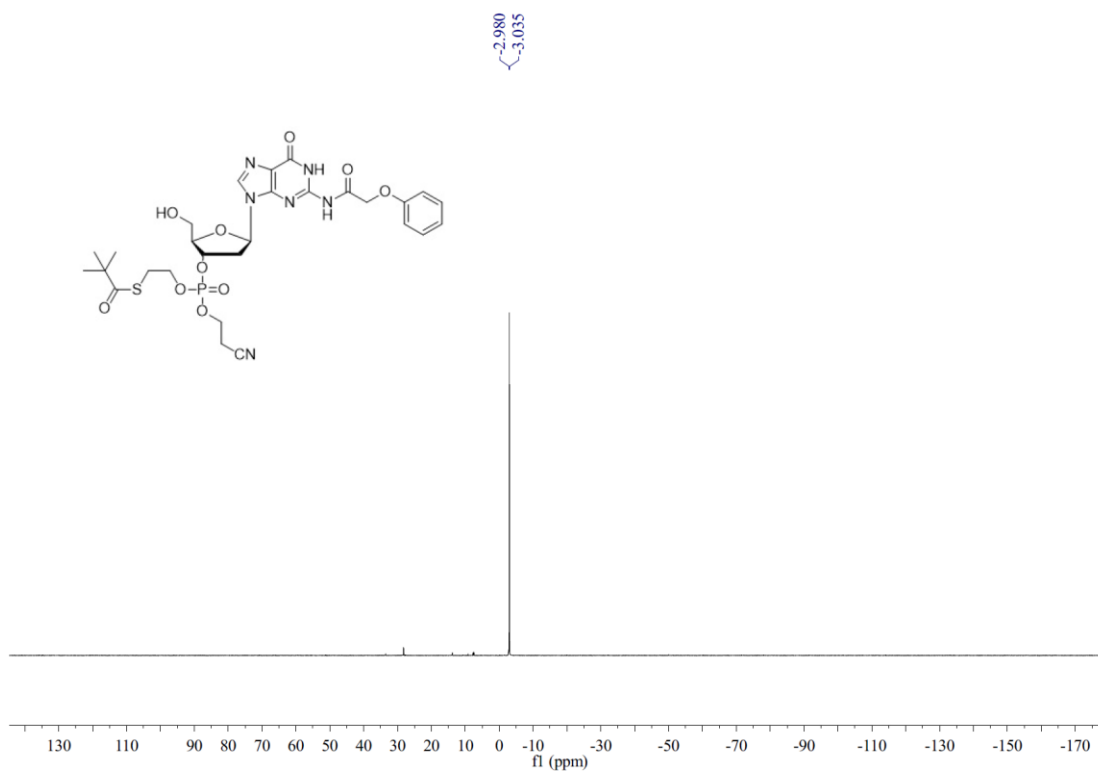

$^1\text{H}$ ,  $^{13}\text{C}$ ,  $^{31}\text{P}$  NMR of 11c:

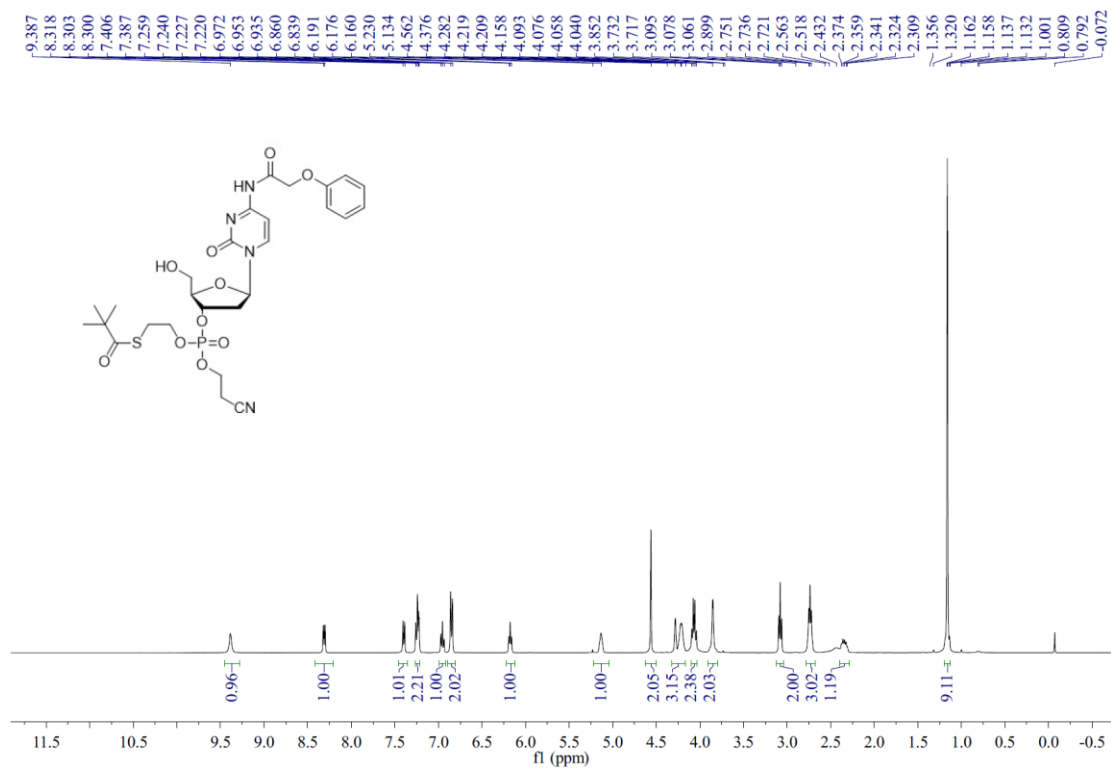

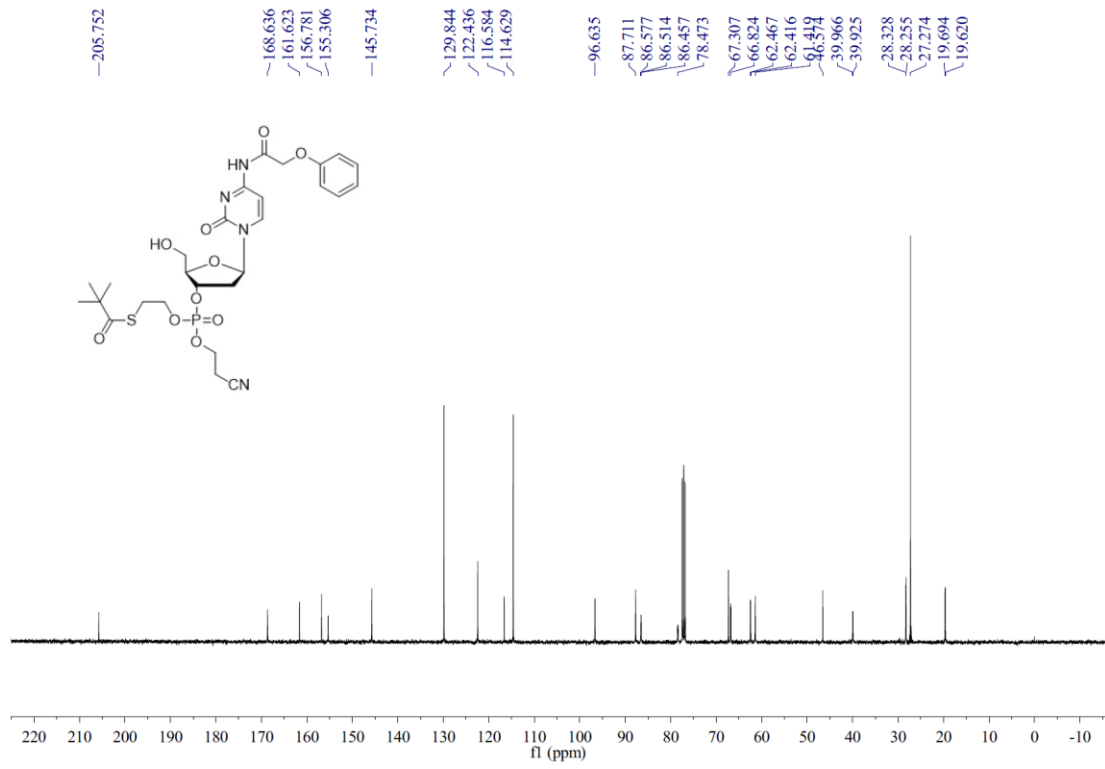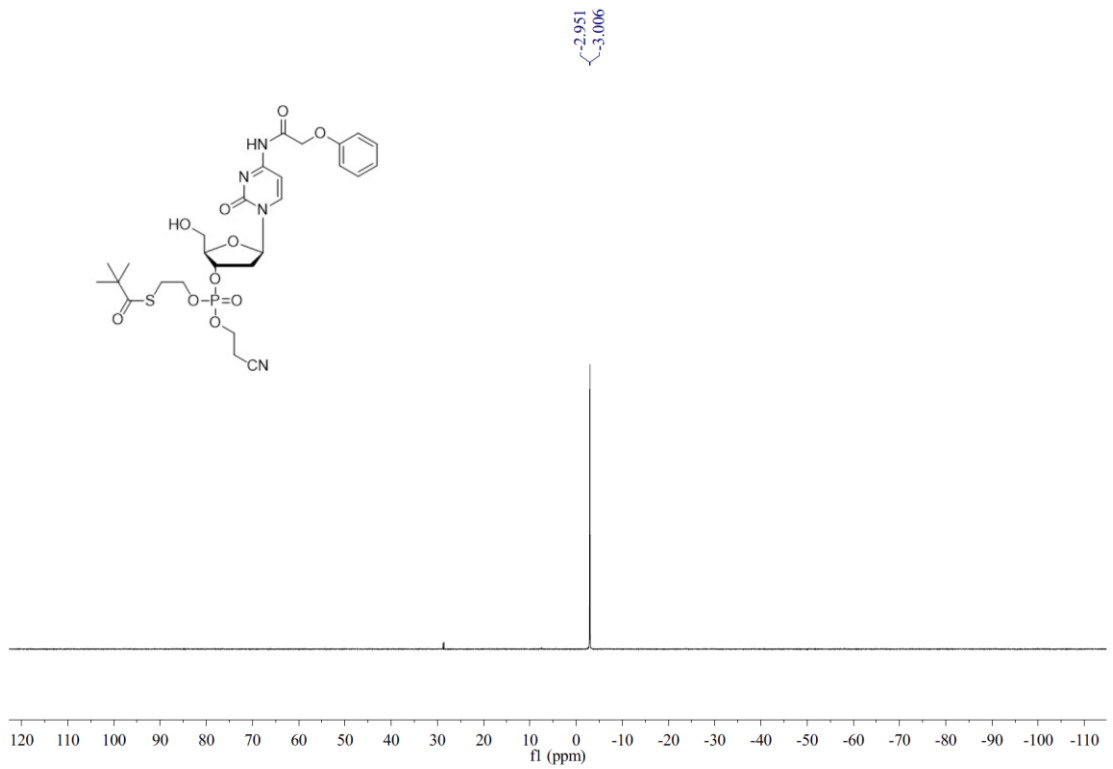

$^1\text{H}$ ,  $^{13}\text{C}$ ,  $^{31}\text{P}$  NMR of **11d**:

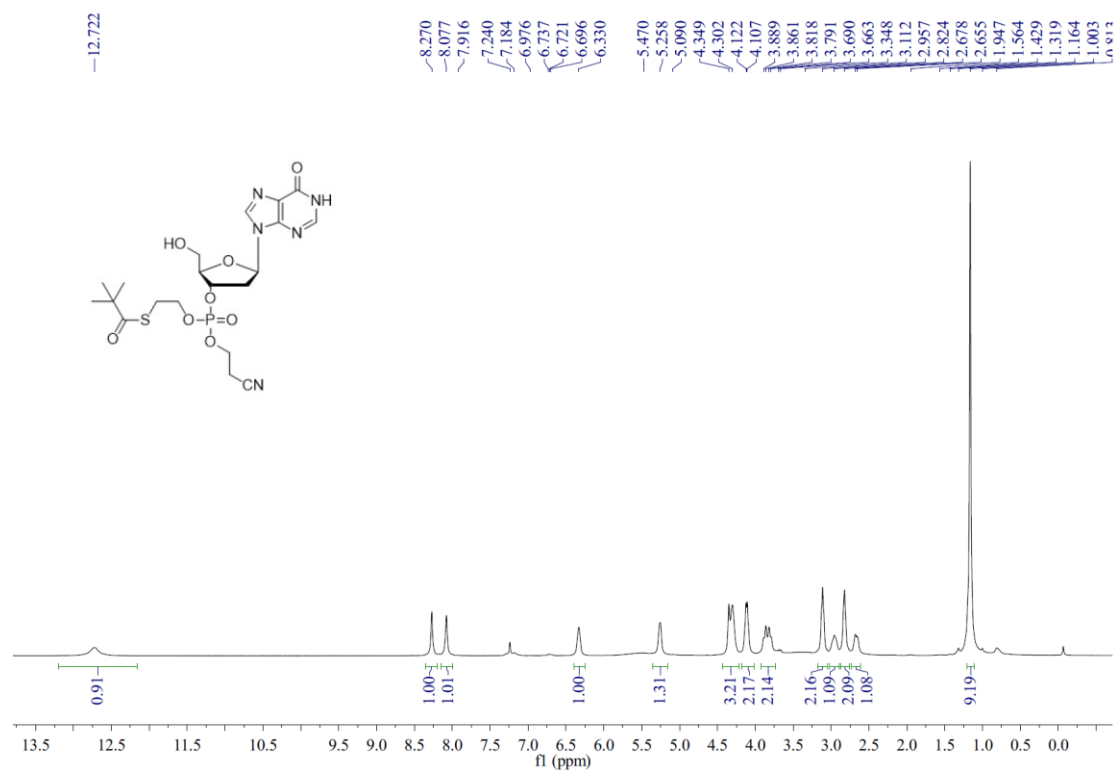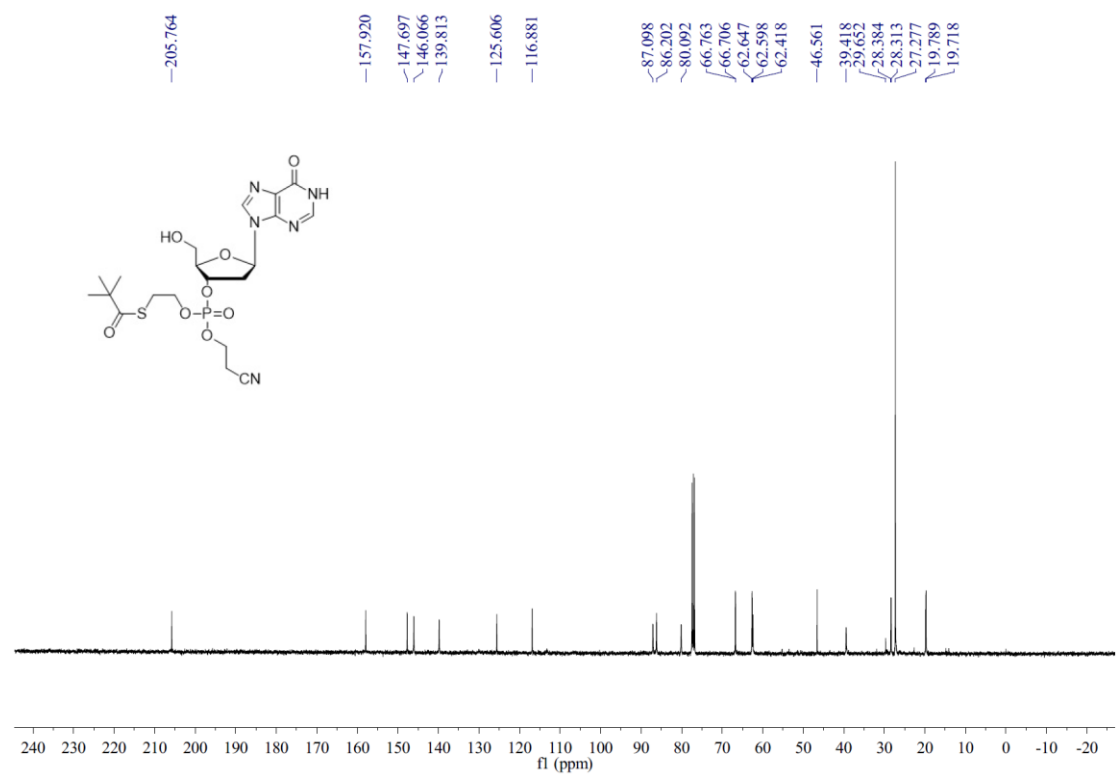

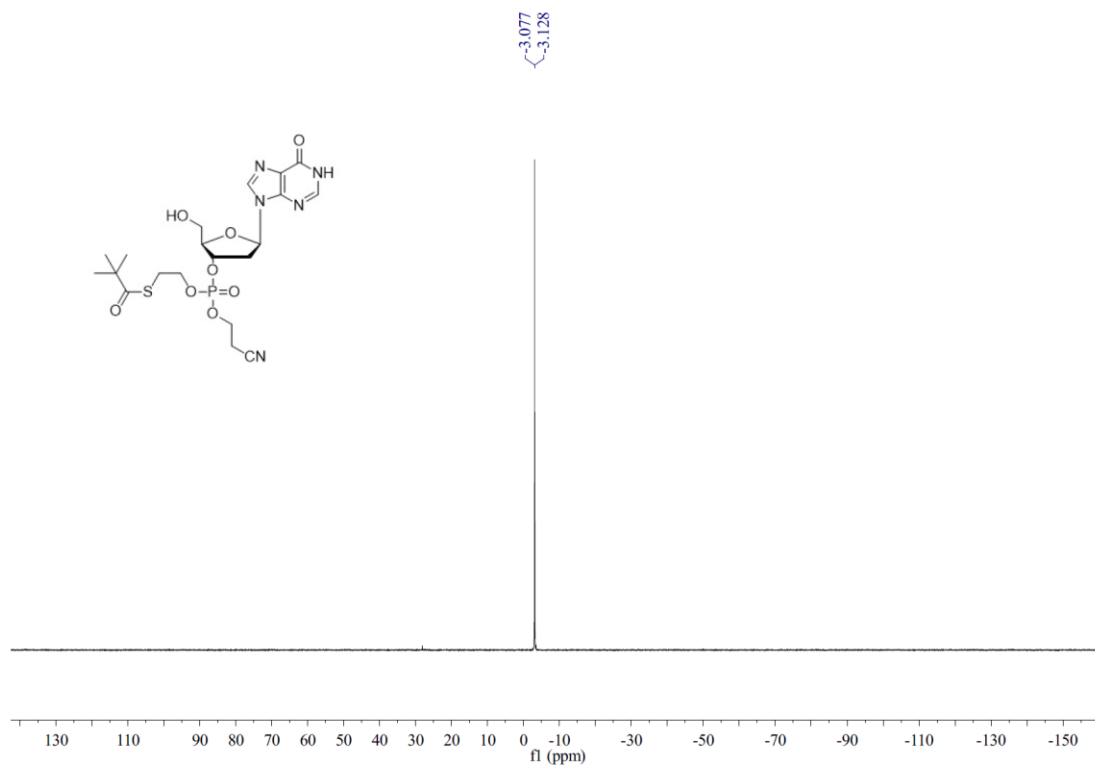

$^1\text{H}$ ,  $^{13}\text{C}$ ,  $^{31}\text{P}$  NMR of **11e**:

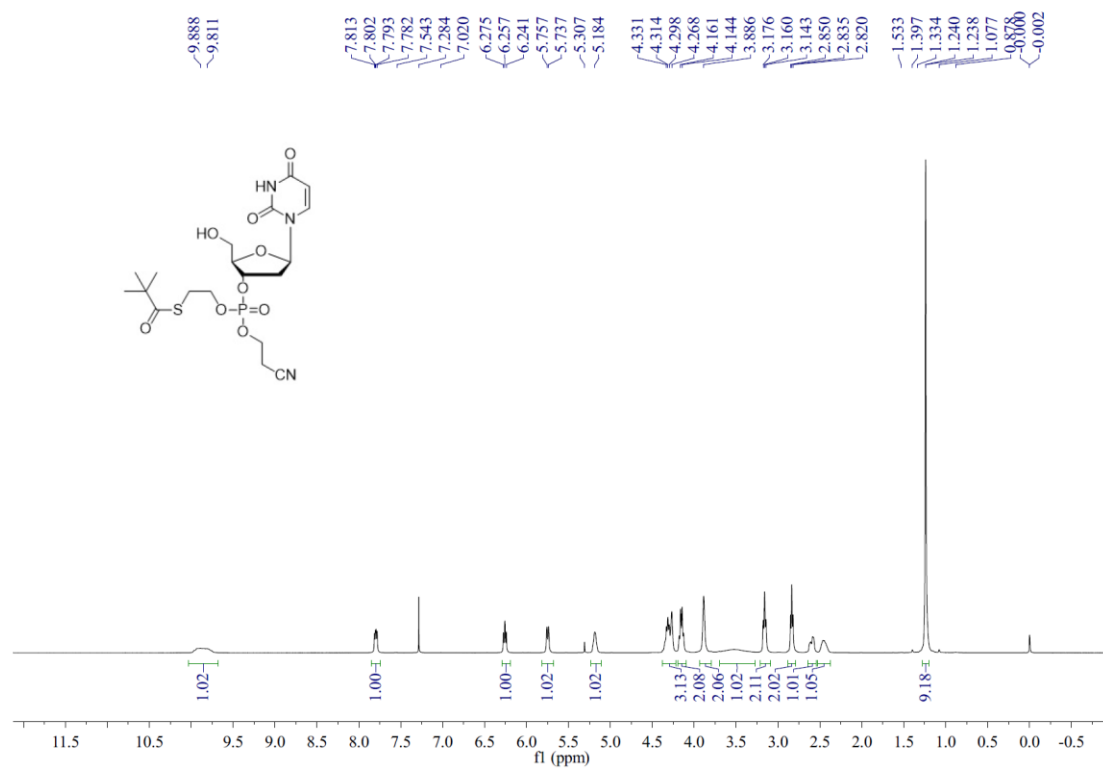



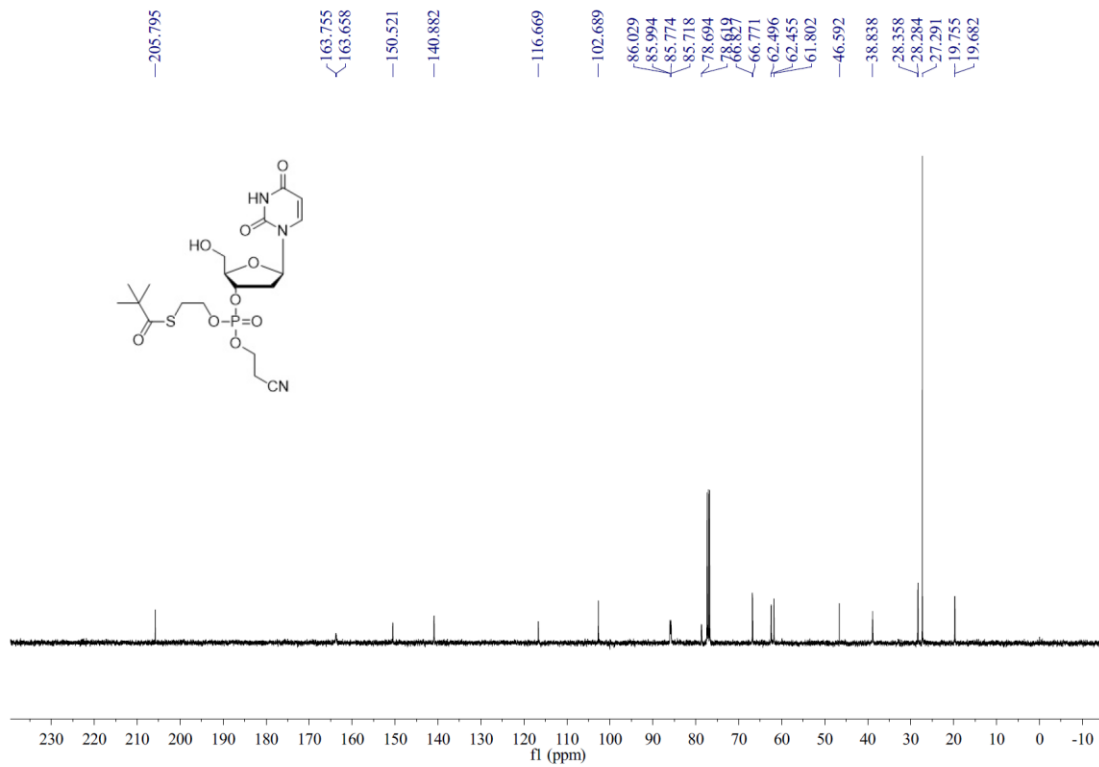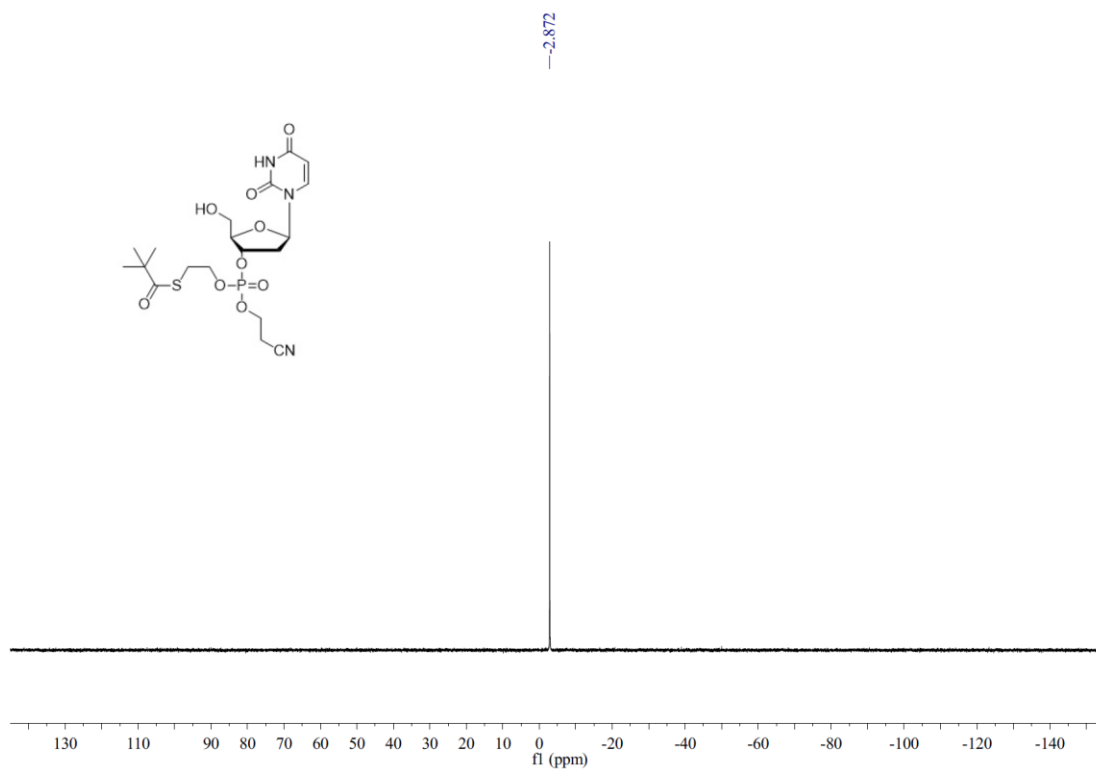

$^1\text{H}$ ,  $^{13}\text{C}$ ,  $^{31}\text{P}$  NMR of **11f**:

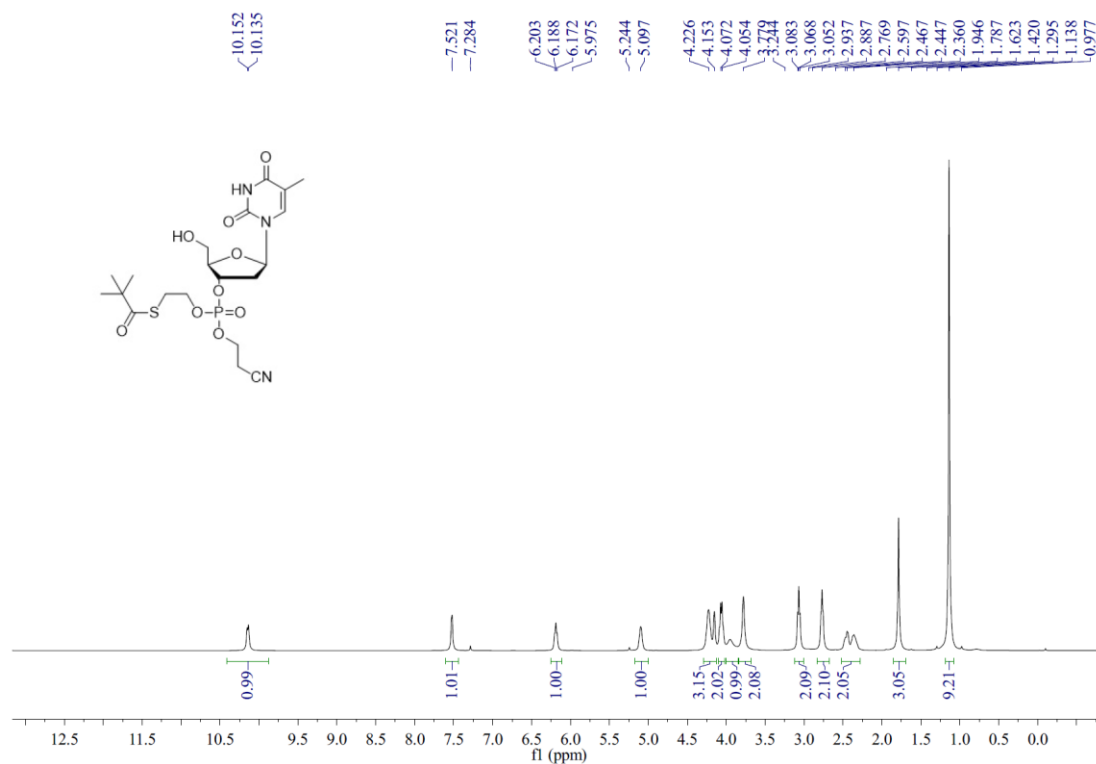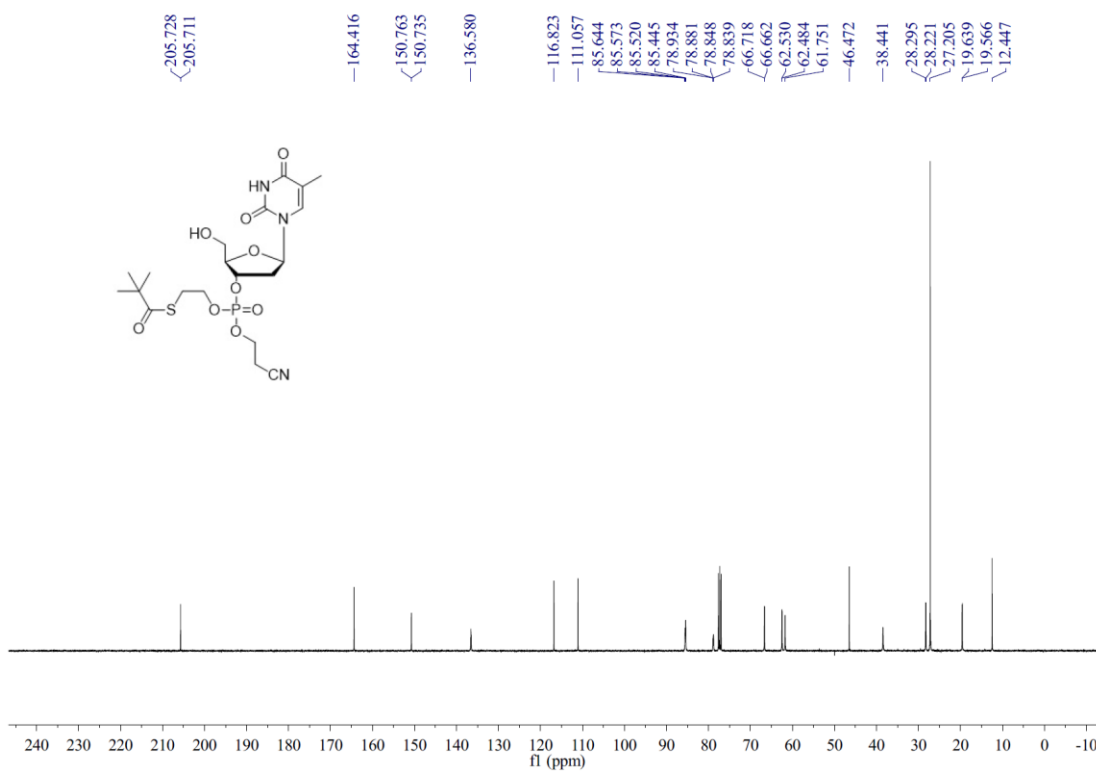

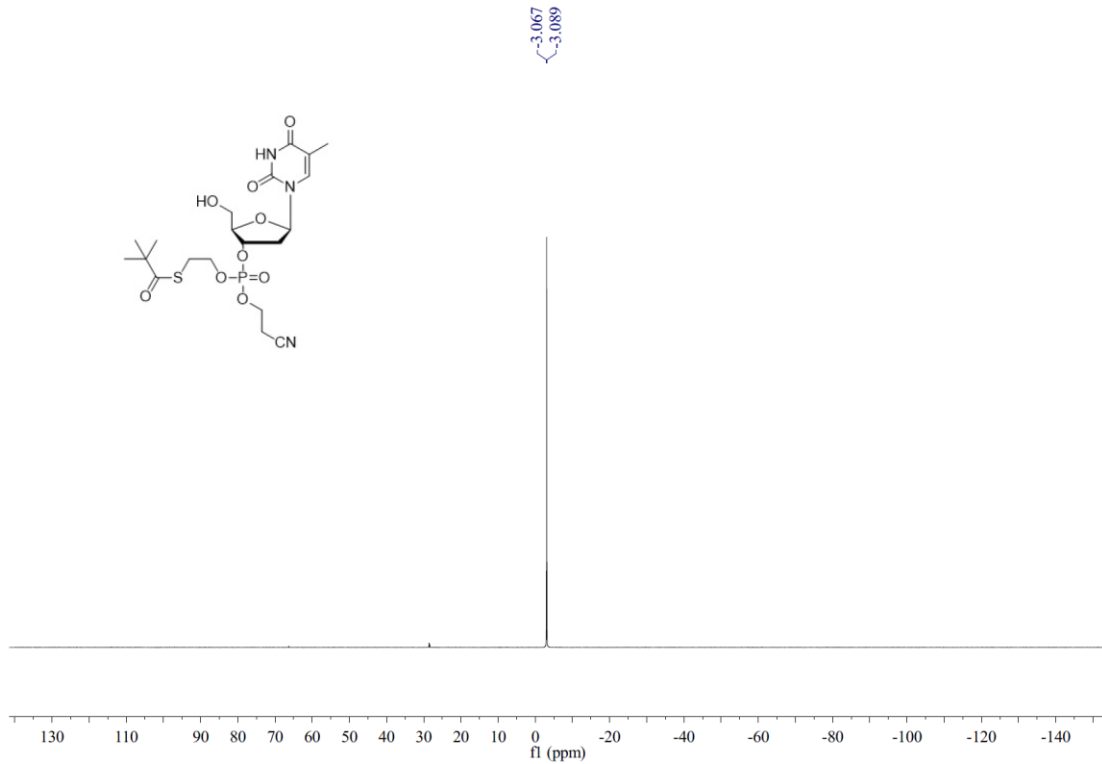

<sup>1</sup>H, <sup>13</sup>C, <sup>31</sup>P NMR of 12a:

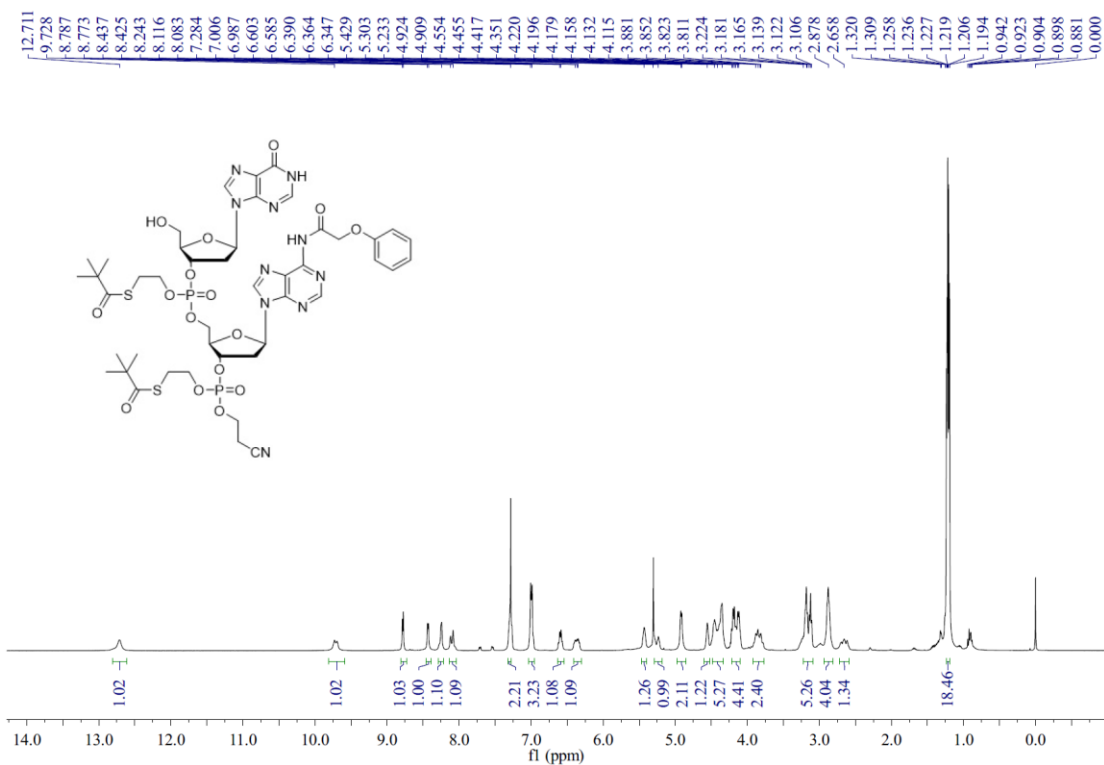

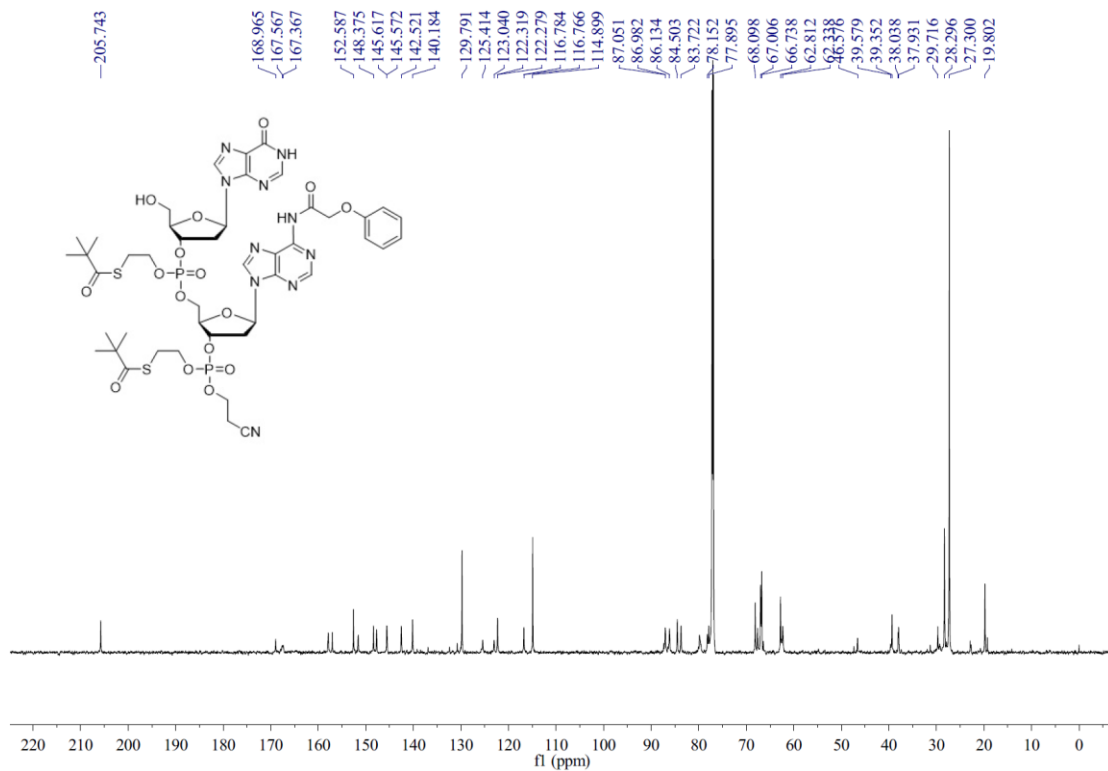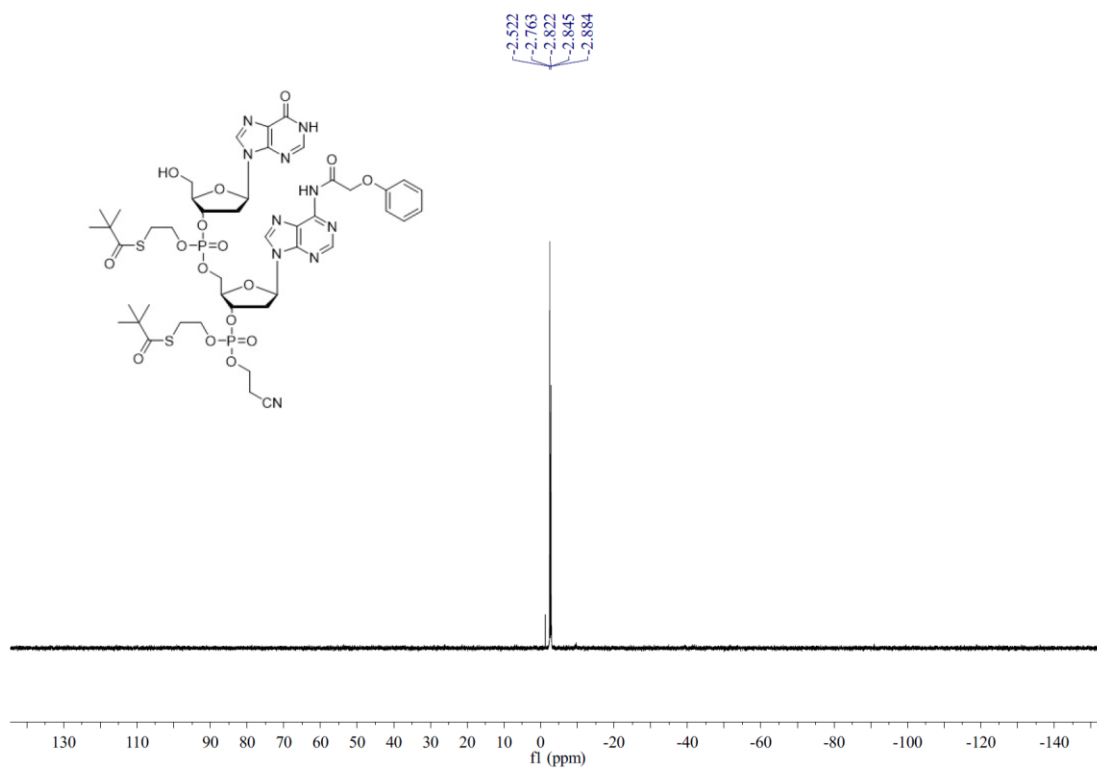

$^1\text{H}$ ,  $^{13}\text{C}$ ,  $^{31}\text{P}$  NMR of **12b**:

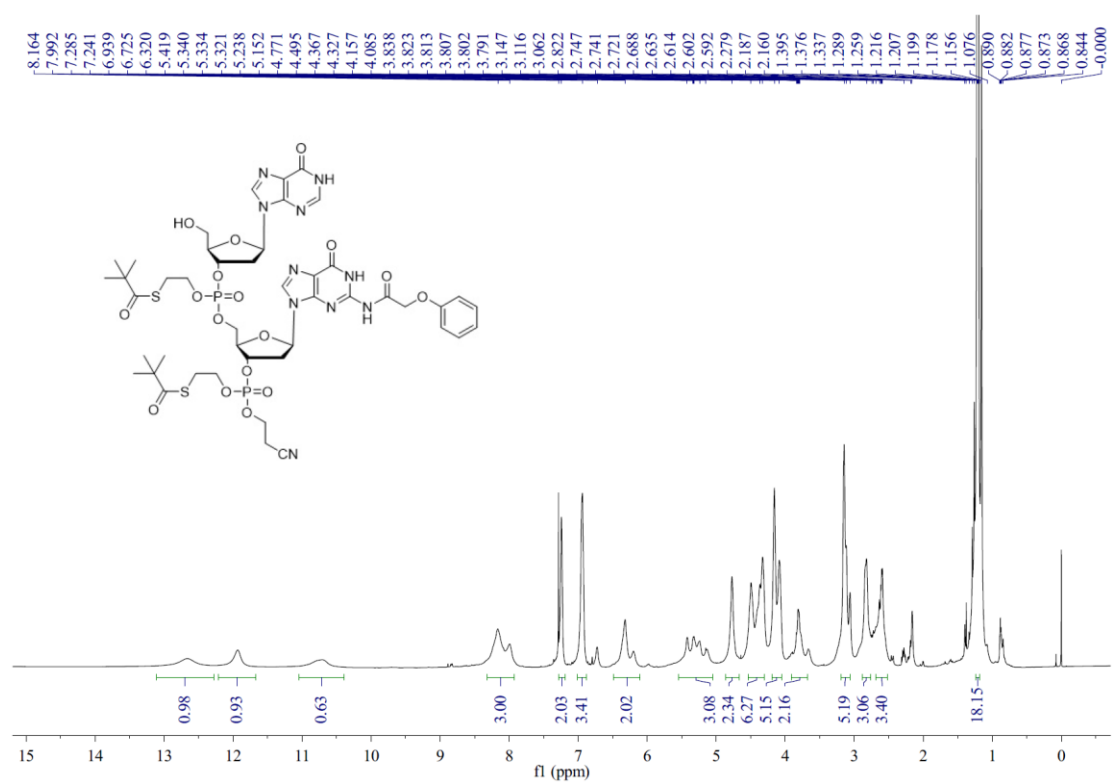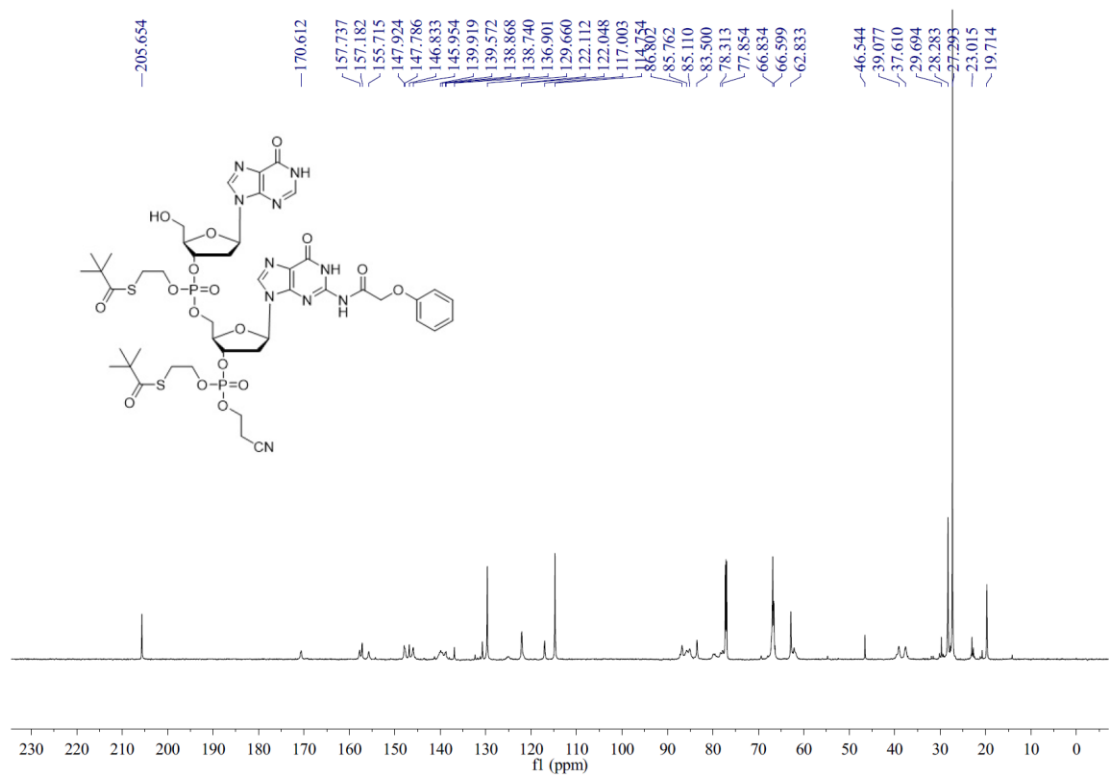

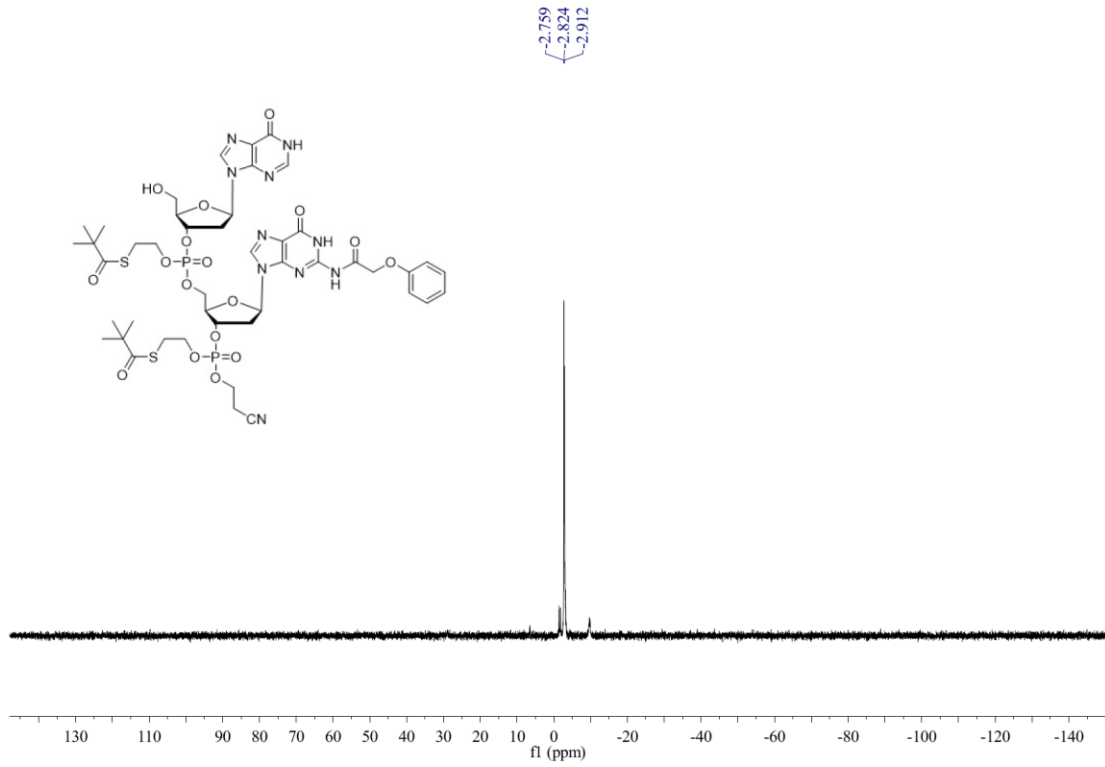

$^1\text{H}$ ,  $^{13}\text{C}$ ,  $^{31}\text{P}$  NMR of 12c:

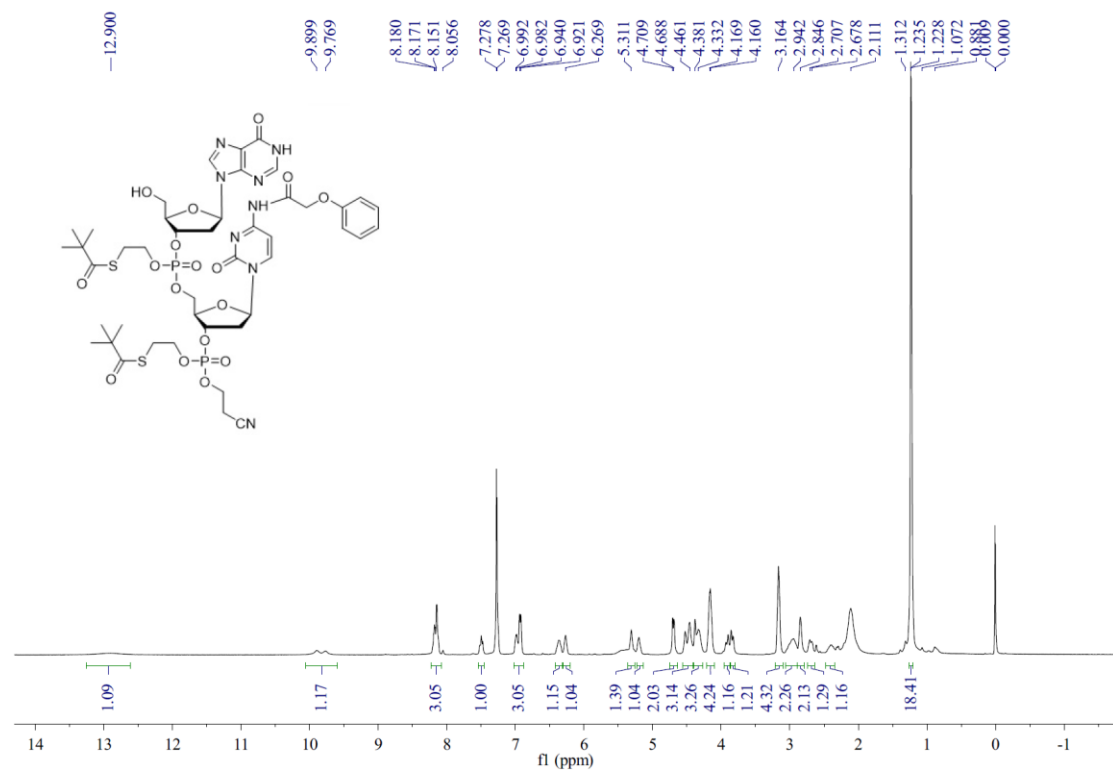

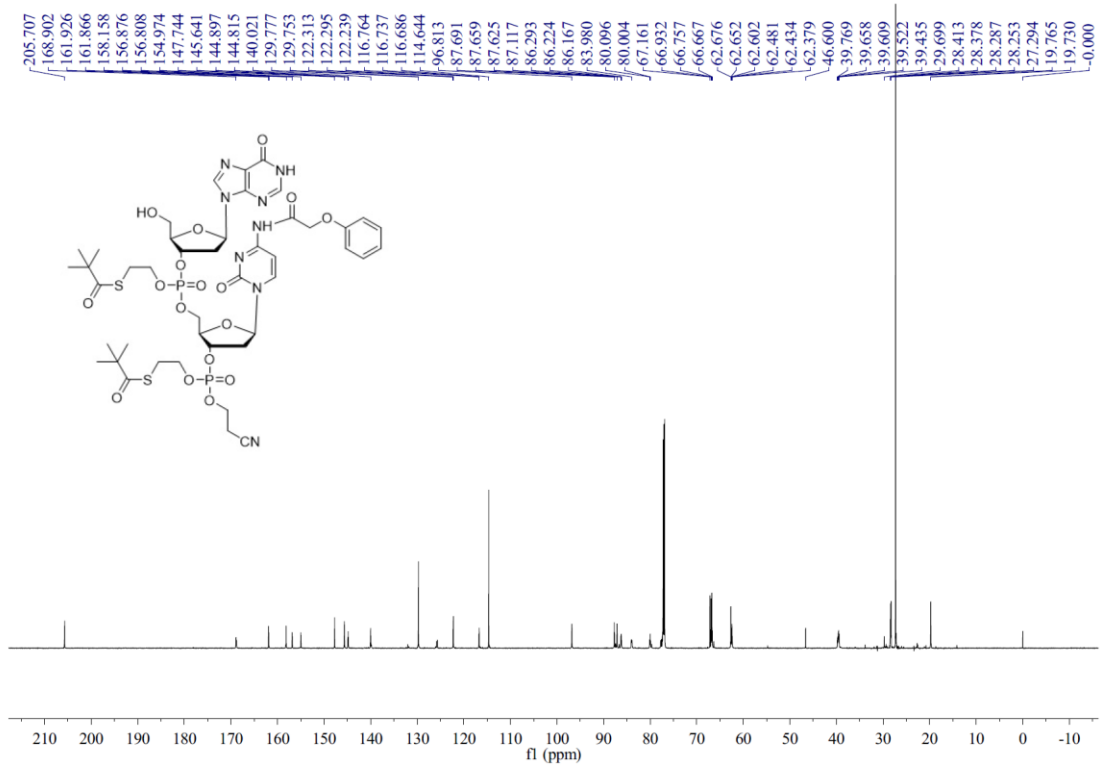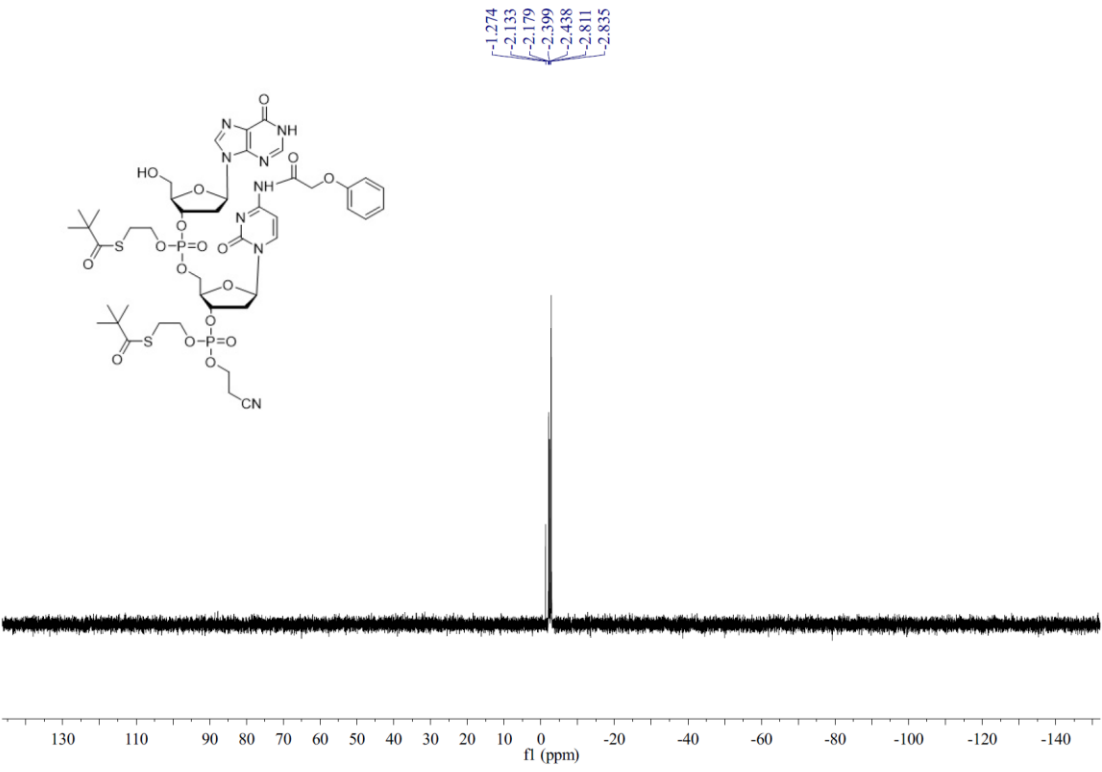

$^1\text{H}$ ,  $^{13}\text{C}$ ,  $^{31}\text{P}$  NMR of **12d**:

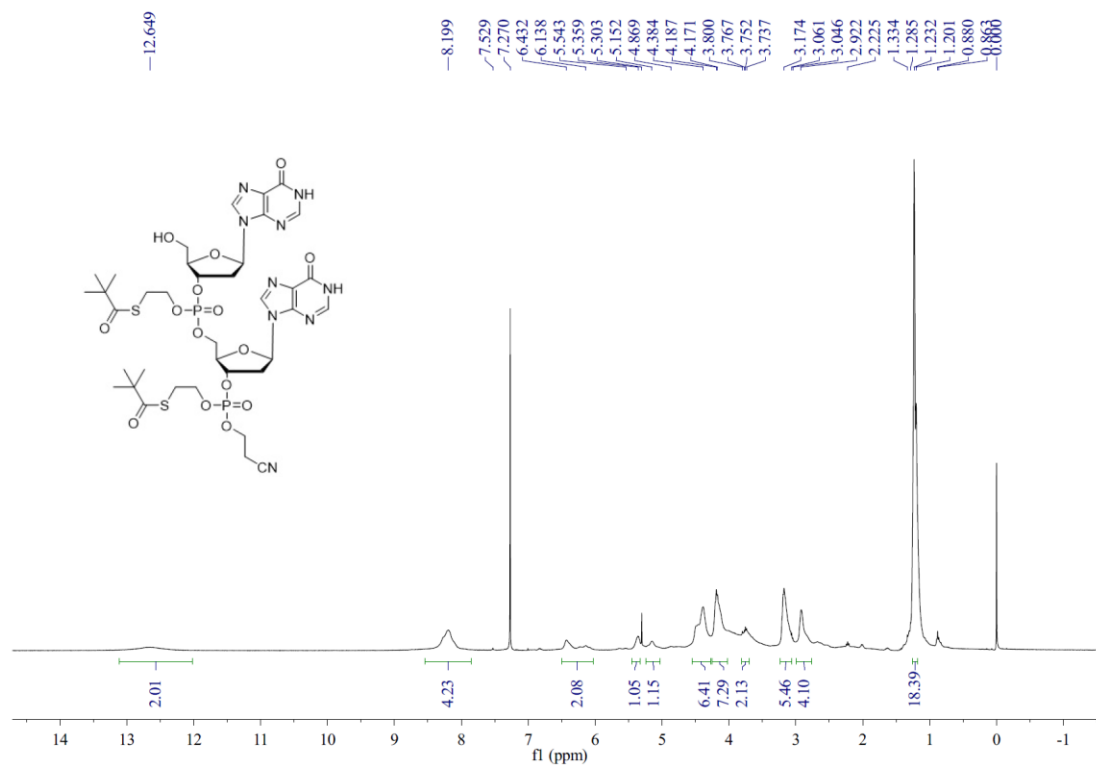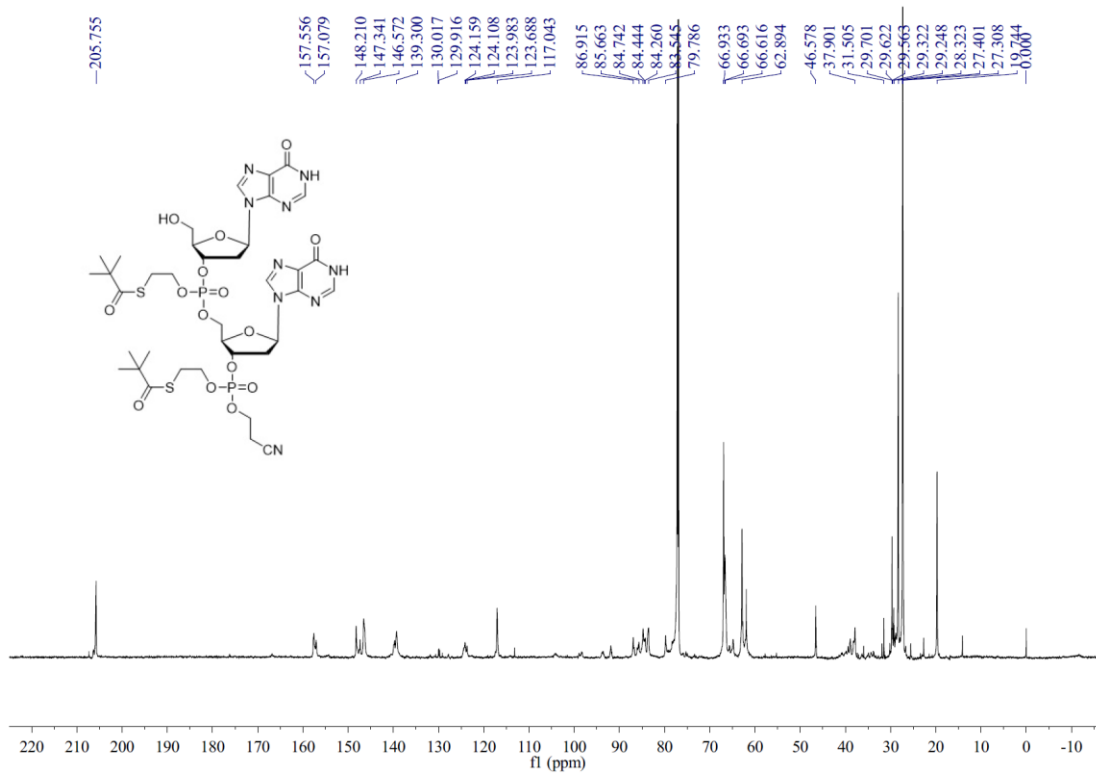



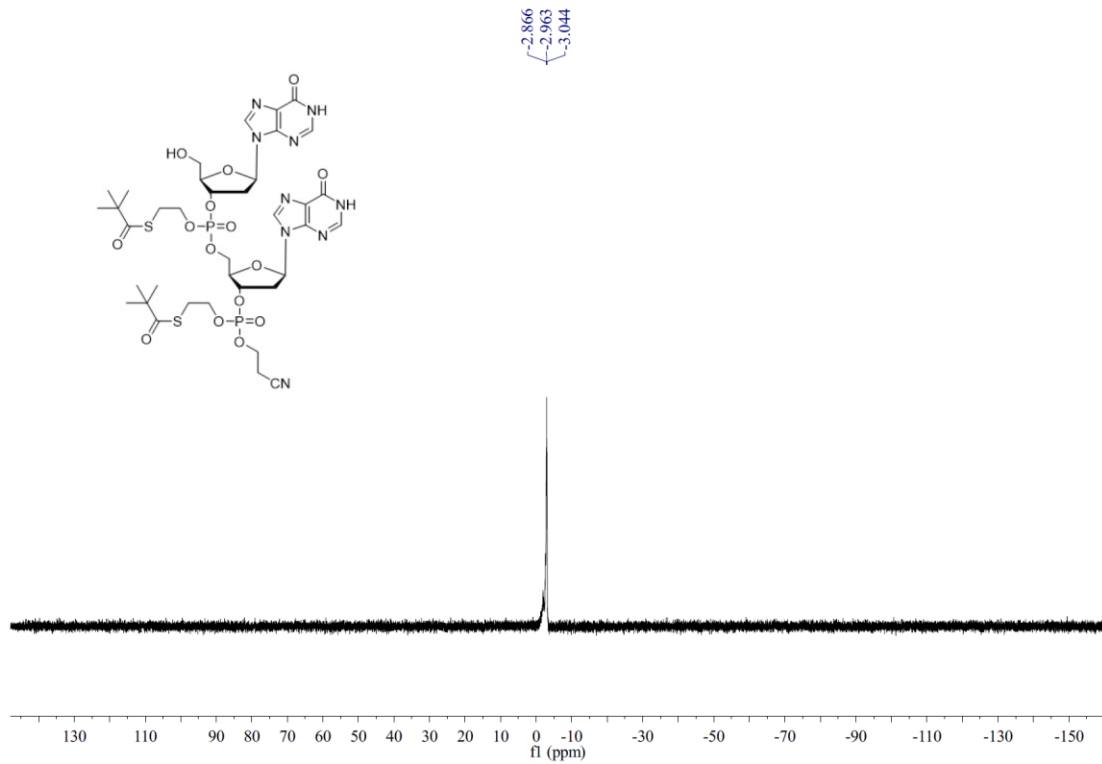

<sup>1</sup>H, <sup>13</sup>C, <sup>31</sup>P NMR of **12c**:

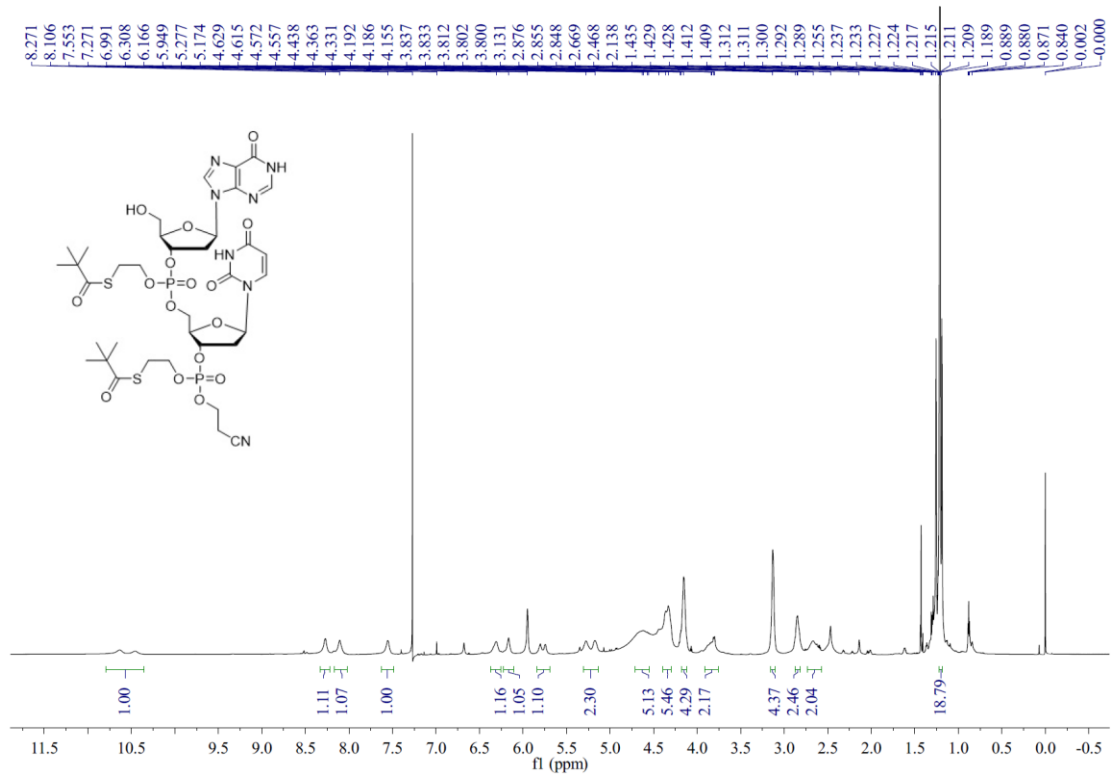

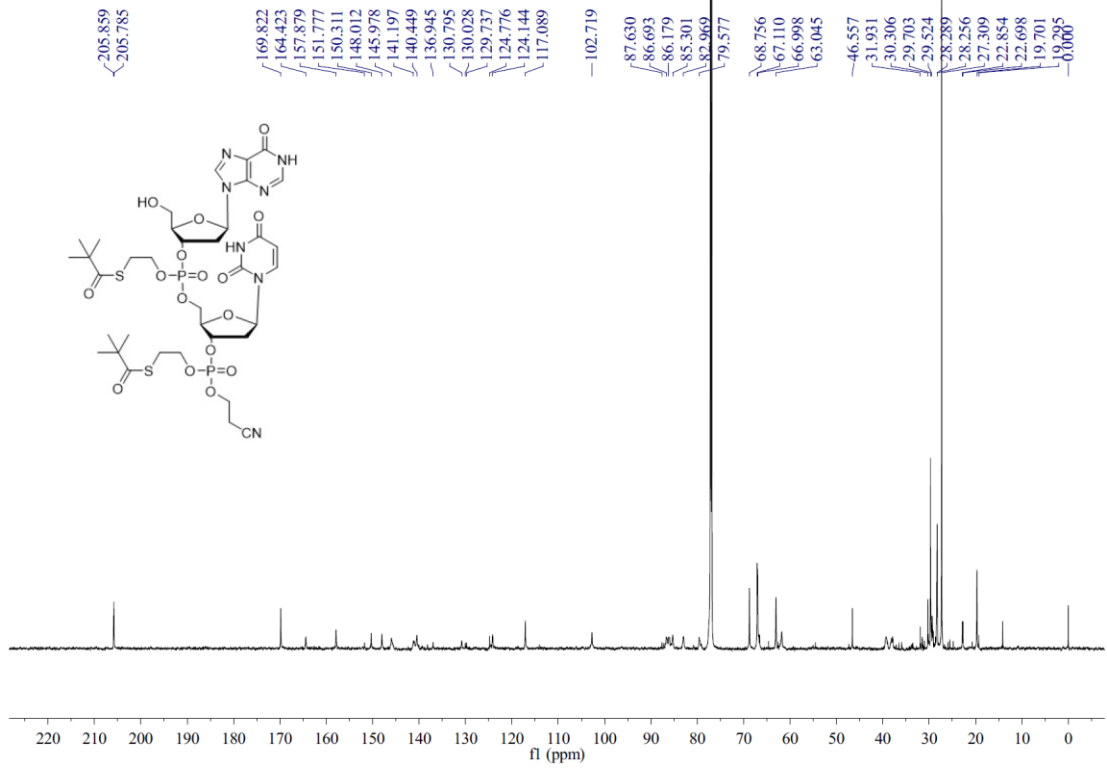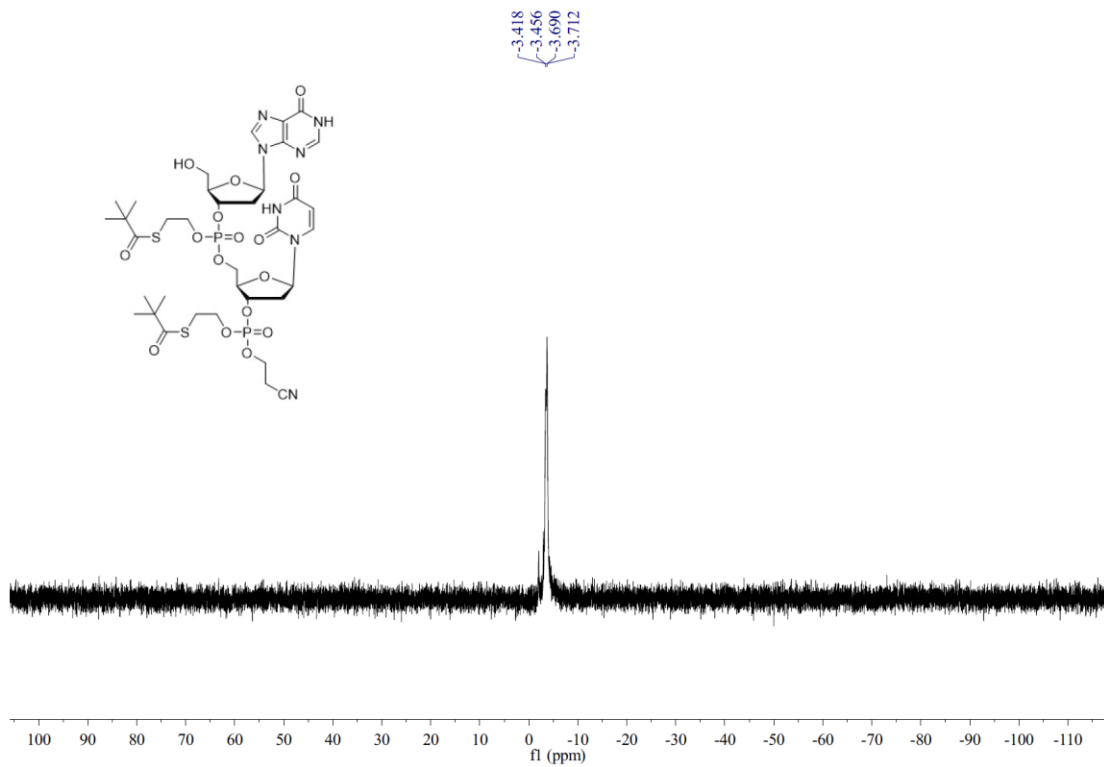

$^1\text{H}$ ,  $^{13}\text{C}$ ,  $^{31}\text{P}$  NMR of **12f**:

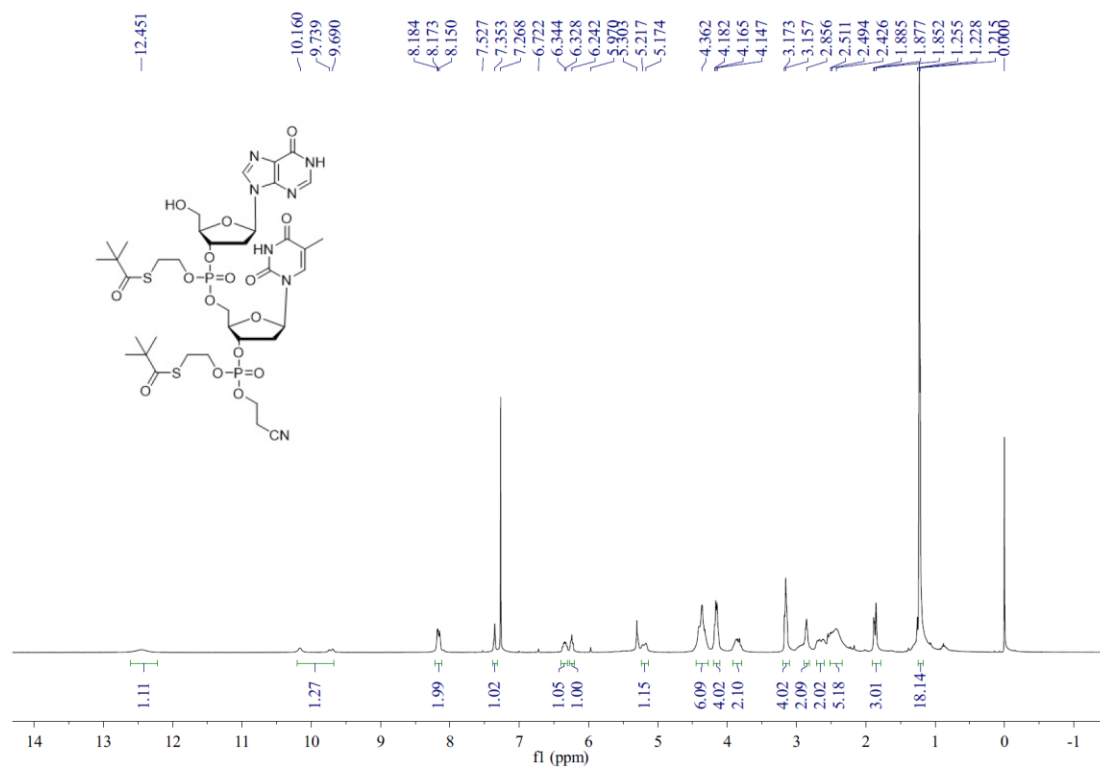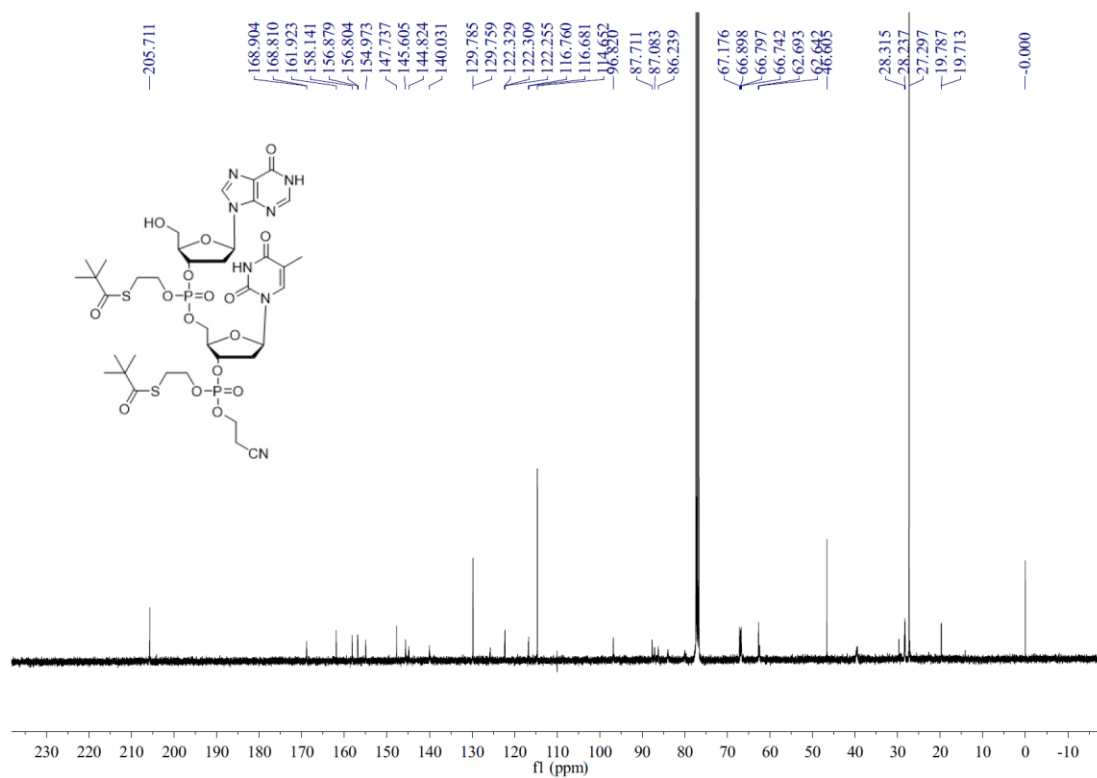

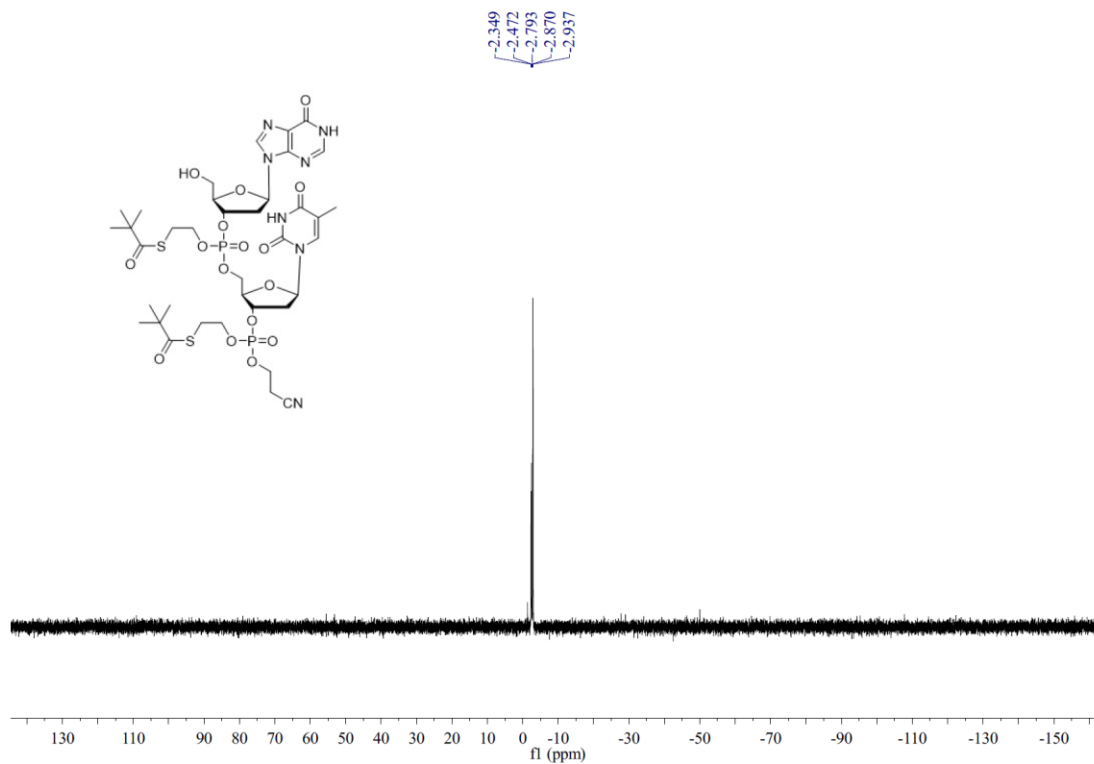

$^1\text{H}$ ,  $^{13}\text{C}$ ,  $^{31}\text{P}$  NMR of 13a:

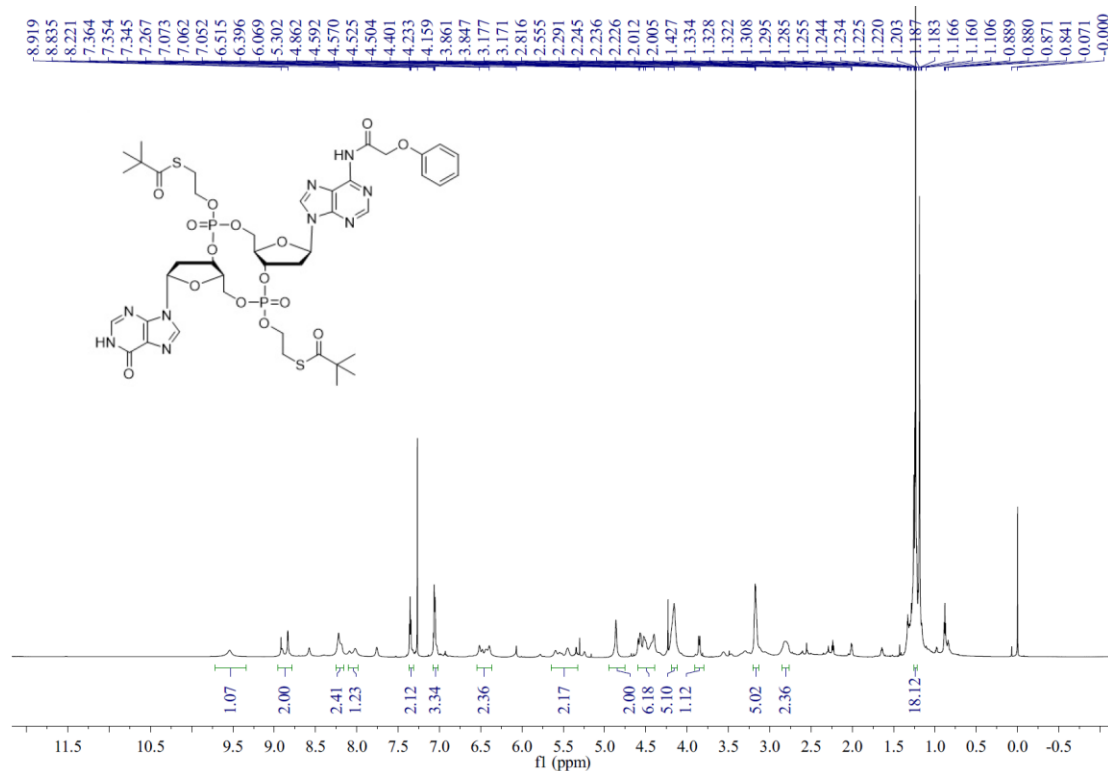

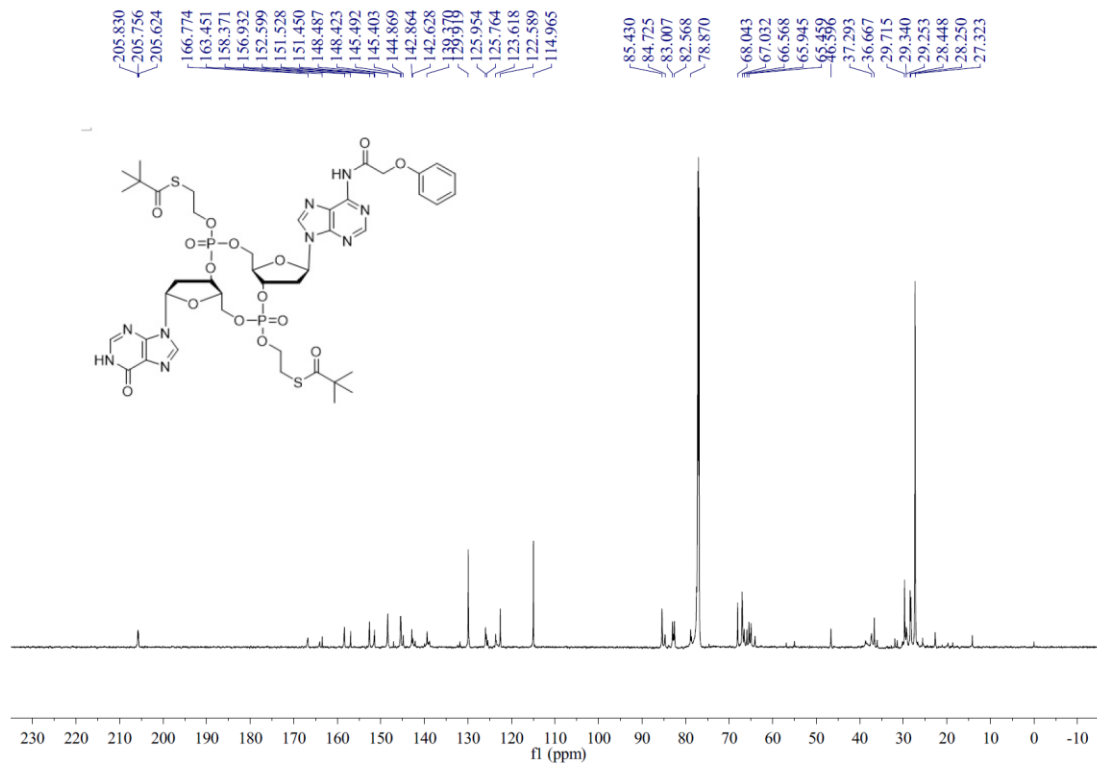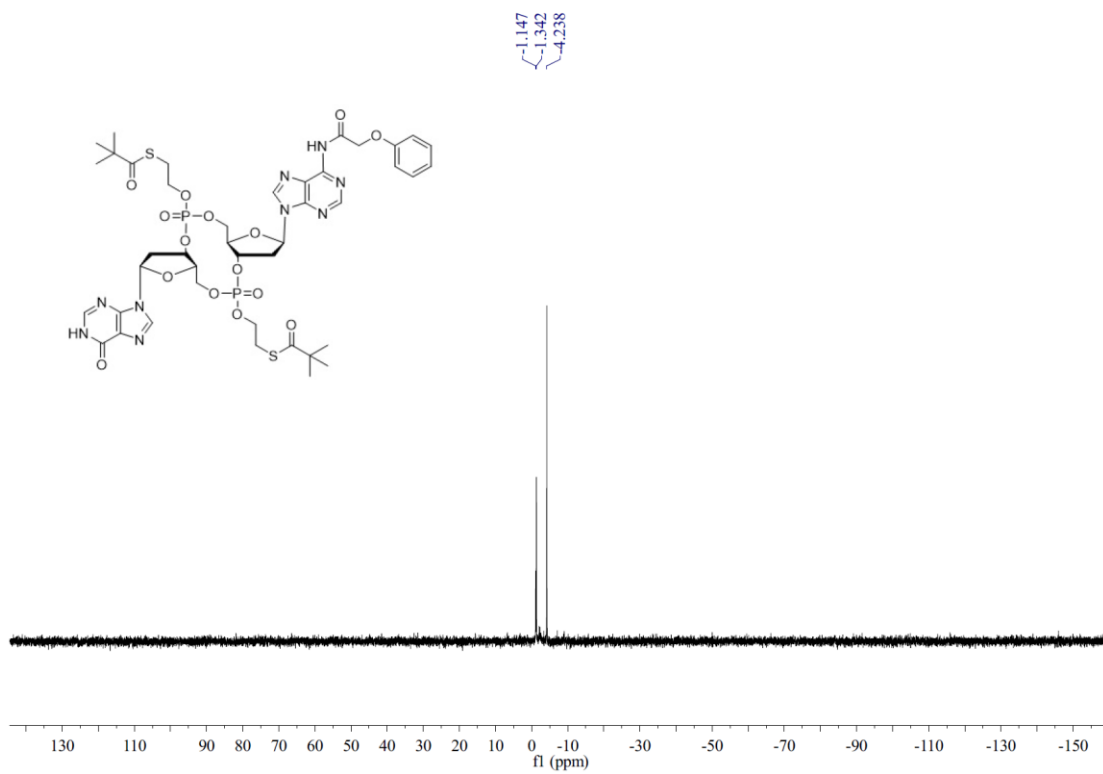

$^1\text{H}$ ,  $^{13}\text{C}$ ,  $^{31}\text{P}$  NMR of **13b**:

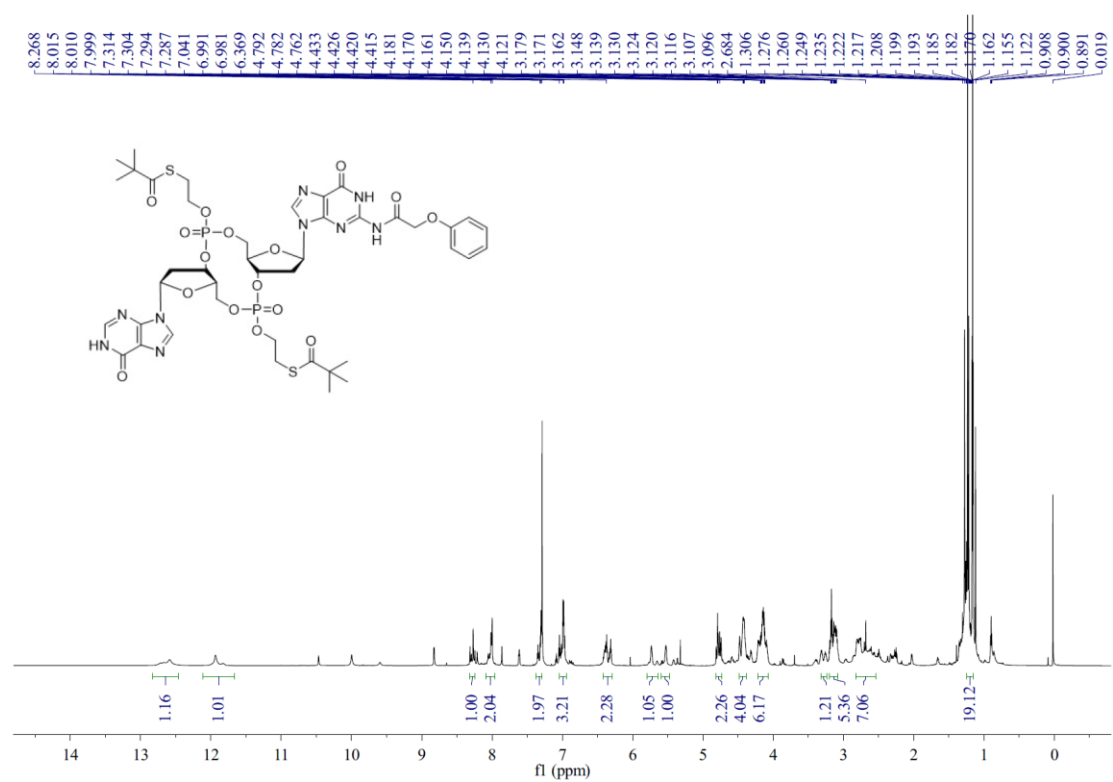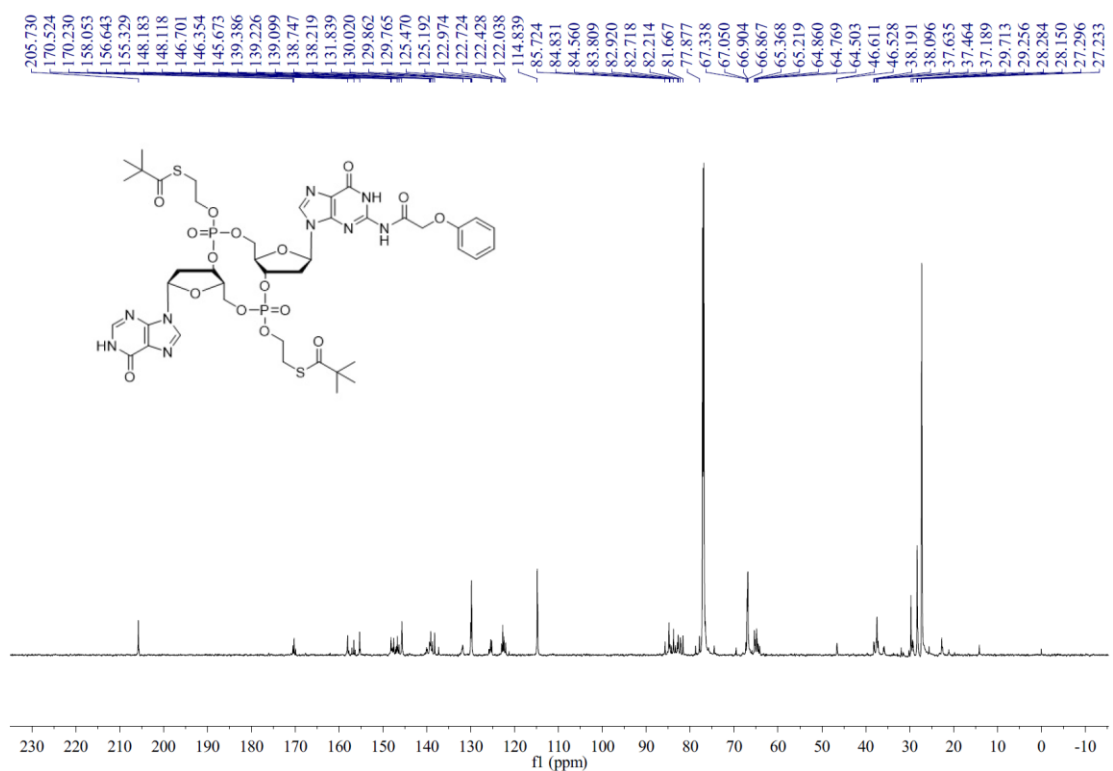

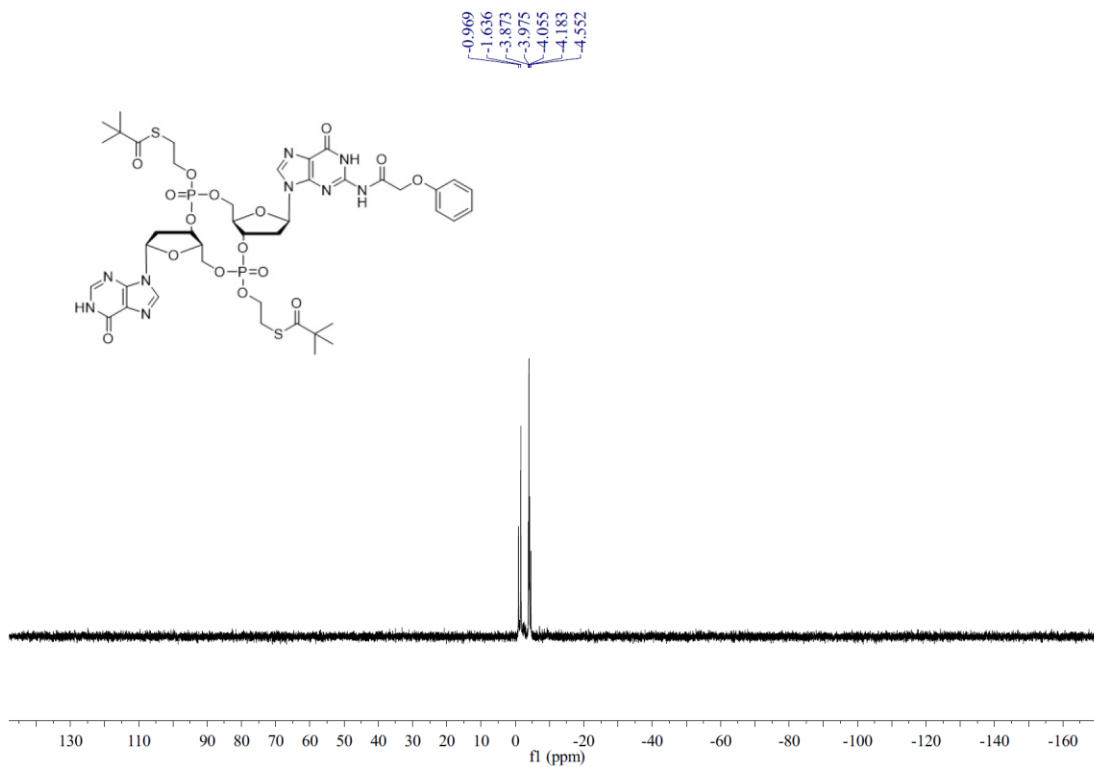

$^1\text{H}$ ,  $^{13}\text{C}$ ,  $^{31}\text{P}$  NMR of **13c**:

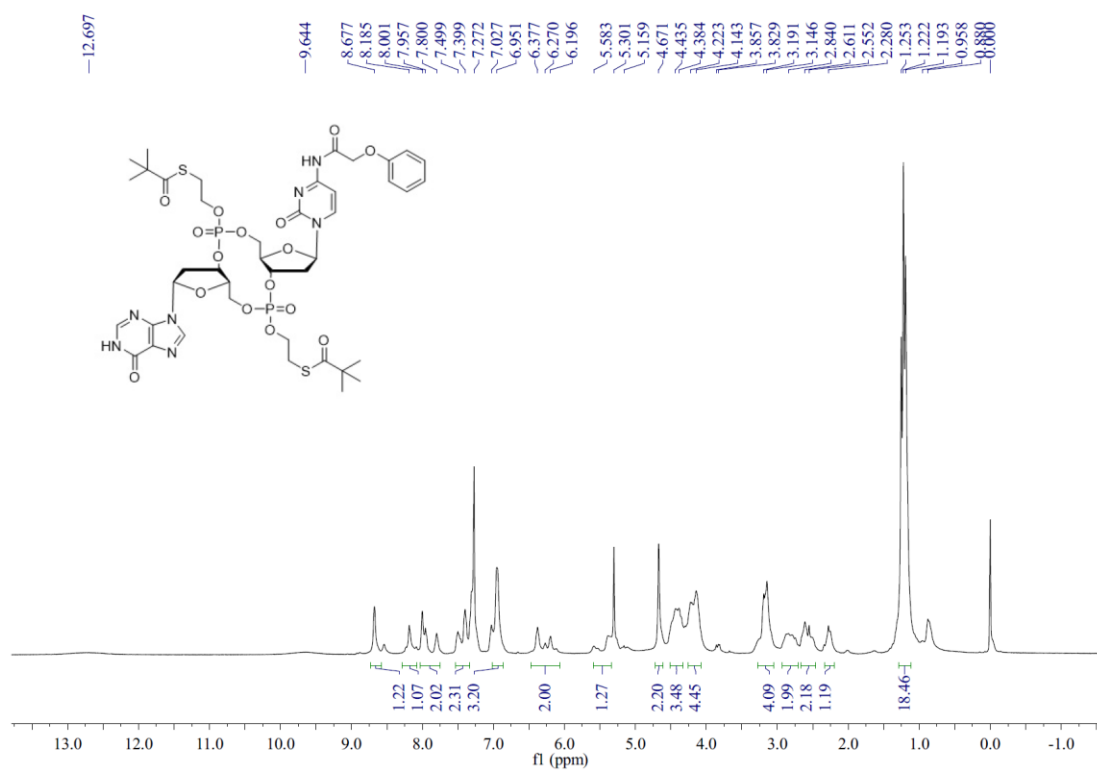

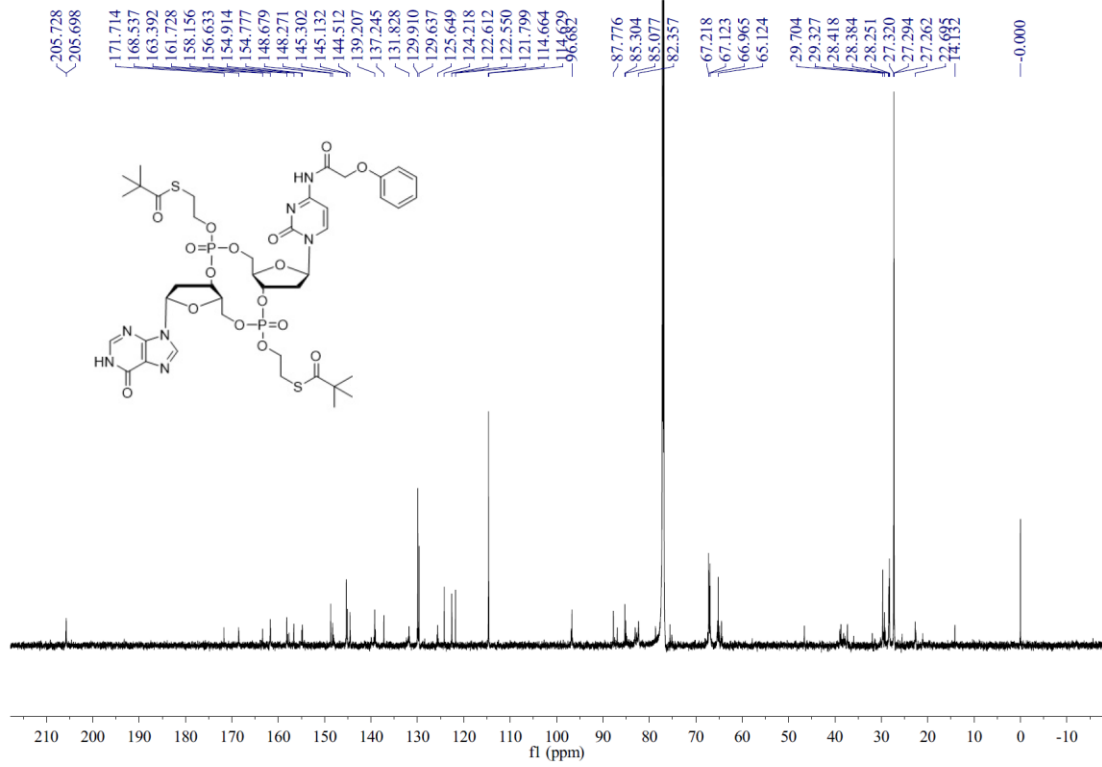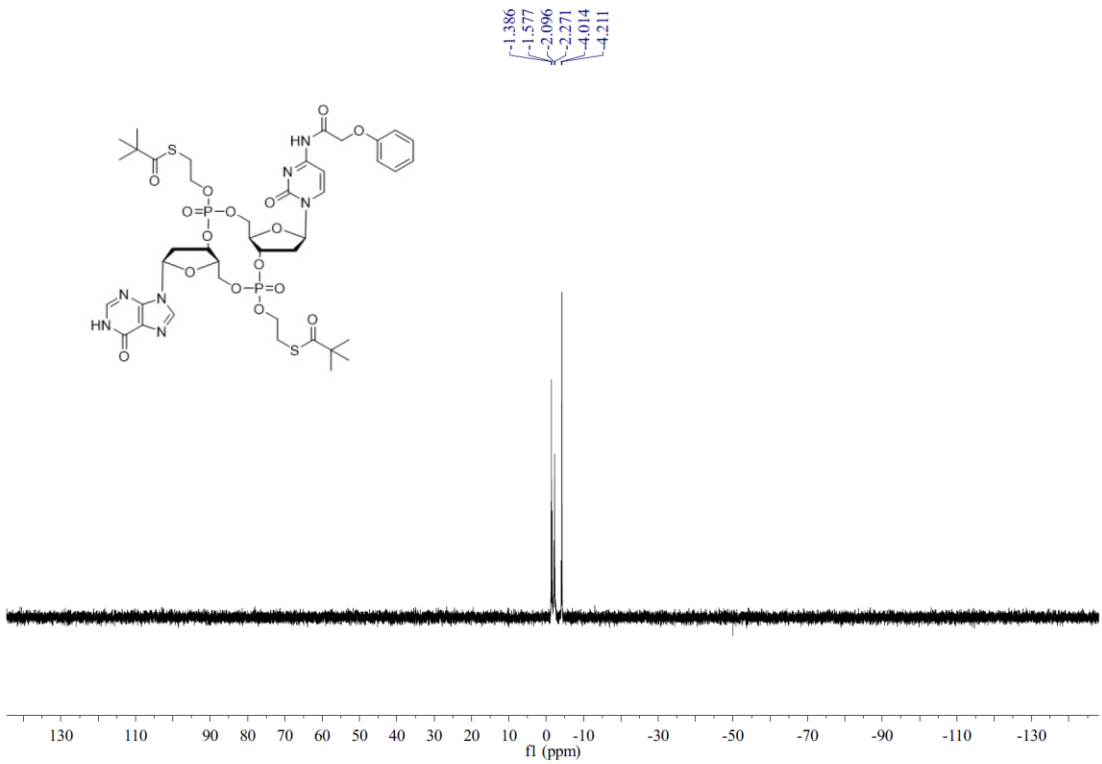



$^1\text{H}$ ,  $^{13}\text{C}$ ,  $^{31}\text{P}$  NMR of **13d**:

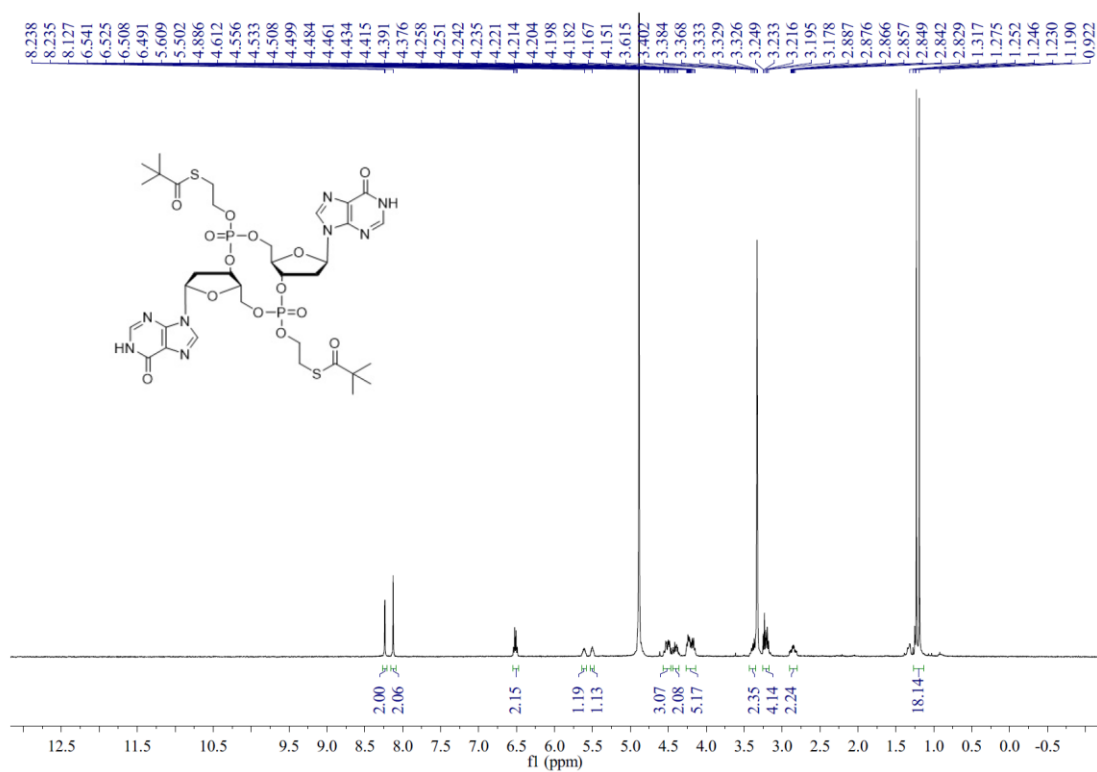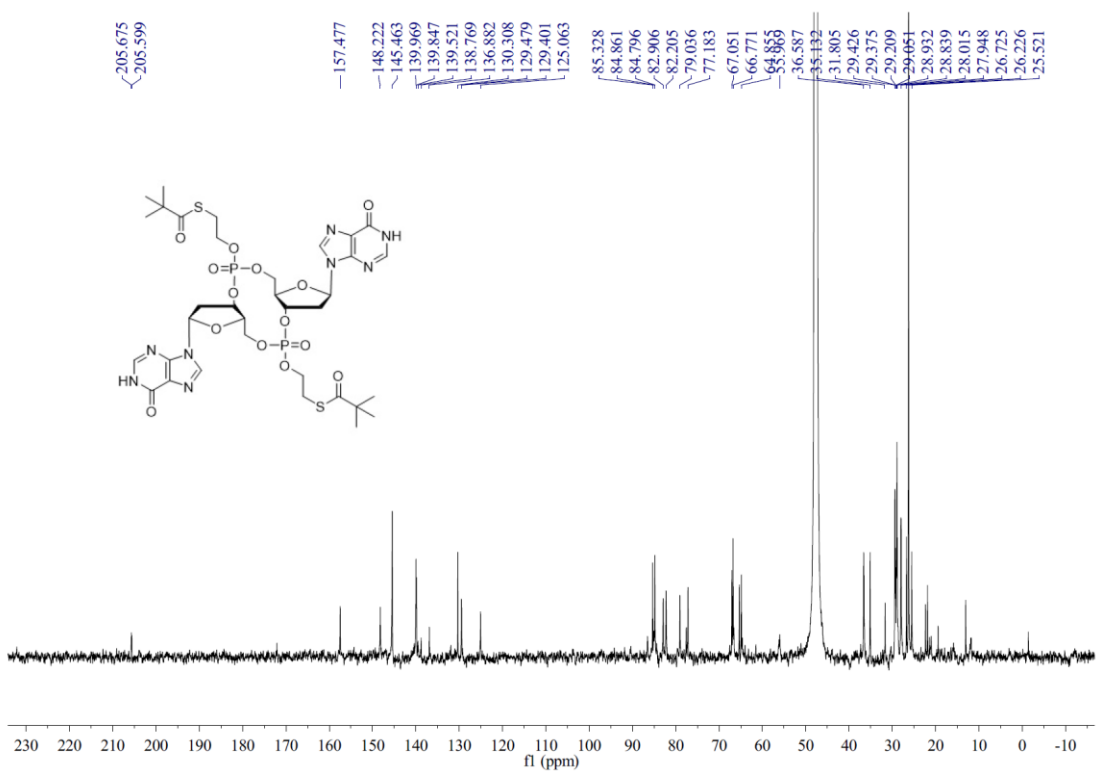

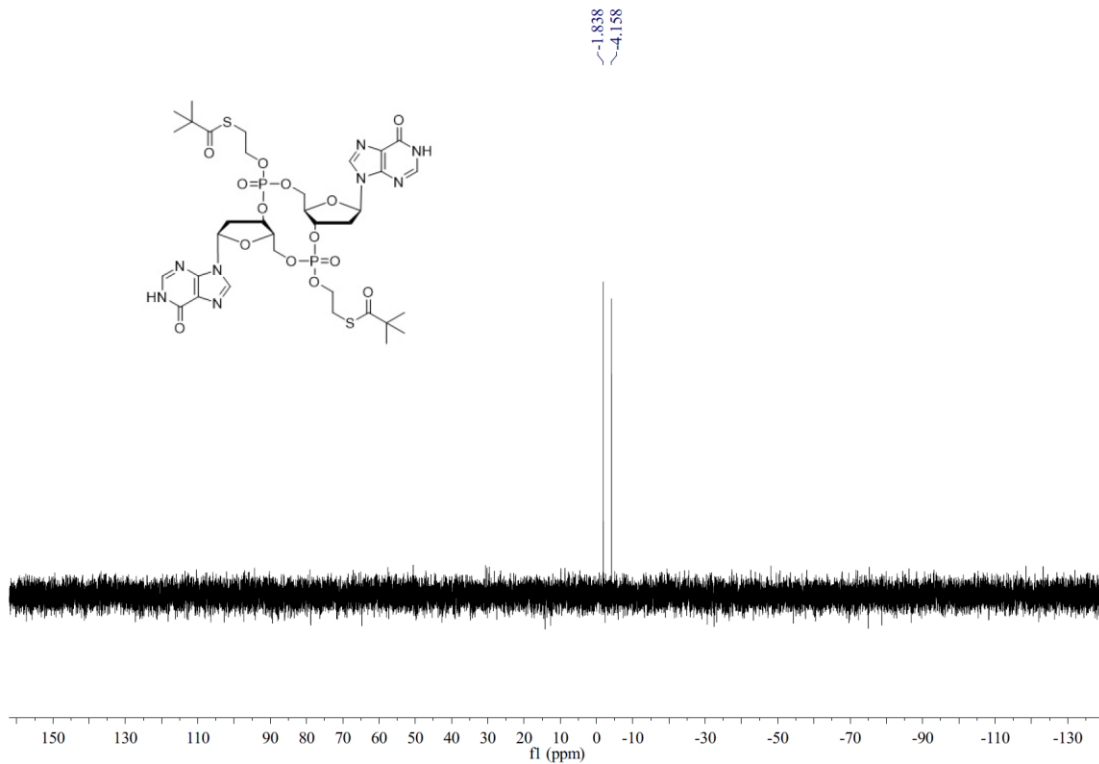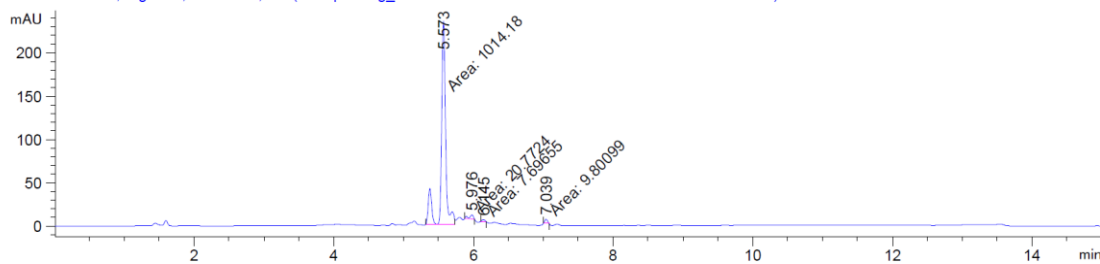

Wavelength = 254 nm

| Peak # | RetTime [min] | Type | Width [min] | Area [mAU*s] | Height [mAU] | Area %  |
|--------|---------------|------|-------------|--------------|--------------|---------|
| 1      | 5.573         | MM   | 0.0717      | 1014.18024   | 235.73274    | 96.3637 |
| 2      | 5.976         | MM   | 0.0750      | 20.77244     | 4.61885      | 1.9737  |
| 3      | 6.145         | MM   | 0.0537      | 7.69655      | 2.38733      | 0.7313  |
| 4      | 7.039         | MM   | 0.0414      | 9.80099      | 3.94245      | 0.9313  |

$^1\text{H}$ ,  $^{13}\text{C}$ ,  $^{31}\text{P}$  NMR of **13e**:

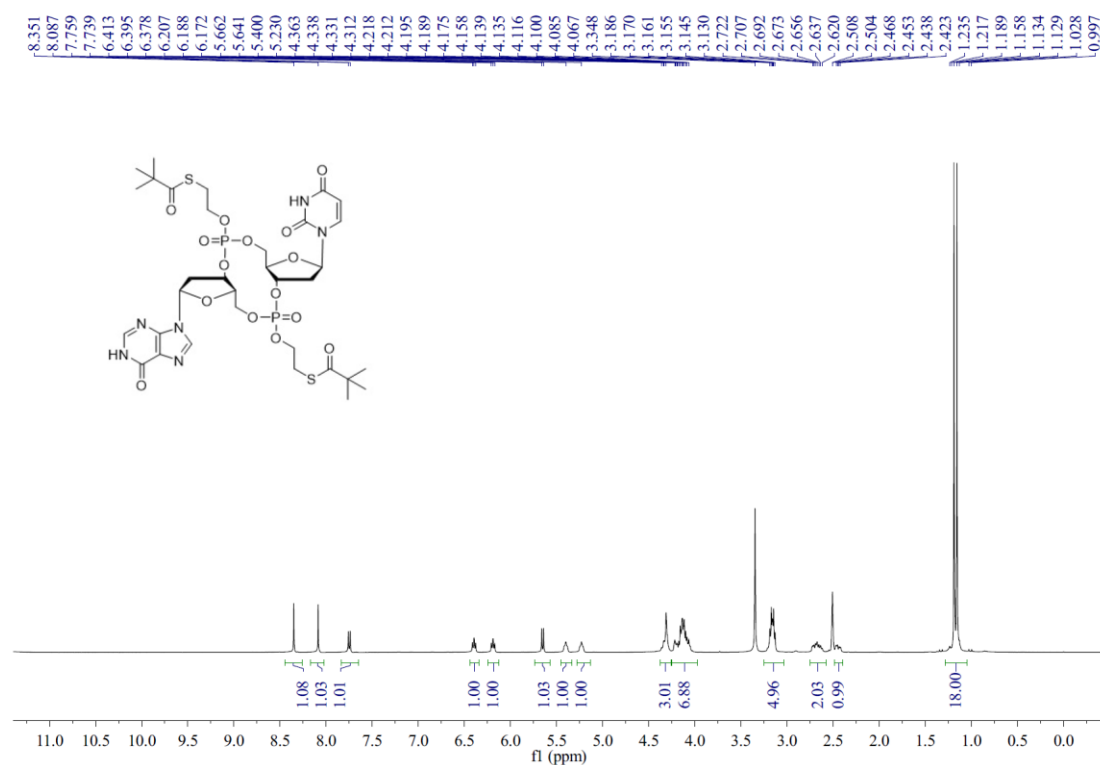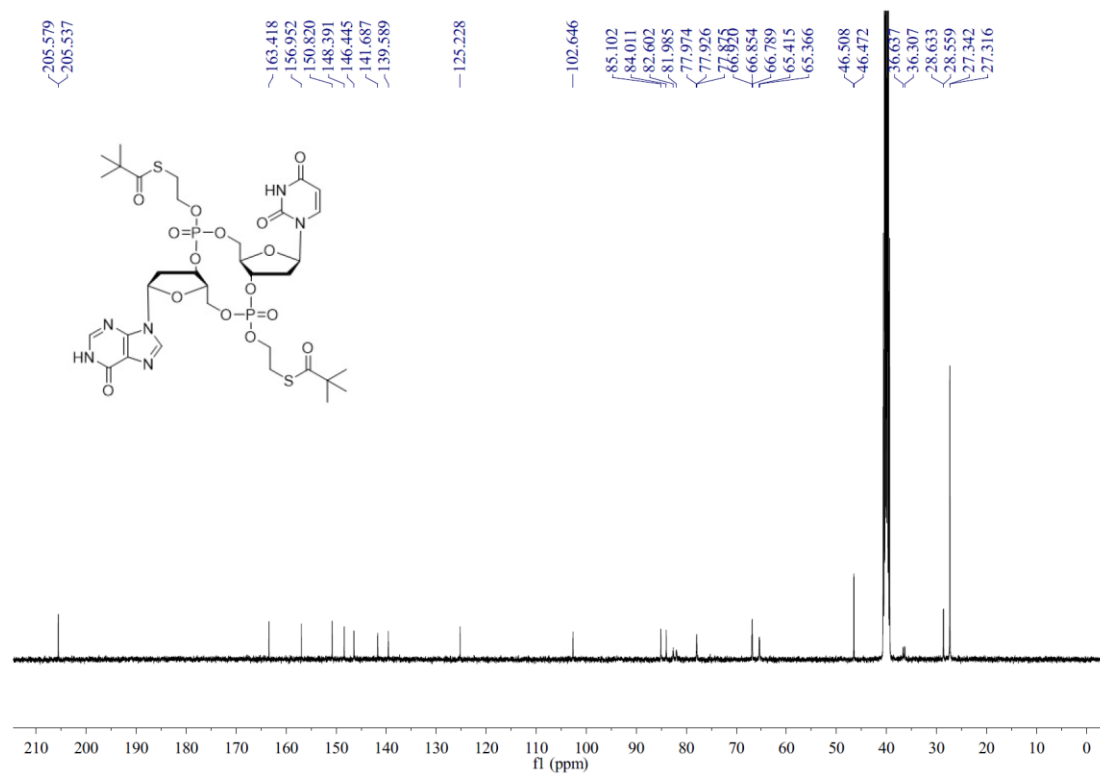

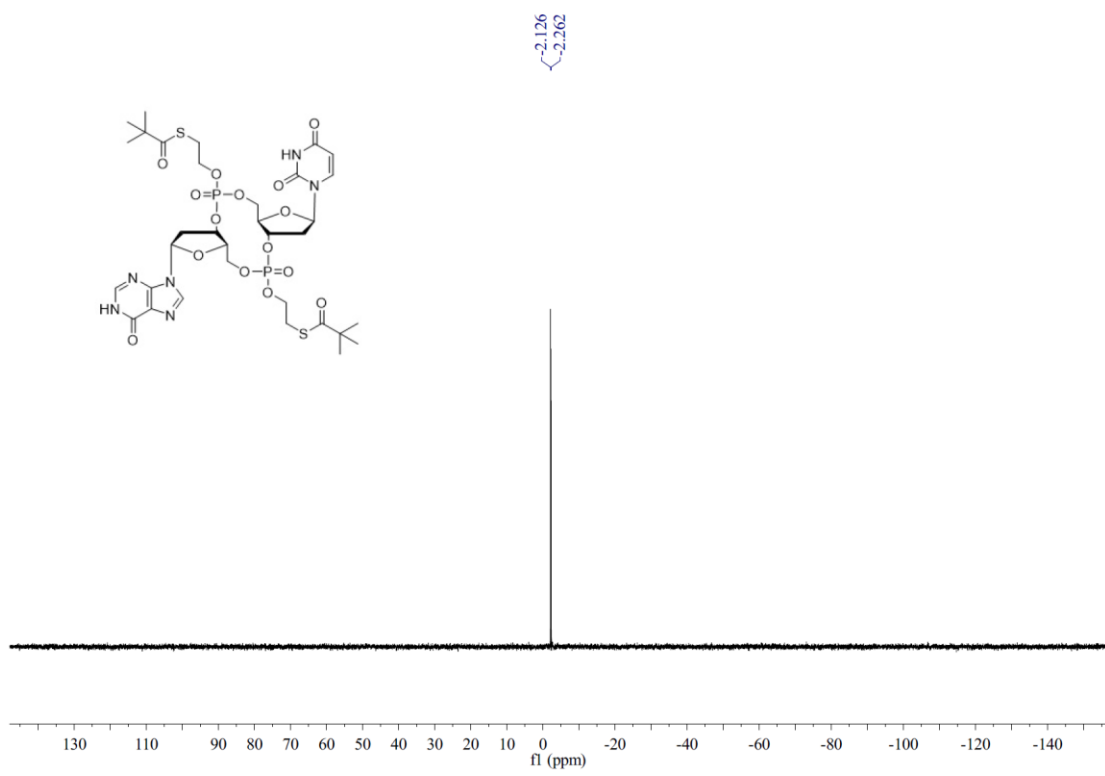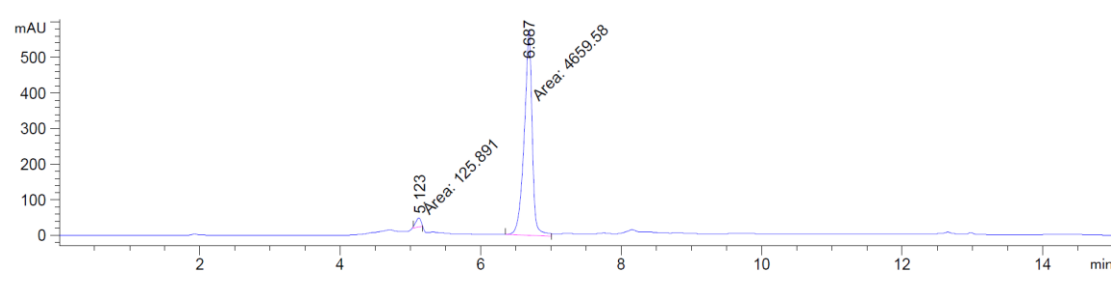

Wavelength = 254 nm

| Peak # | RetTime [min] | Type | Width [min] | Area [mAU*s] | Height [mAU] | Area %  |
|--------|---------------|------|-------------|--------------|--------------|---------|
| 1      | 5.123         | MM   | 0.0835      | 125.89102    | 25.13762     | 2.6307  |
| 2      | 6.687         | MM   | 0.1344      | 4659.58008   | 577.70349    | 97.3693 |

$^1\text{H}$ ,  $^{13}\text{C}$ ,  $^{31}\text{P}$  NMR of **13f**:

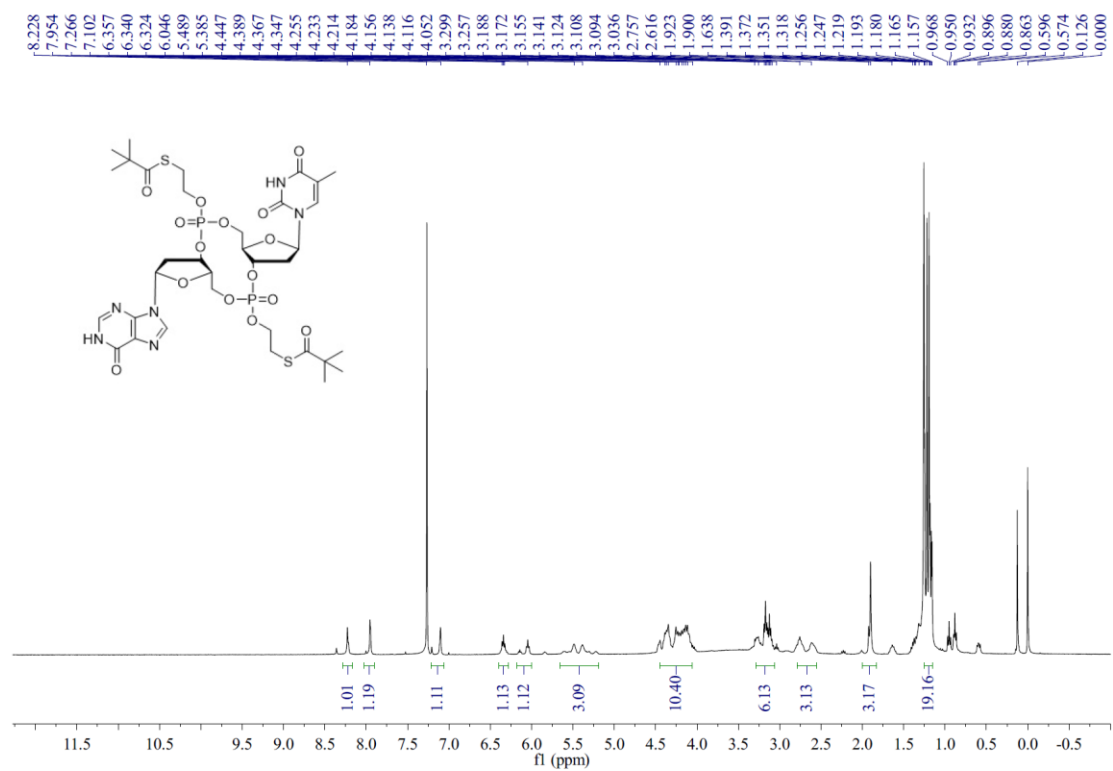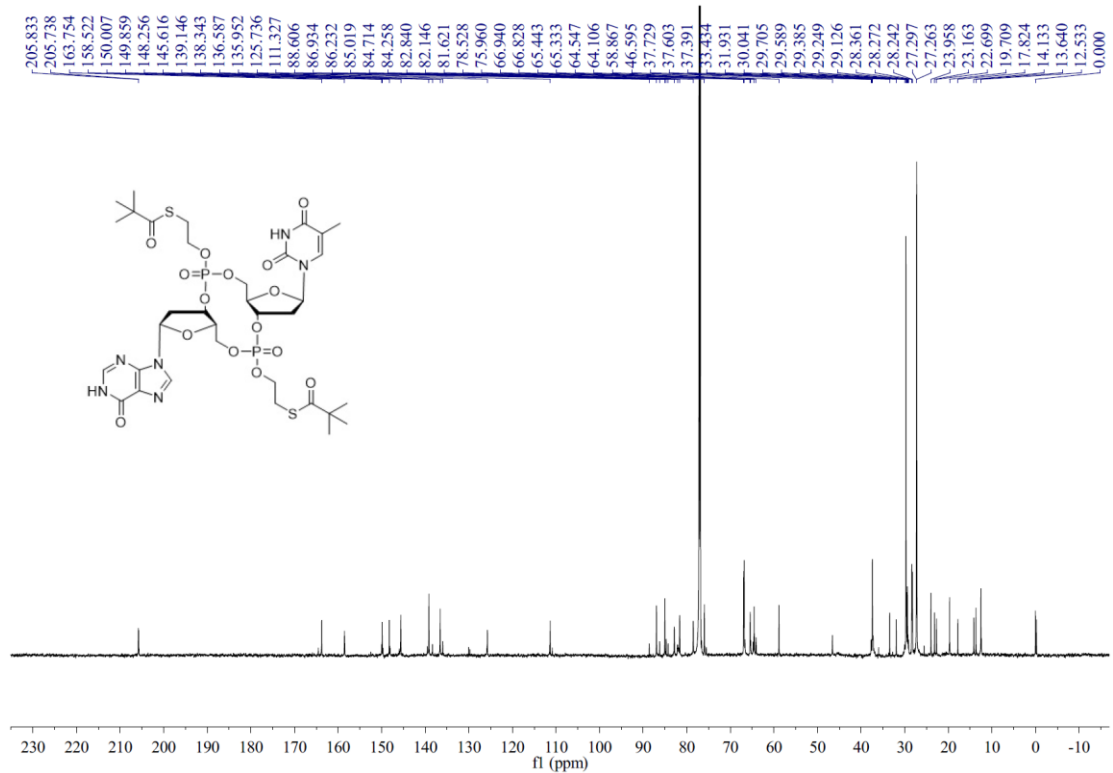

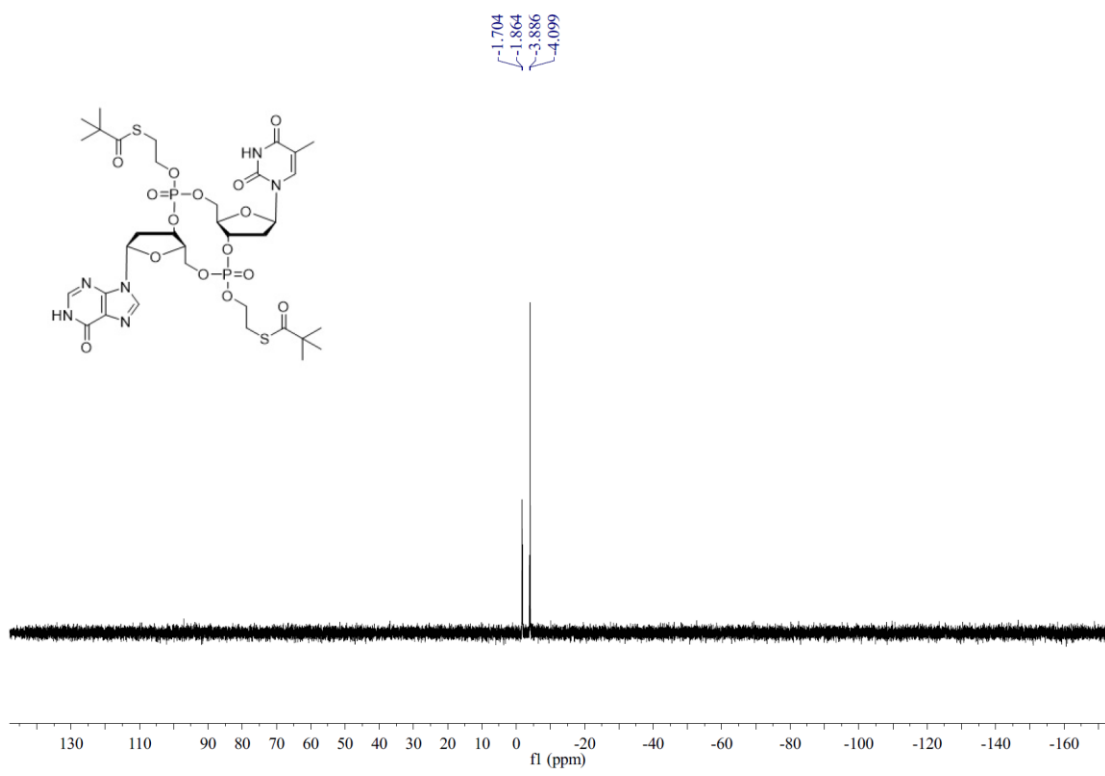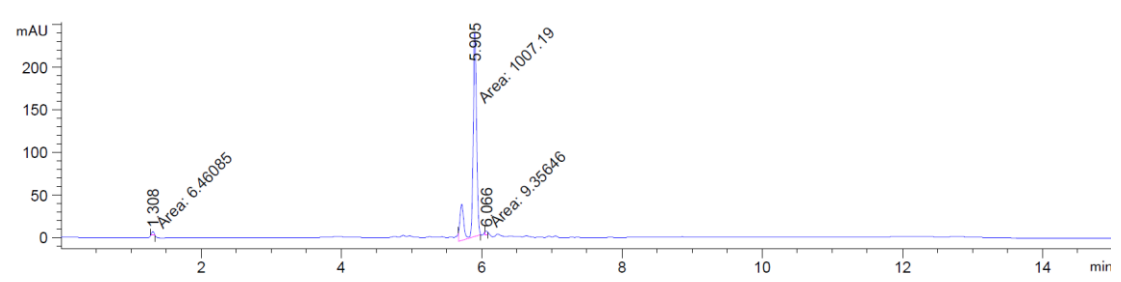

Wavelength = 254 nm

| Peak # | RetTime [min] | Type | Width [min] | Area [mAU*s] | Height [mAU] | Area %  |
|--------|---------------|------|-------------|--------------|--------------|---------|
| 1      | 1.308         | MM   | 0.0330      | 6.46085      | 3.25869      | 0.6316  |
| 2      | 5.905         | MM   | 0.0695      | 1007.19232   | 241.39569    | 98.4538 |
| 3      | 6.066         | MM   | 0.0353      | 9.35646      | 4.42184      | 0.9146  |

$^1\text{H}$ ,  $^{13}\text{C}$ ,  $^{31}\text{P}$  NMR and HPLC spectra of **14a**:

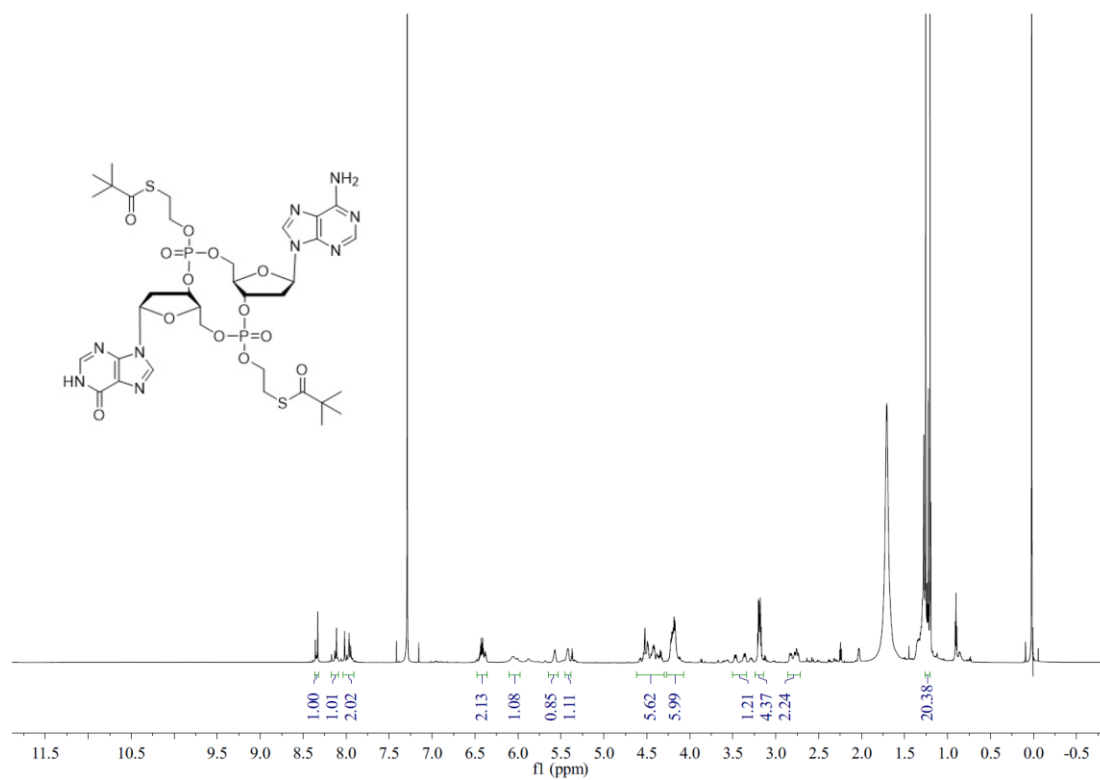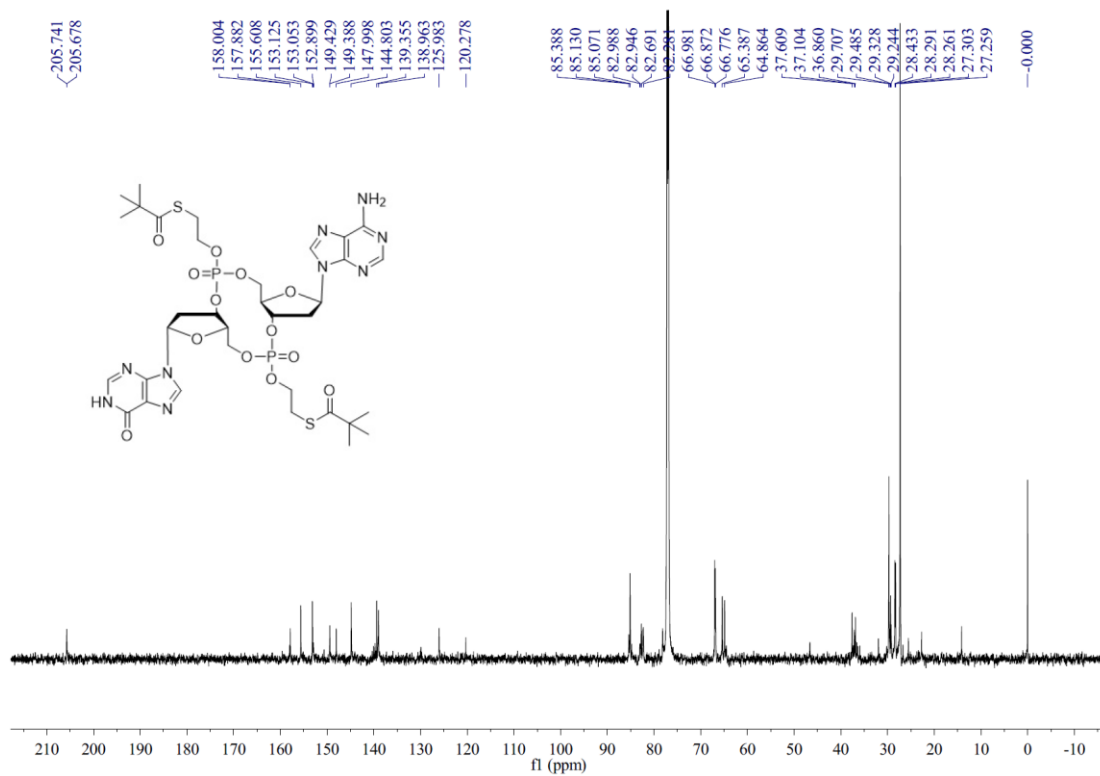

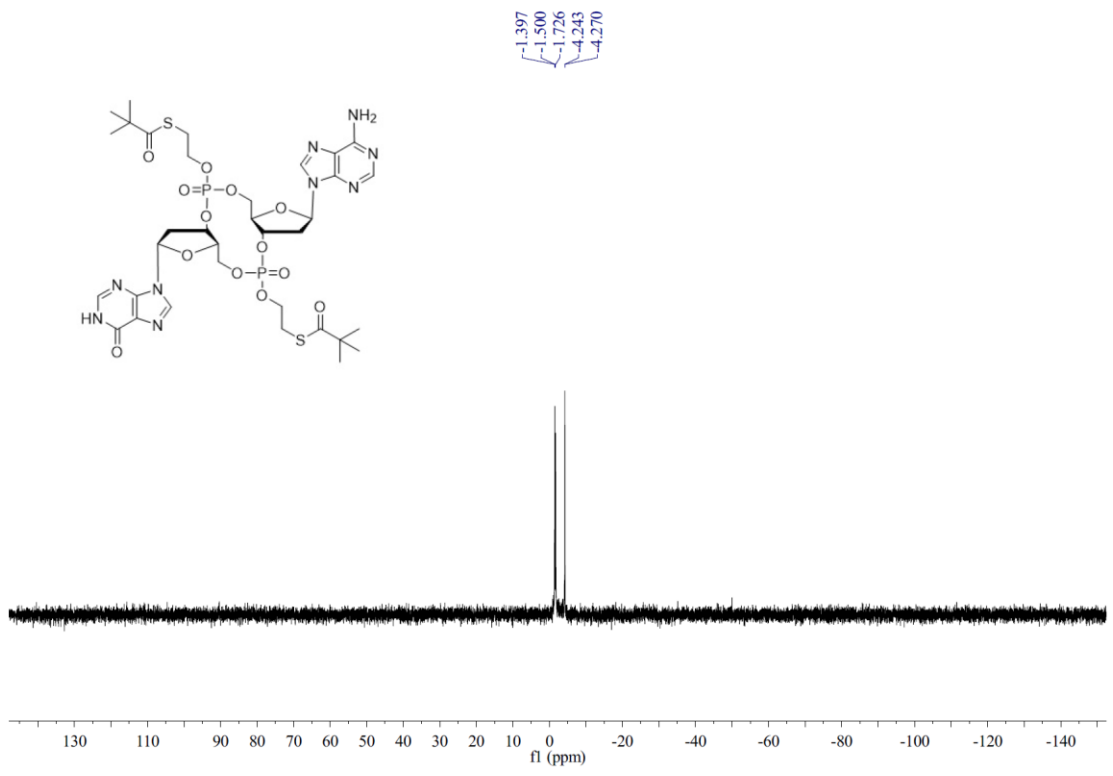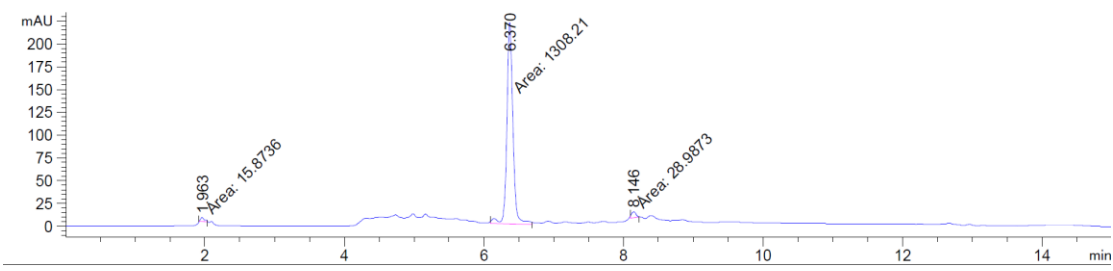

Wavelength = 254 nm

| Peak # | RetTime [min] | Type | Width [min] | Area [mAU*s] | Height [mAU] | Area %  |
|--------|---------------|------|-------------|--------------|--------------|---------|
| 1      | 1.963         | MM   | 0.0630      | 15.87361     | 4.19902      | 1.1732  |
| 2      | 6.370         | MM   | 0.0983      | 1308.21338   | 221.85370    | 96.6845 |
| 3      | 8.146         | MM   | 0.0730      | 28.98730     | 6.61780      | 2.1423  |



$^1\text{H}$ ,  $^{13}\text{C}$ ,  $^{31}\text{P}$  NMR and HPLC spectra of **14b**:

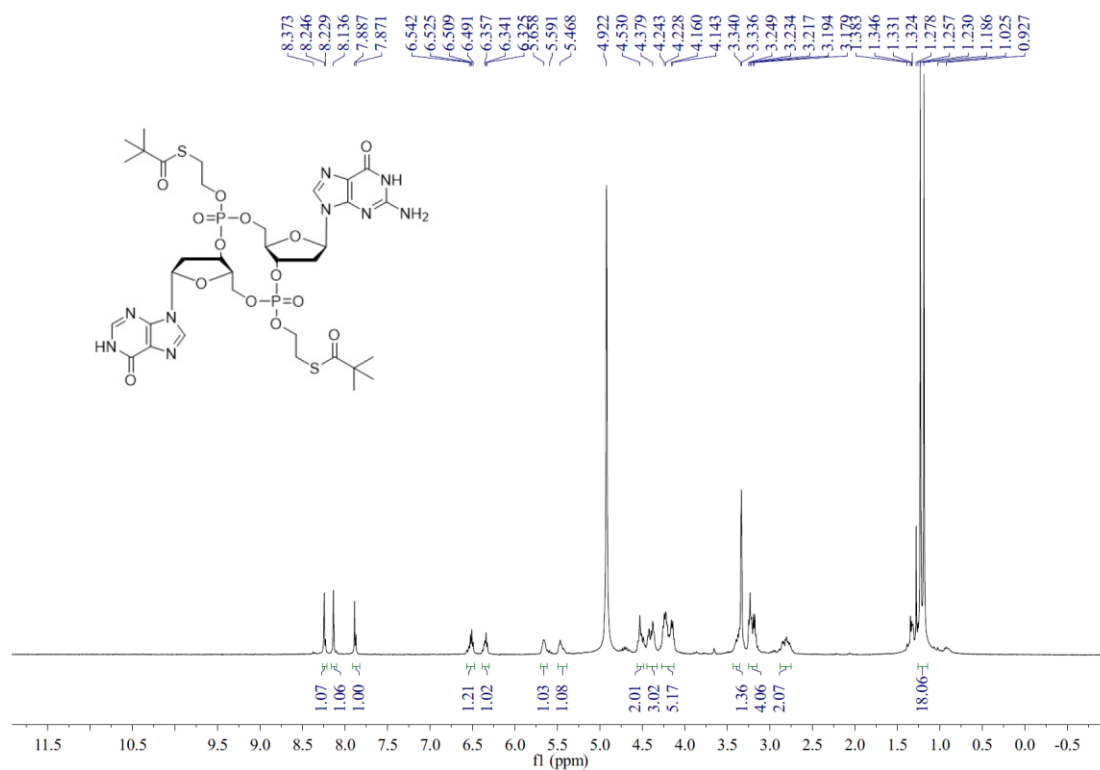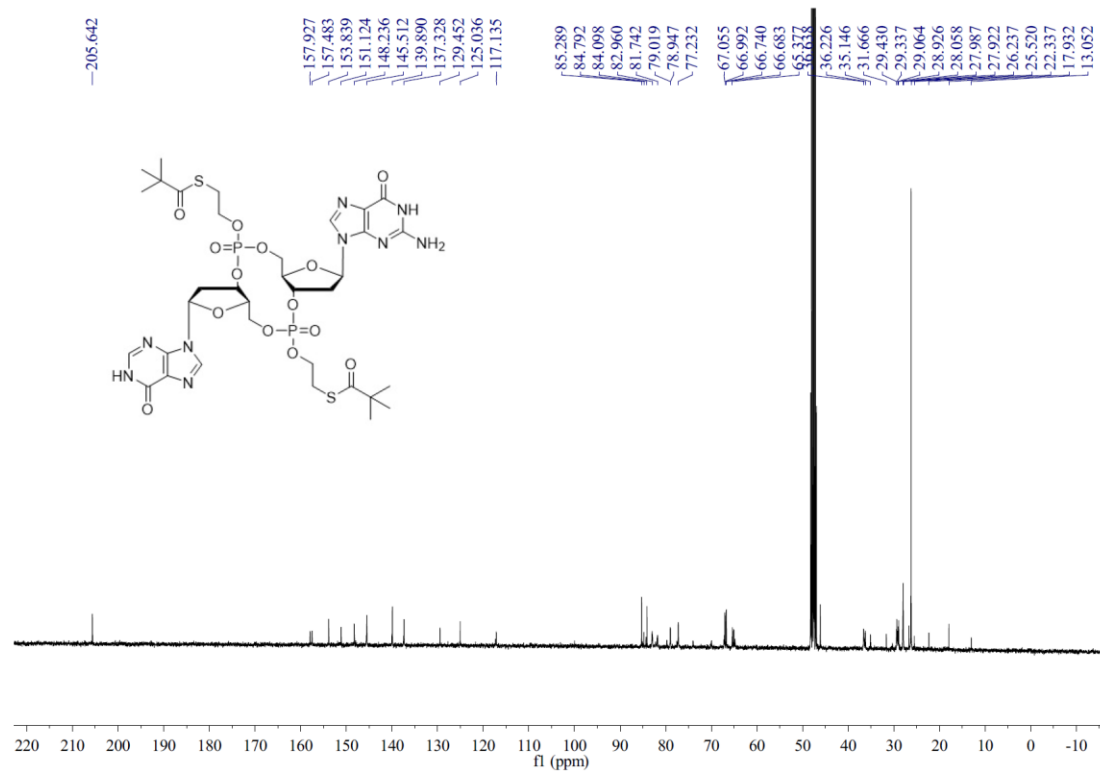

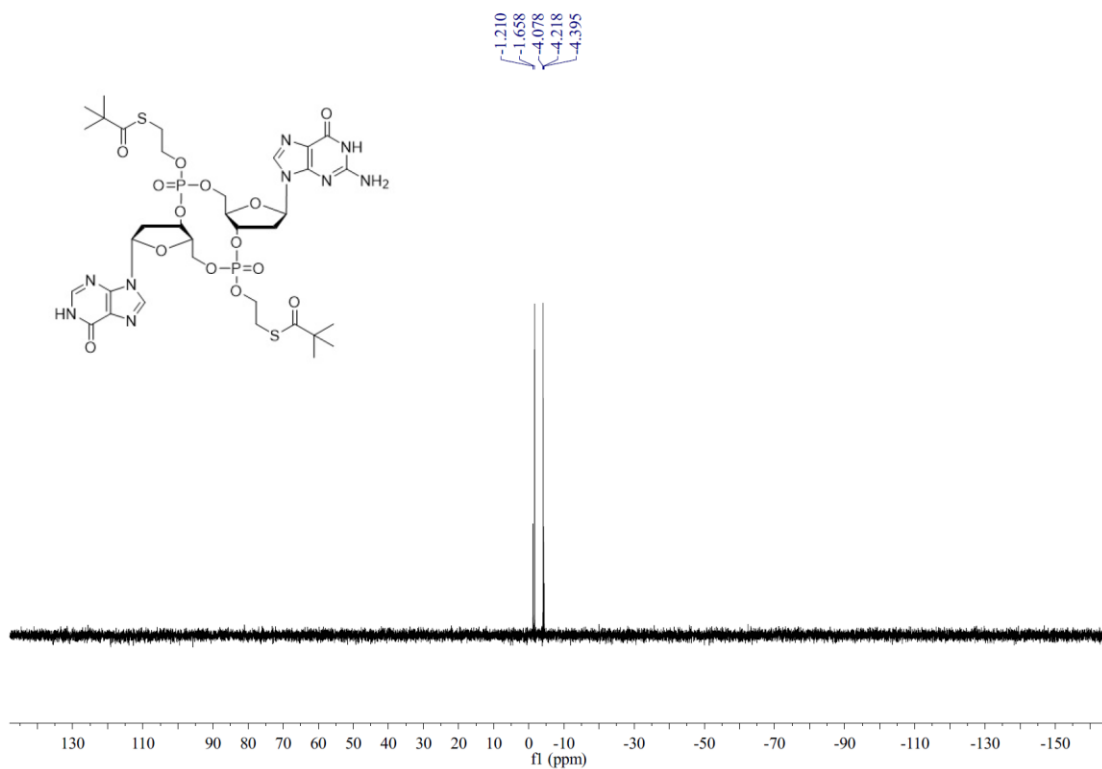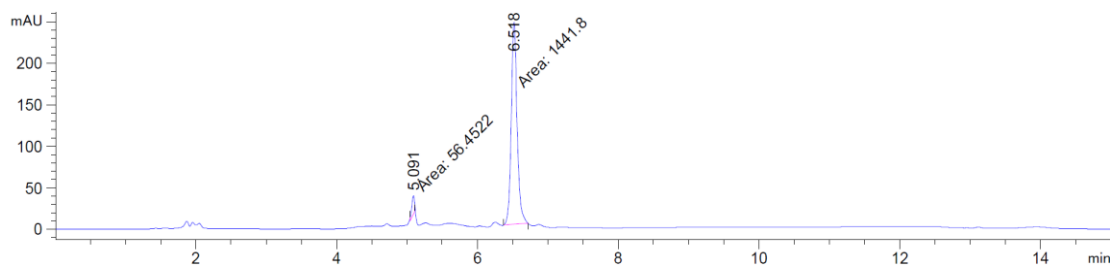

Wavelength = 254 nm

| Peak # | RetTime [min] | Type | Width [min] | Area [mAU*s] | Height [mAU] | Area %  |
|--------|---------------|------|-------------|--------------|--------------|---------|
| 1      | 5.091         | MM   | 0.0398      | 56.45222     | 23.61695     | 3.7679  |
| 2      | 6.518         | MM   | 0.0985      | 1441.80322   | 244.03915    | 96.2321 |

$^1\text{H}$ ,  $^{13}\text{C}$ ,  $^{31}\text{P}$  NMR and HPLC spectra of **14c**:

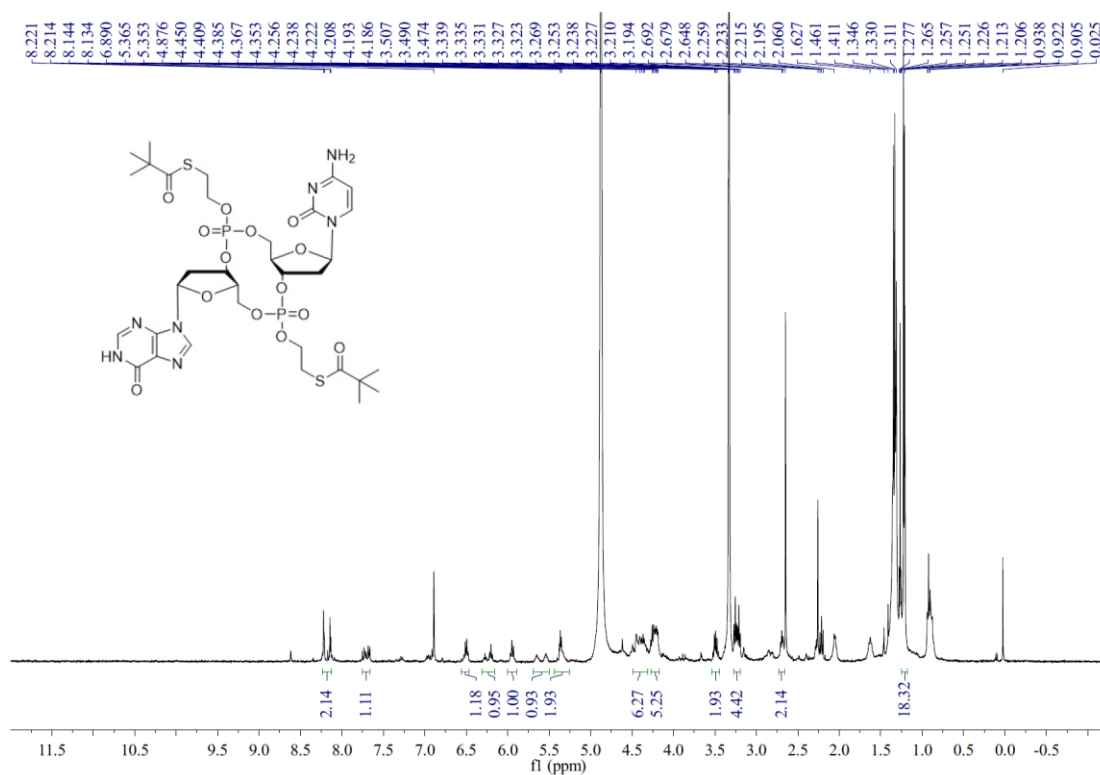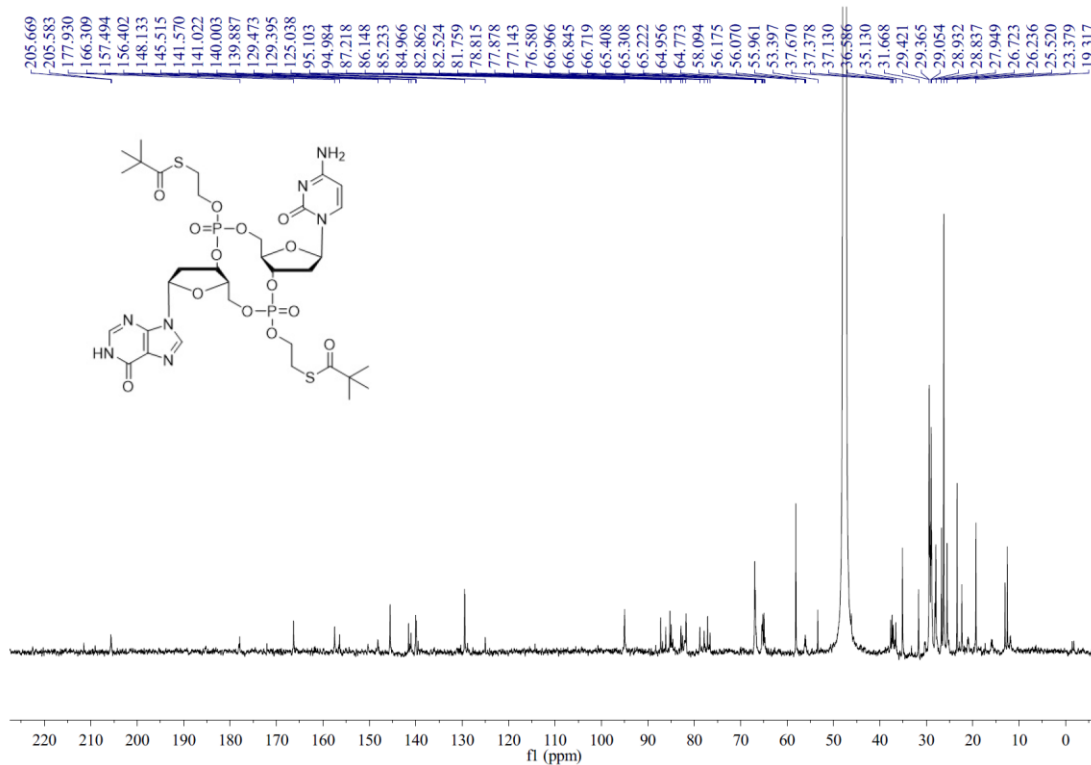

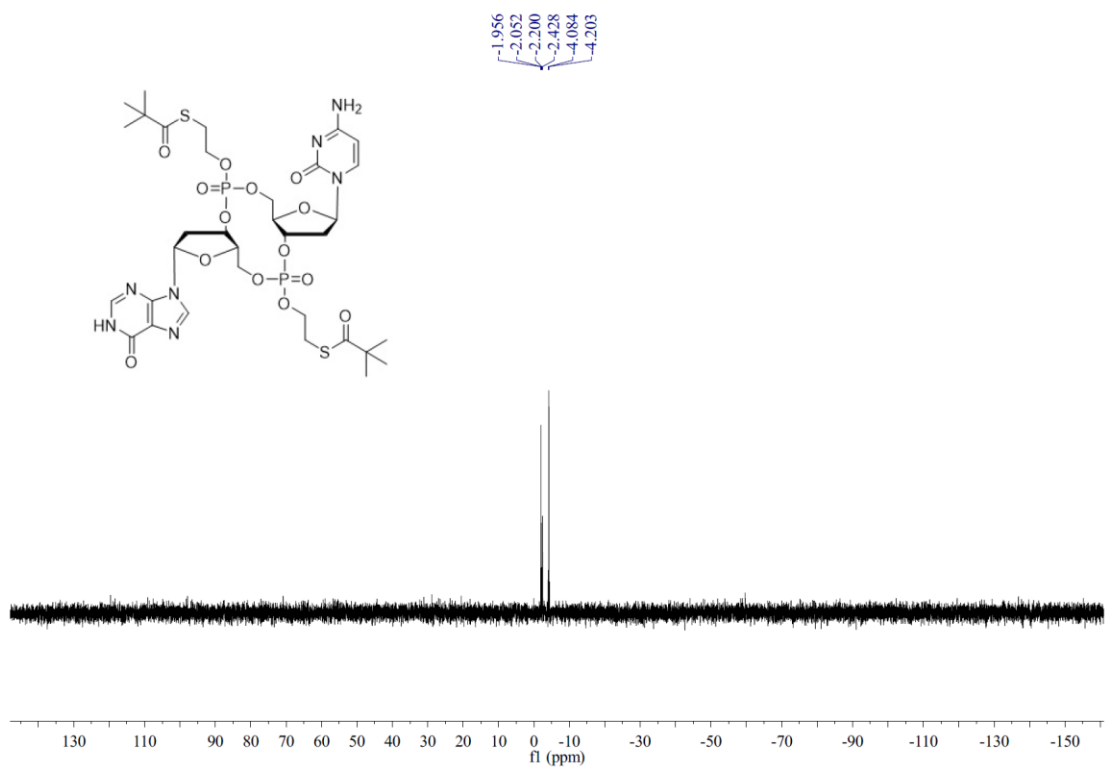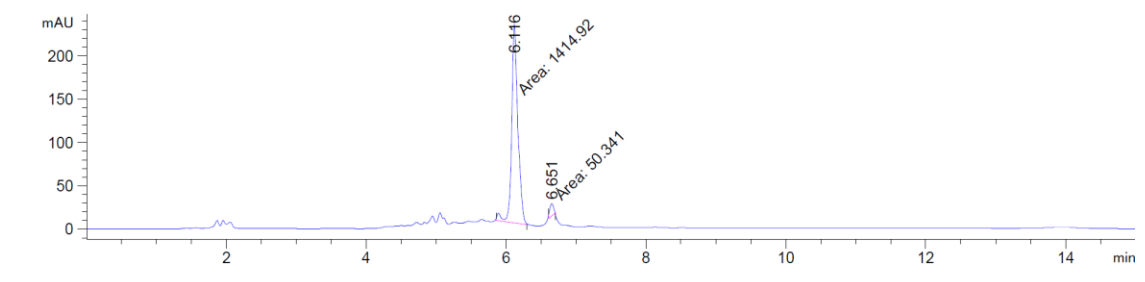

Wavelength = 254 nm

| Peak # | RetTime [min] | Type | Width [min] | Area [mAU*s] | Height [mAU] | Area %  |
|--------|---------------|------|-------------|--------------|--------------|---------|
| 1      | 6.116         | MM   | 0.1029      | 1414.92310   | 229.15054    | 96.5644 |
| 2      | 6.651         | MM   | 0.0590      | 50.34100     | 14.21182     | 3.4356  |

### HPLC spectra of 2',3'-cGAMP:

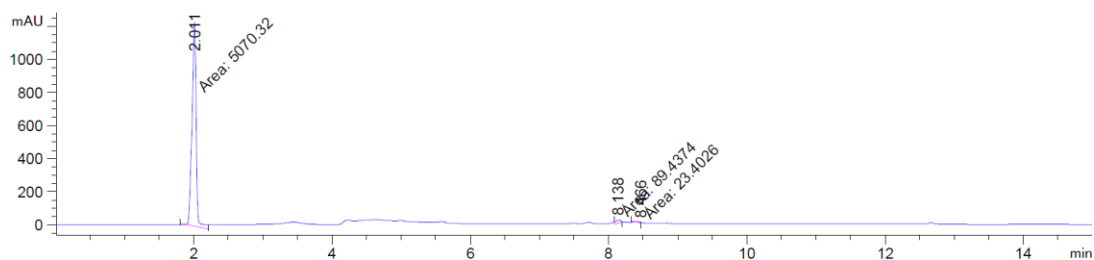

Wavelength = 254 nm

| Peak # | RetTime [min] | Type | Width [min] | Area [mAU*s] | Height [mAU] | Area %  |
|--------|---------------|------|-------------|--------------|--------------|---------|
| 1      | 2.011         | MM   | 0.0682      | 5070.32373   | 1238.31140   | 97.8230 |
| 2      | 8.138         | MM T | 0.0821      | 89.43742     | 18.16607     | 1.7255  |
| 3      | 8.466         | MM   | 0.0636      | 23.40262     | 6.13035      | 0.4515  |

### HPLC spectra of ADU-S100:

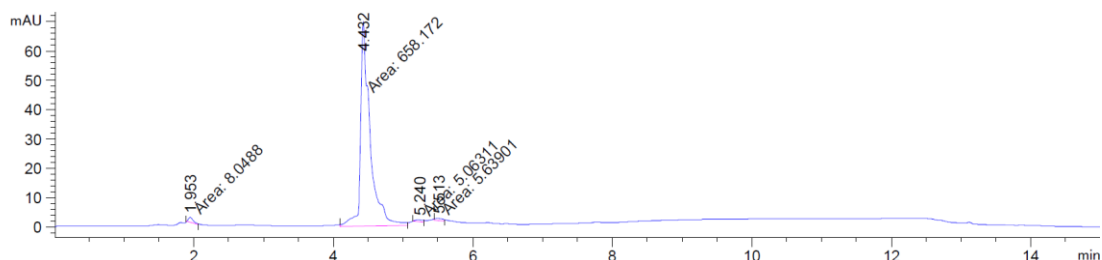

Wavelength = 254 nm

| Peak # | RetTime [min] | Type | Width [min] | Area [mAU*s] | Height [mAU] | Area %  |
|--------|---------------|------|-------------|--------------|--------------|---------|
| 1      | 1.953         | MM   | 0.0804      | 8.04880      | 1.66835      | 1.1890  |
| 2      | 4.432         | MM   | 0.1575      | 658.17188    | 69.62640     | 97.2300 |
| 3      | 5.240         | MM   | 0.1249      | 5.06311      | 6.75574e-1   | 0.7480  |
| 4      | 5.513         | MM   | 0.1258      | 5.63901      | 7.46921e-1   | 0.8330  |

**Raw Images of western blots:**

pSTING

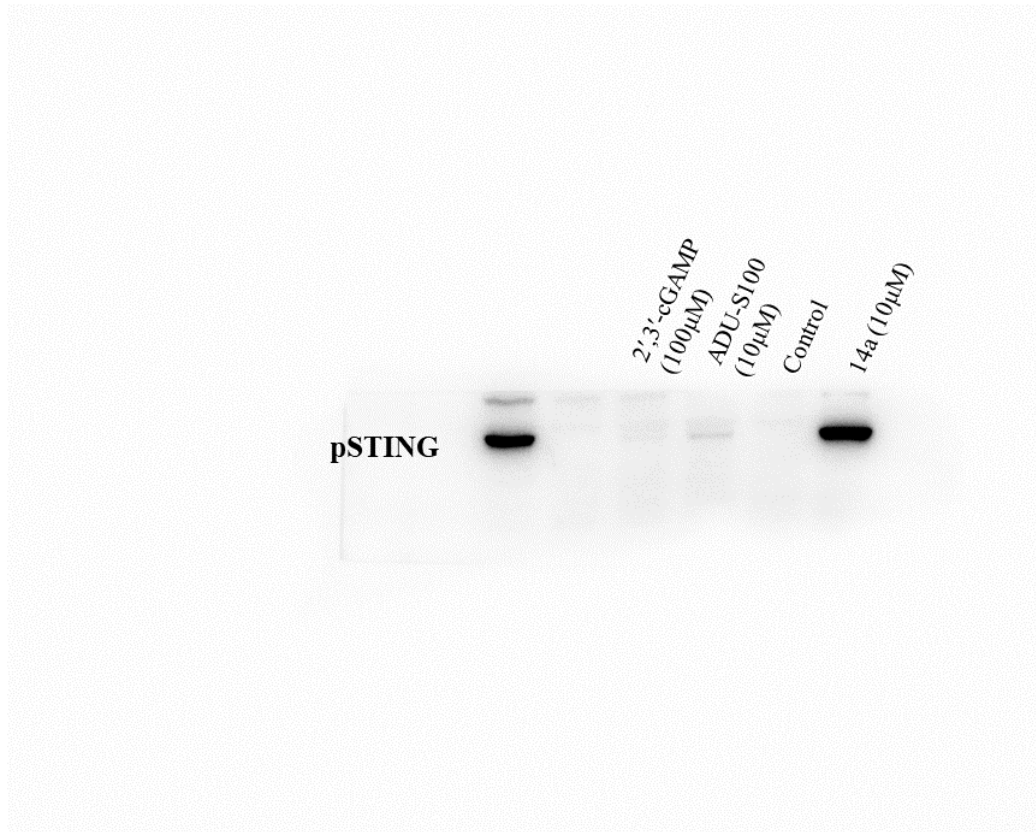

# Total STING

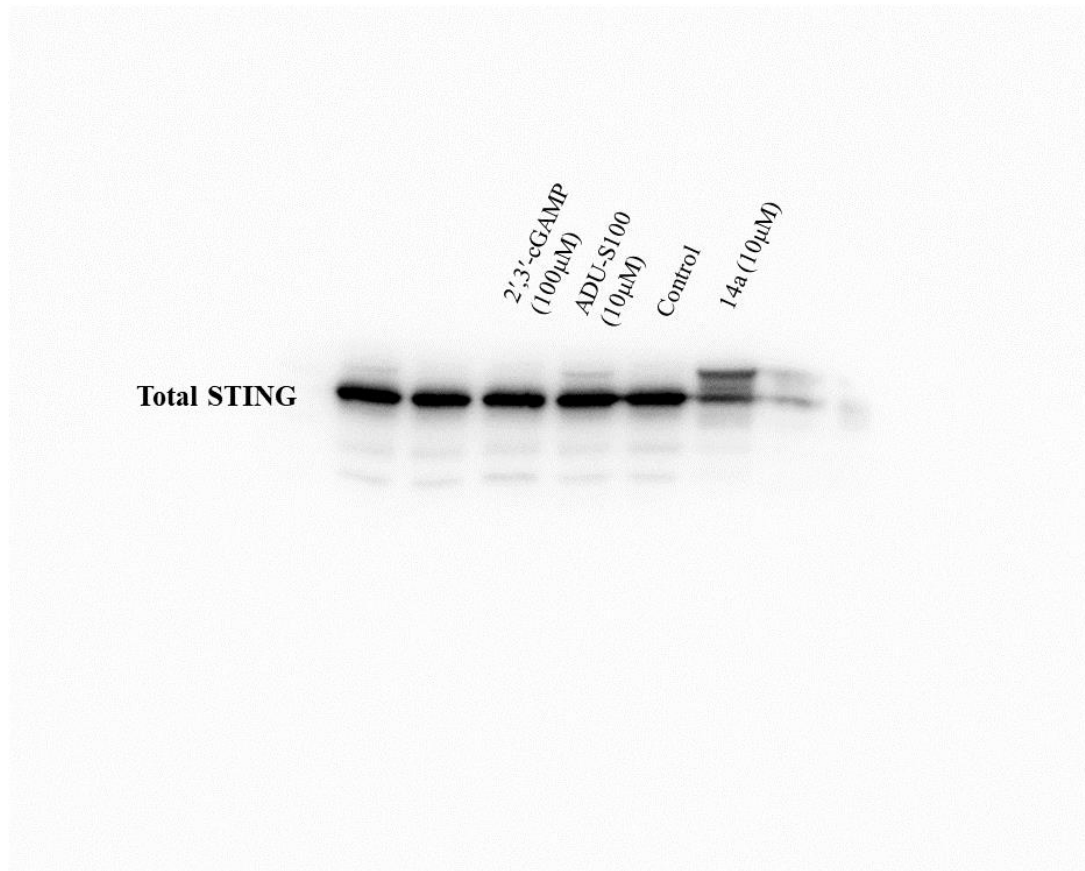

pTBK1

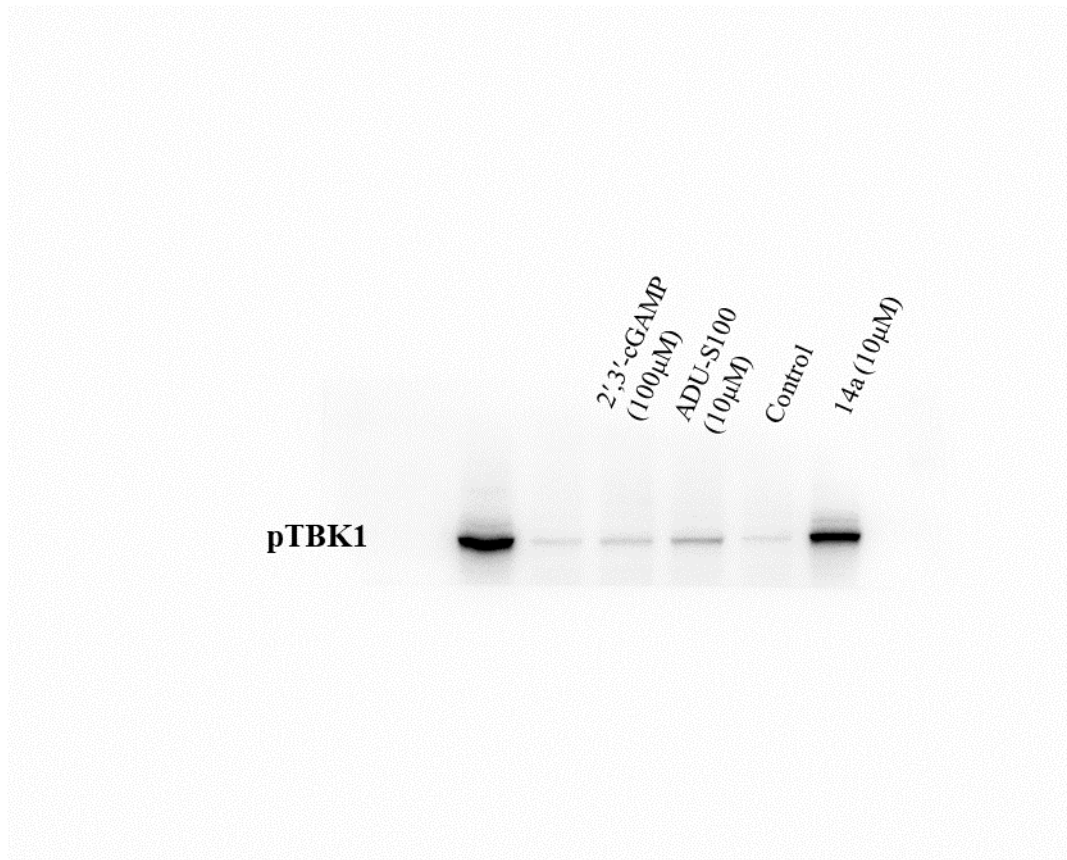



# Total TBK1

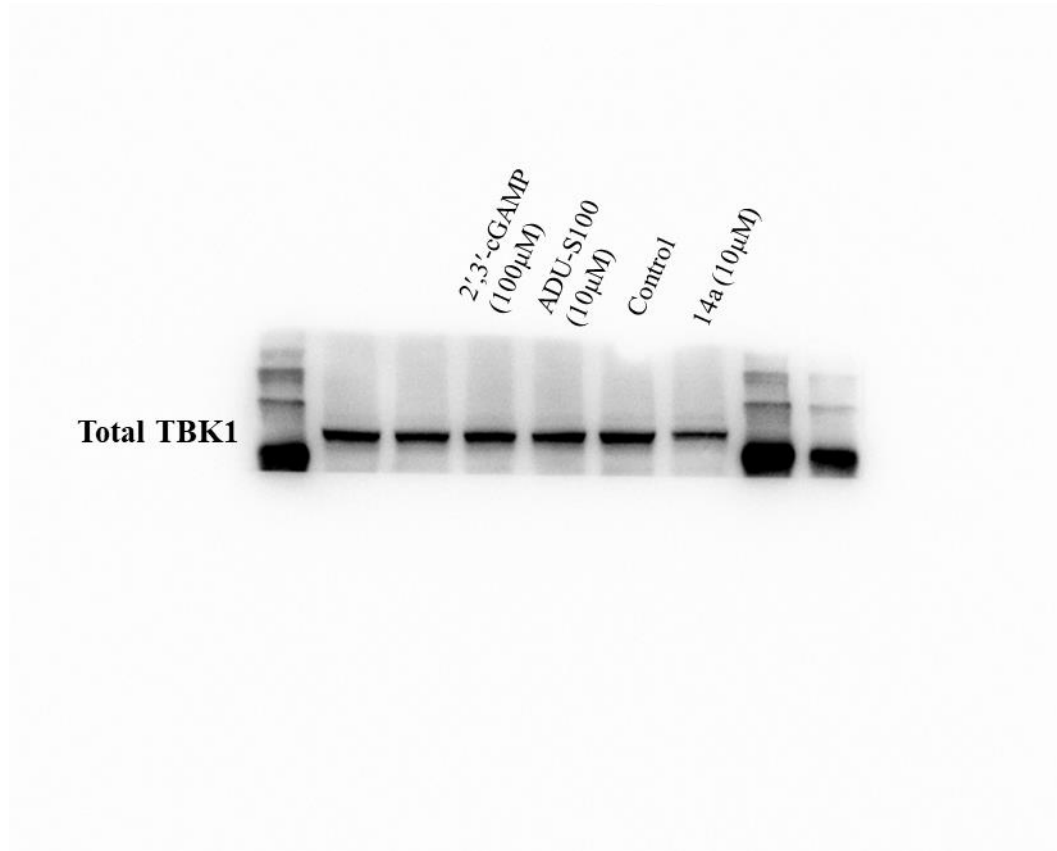

pIRF3

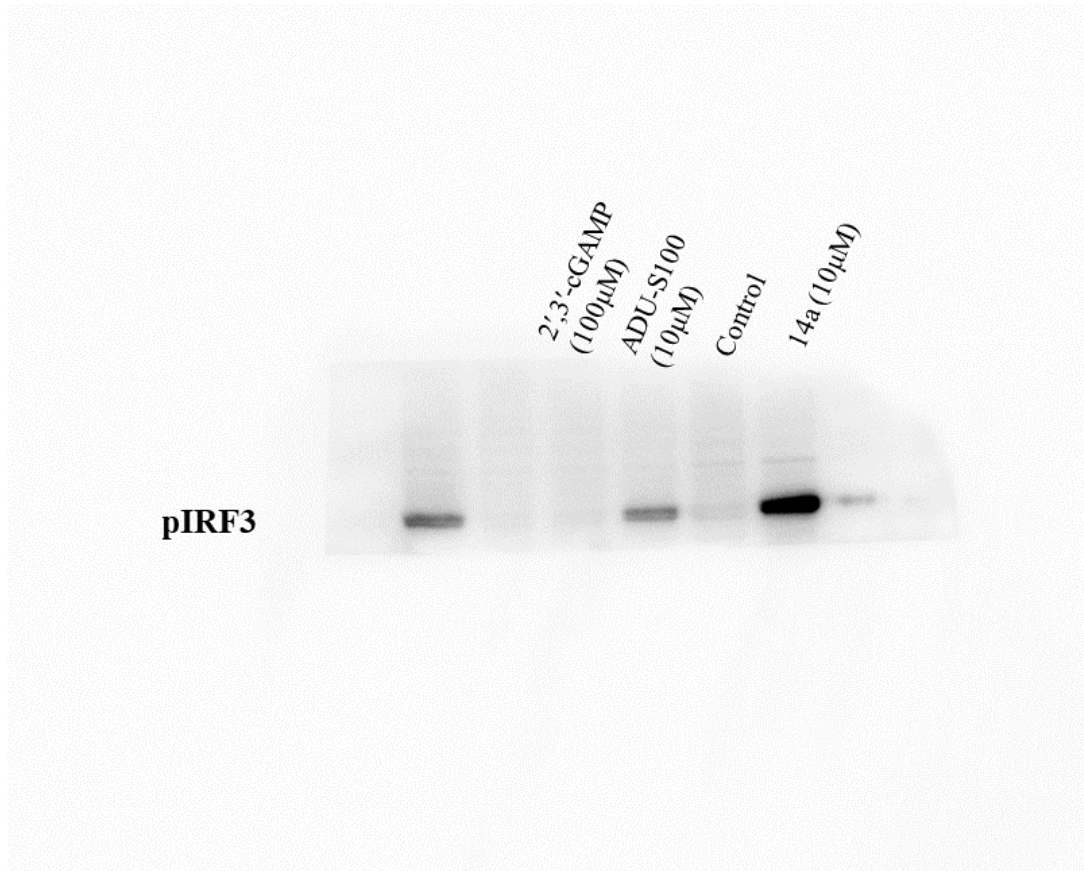

# Total IRF3

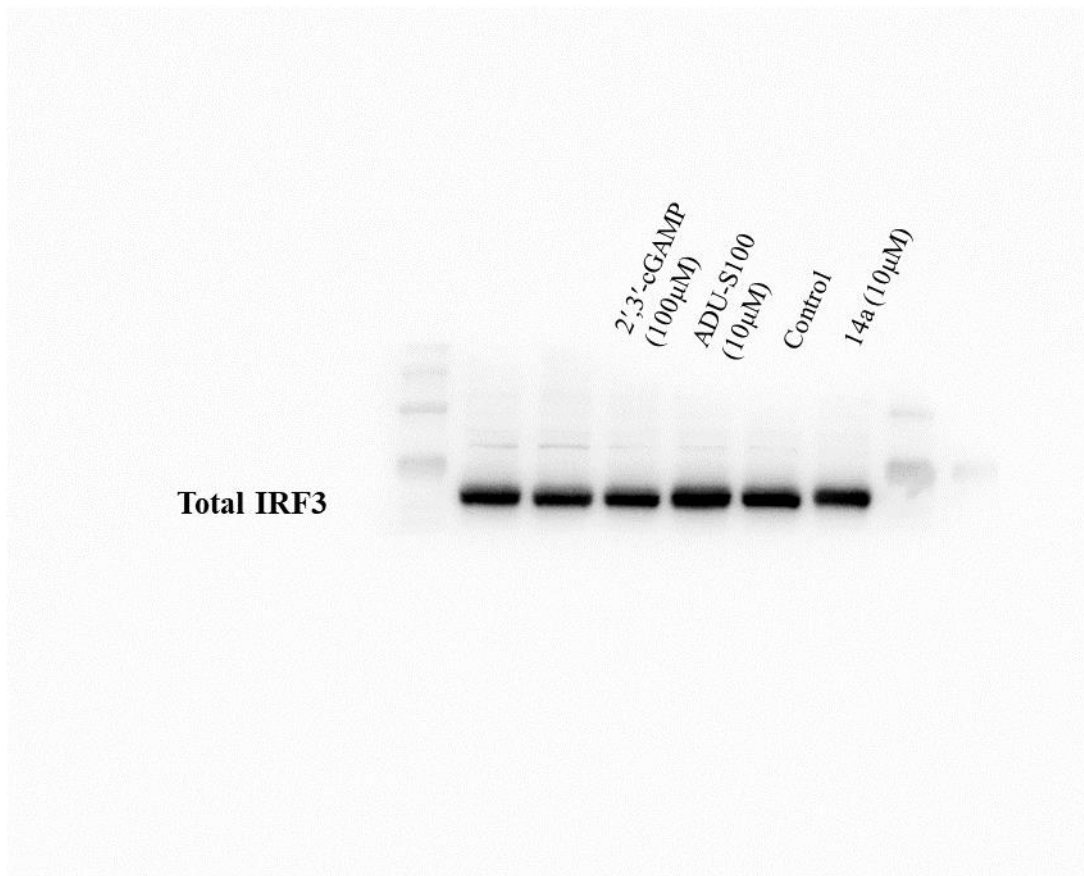

$\beta$ -actin

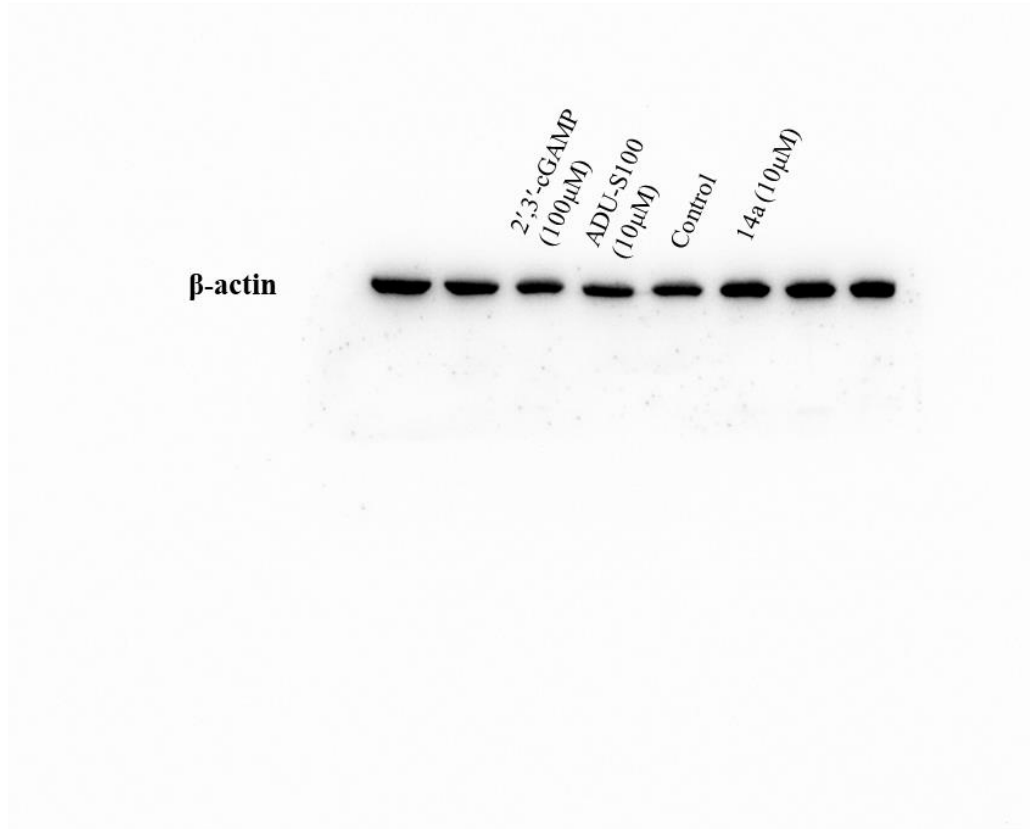

Supplement: d3ob01838e2.pdf [file d3ob01838e2.pdf]
