# Supplementary figures and images for: Design, synthesis, and cell-based in vitro assay of deoxyinosine-mixed SATE-dCDN prodrugs that activate all common STING variants
Source: Royal Society of Chemistry journal article supplement (doi:10.1039/d3ob01838e), 2023-12-16

**Raw Images of western blots:**

pSTING

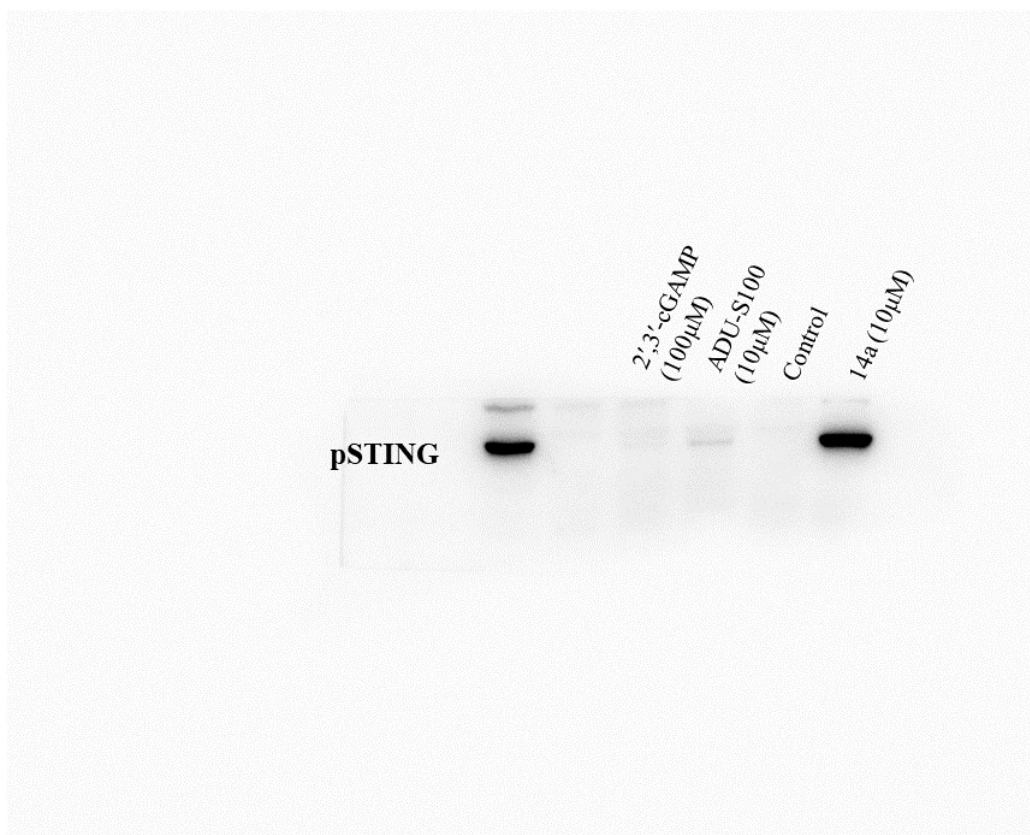

# Total STING

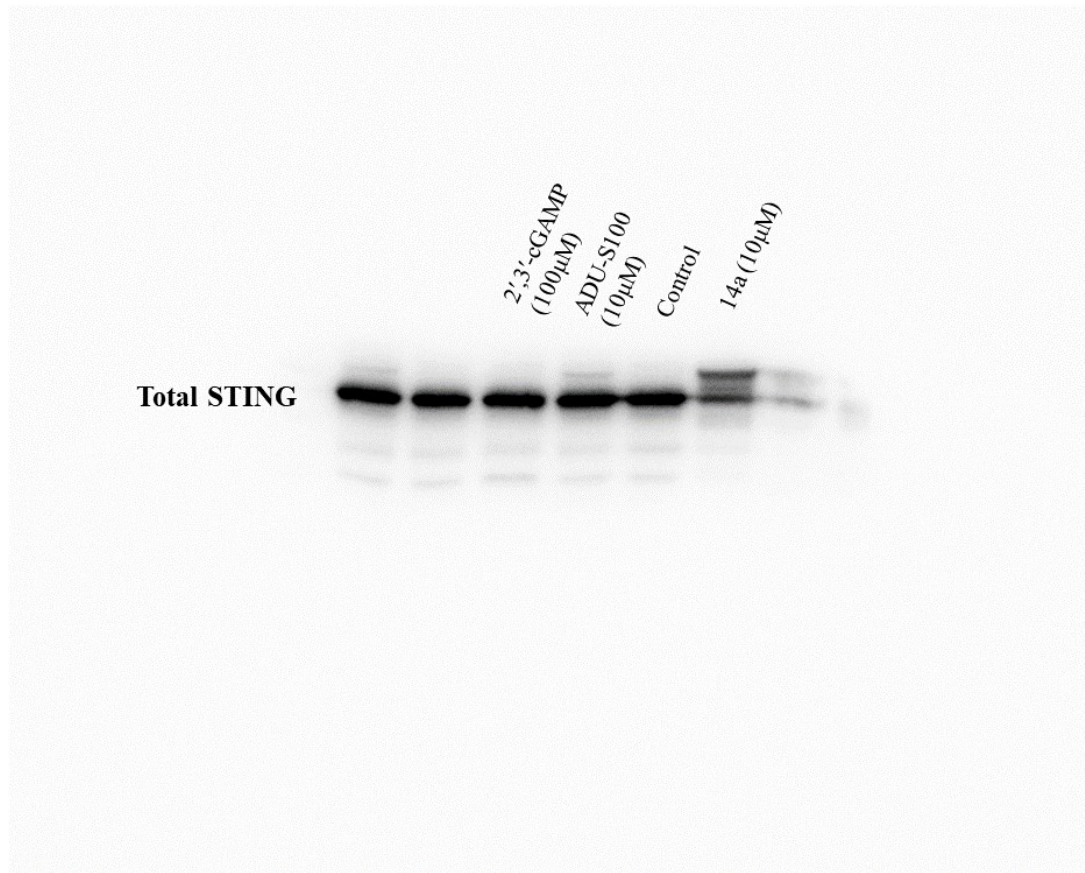

pTBK1

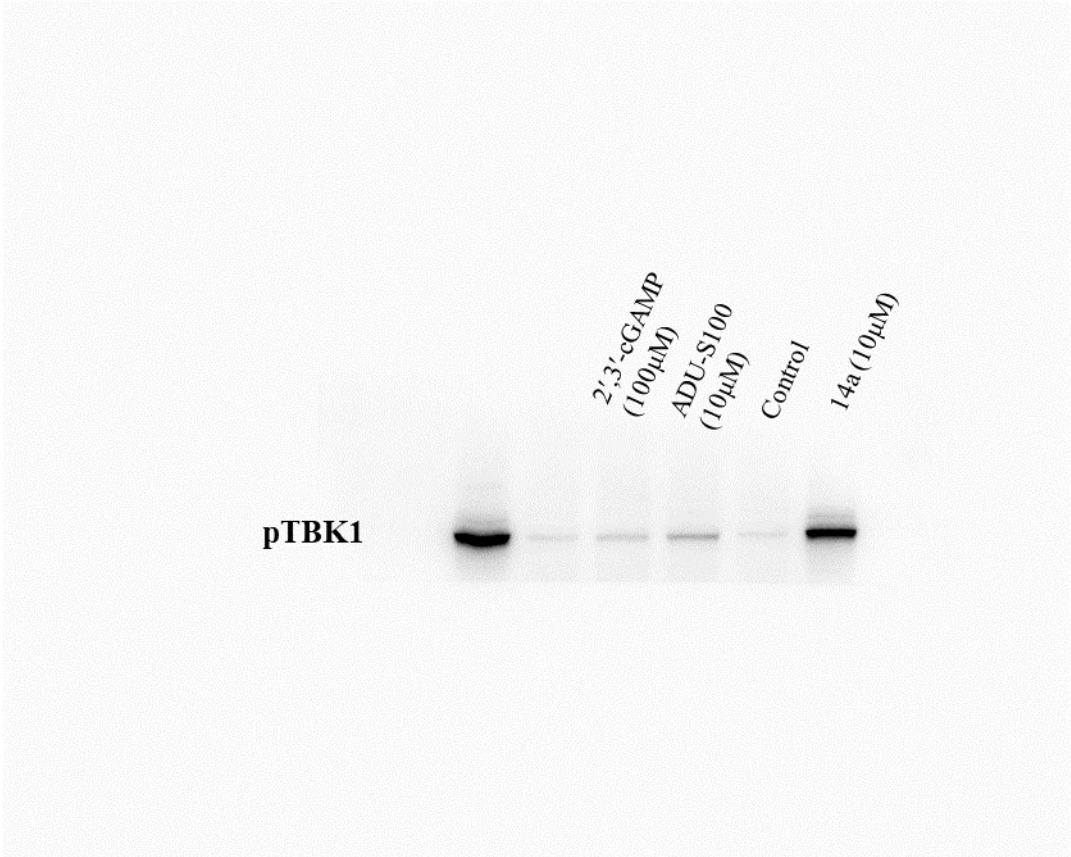

Total TBK1

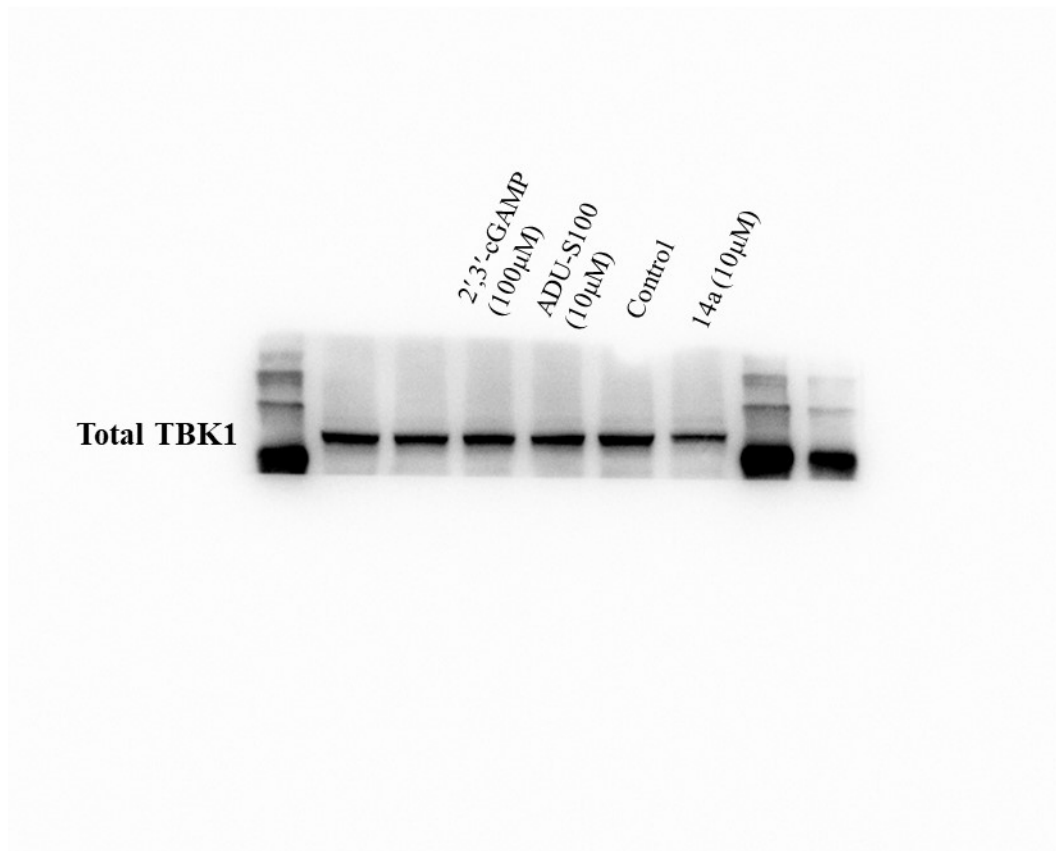

pIRF3

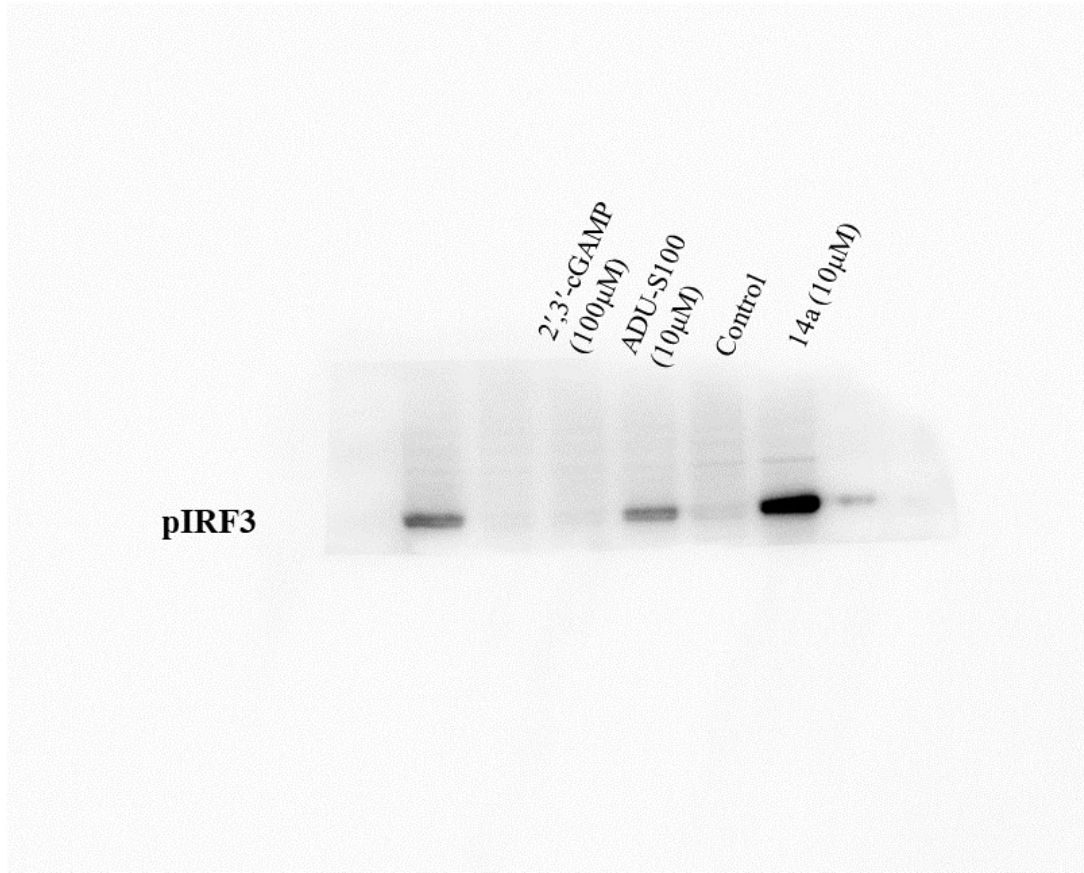

Total IRF3

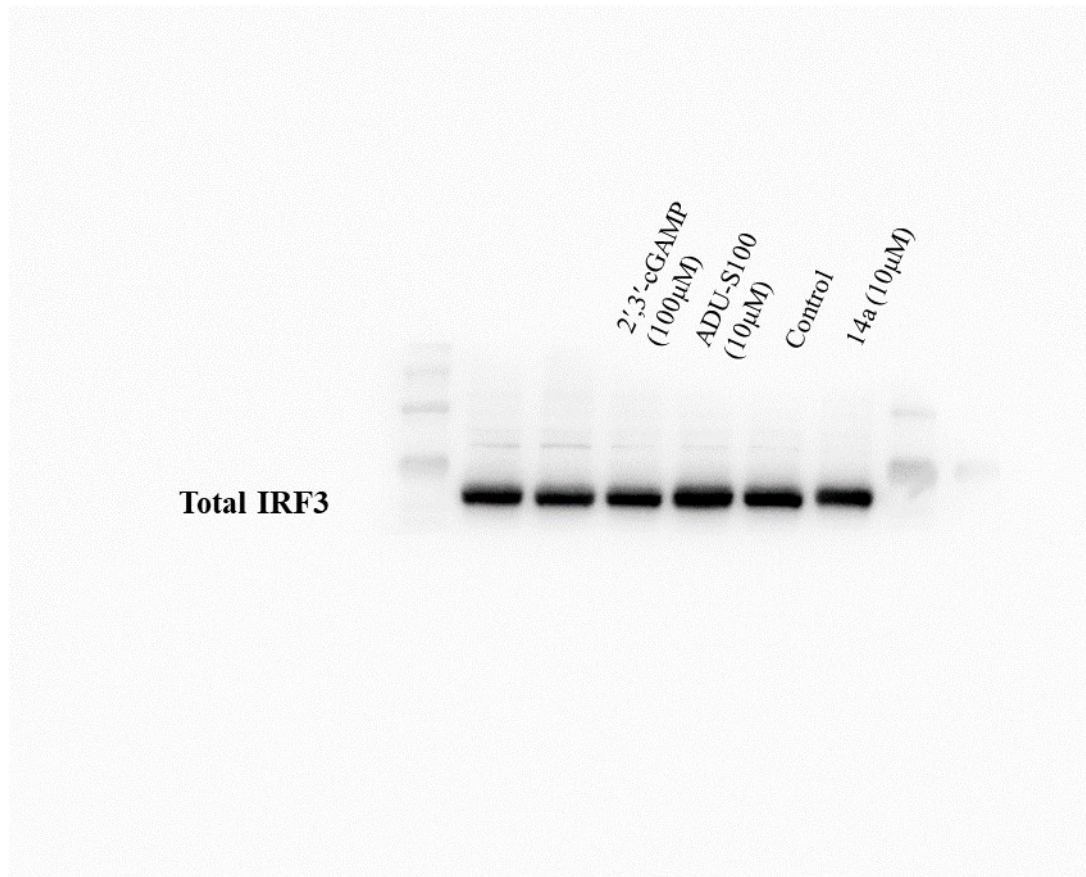

$\beta$ -actin

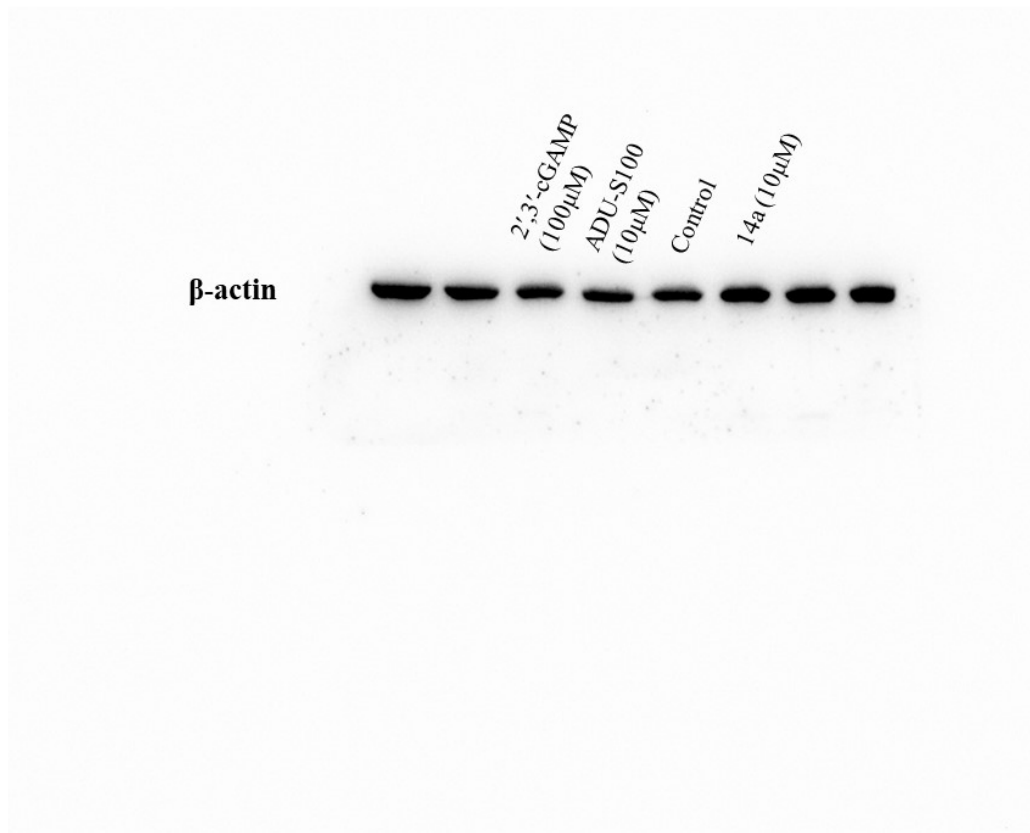

Supplement: d3ob01838e1.pdf [file d3ob01838e1.pdf]
